# Supplementary material for: Synthesis of functionalized 2-aryl-4-(indol-3-yl)-4H-chromenes via iodine-catalyzed domino Michael addition–intramolecular cyclization reaction
Source: Royal Society of Chemistry journal article supplement (doi:10.1039/c2ob26642c), 2012-01-01

## *Supplementary Information*

### **Synthesis of functionalized 2-aryl-4-(indol-3-yl)-4*H*-chromenes via iodine-catalyzed domino Michael addition-intramolecular cyclization reaction**

Guodong Yin,<sup>\*,a</sup> Ling Fan,<sup>a</sup> Tianbing Ren,<sup>a</sup> Chunyang Zheng,<sup>a</sup> Qing Tao,<sup>a</sup>  
Anxin Wu,<sup>b</sup> and Nengfang She<sup>\*,b</sup>

<sup>a</sup>Hubei Key Laboratory of Pollutant Analysis & Reuse Technology, College of Chemistry and Environmental Engineering, Hubei Normal University, Huangshi 435002, China.  
E-mail: gdyin@hbnu.edu.cn

<sup>b</sup>Key Laboratory of Pesticides and Chemical Biology of the Ministry of Education, College of Chemistry, Central China Normal University, Wuhan 430079, China.  
E-mail: nfshe@mail.ccnu.edu.cn

## Outline

|                                                                                    |         |
|------------------------------------------------------------------------------------|---------|
| ◆ Mechanism study.....                                                             | S2      |
| ◆ Spectral copies of <sup>1</sup> H NMR, <sup>13</sup> C NMR of all compounds..... | S3-S50  |
| ◆ HRMS for compounds <b>5</b> , <b>7-9</b> .....                                   | S51-S66 |
| ◆ HSQC Spectrum of compound <b>7</b> .....                                         | S67     |

### ◆ Mechanism study

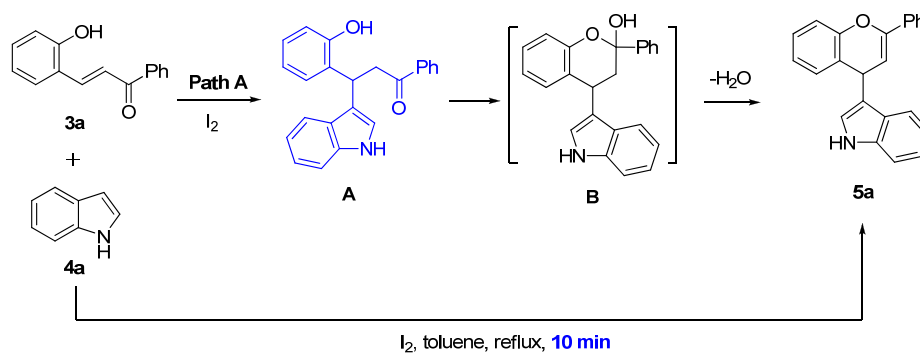

ESI-MS of the reaction mixture after 10min, and intermediate **A** was observed.

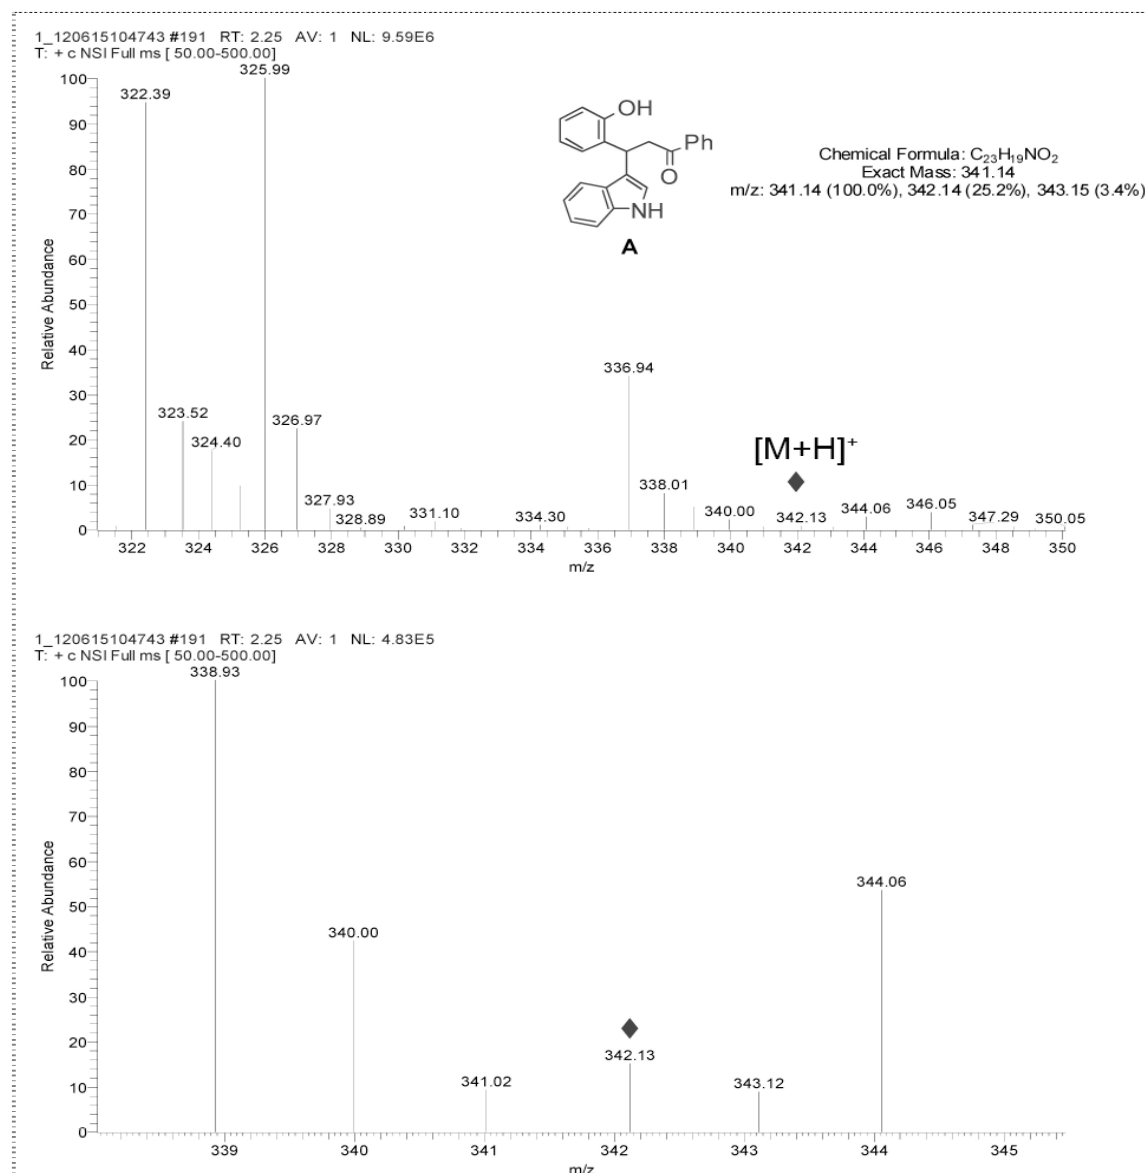

$^1\text{H}$  NMR (300MHz,  $\text{CDCl}_3$ )

8.1882  
8.1352  
8.0538  
8.0508  
8.0271  
8.0218  
7.7341  
7.6813  
7.6154  
7.6108  
7.6001  
7.5911  
7.5845  
7.5717  
7.5671  
7.5631  
7.5320  
7.5104  
7.5057  
7.4875  
7.4822  
7.4775  
7.3079  
7.3027  
7.2809  
7.2781  
7.2609  
7.2598  
7.2513  
6.9895  
6.9652  
6.9395  
6.9124  
6.5206  
6.5111

—1.6307

—-0.0001

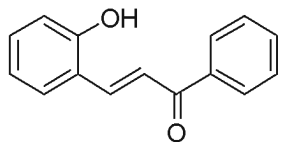

(3a)

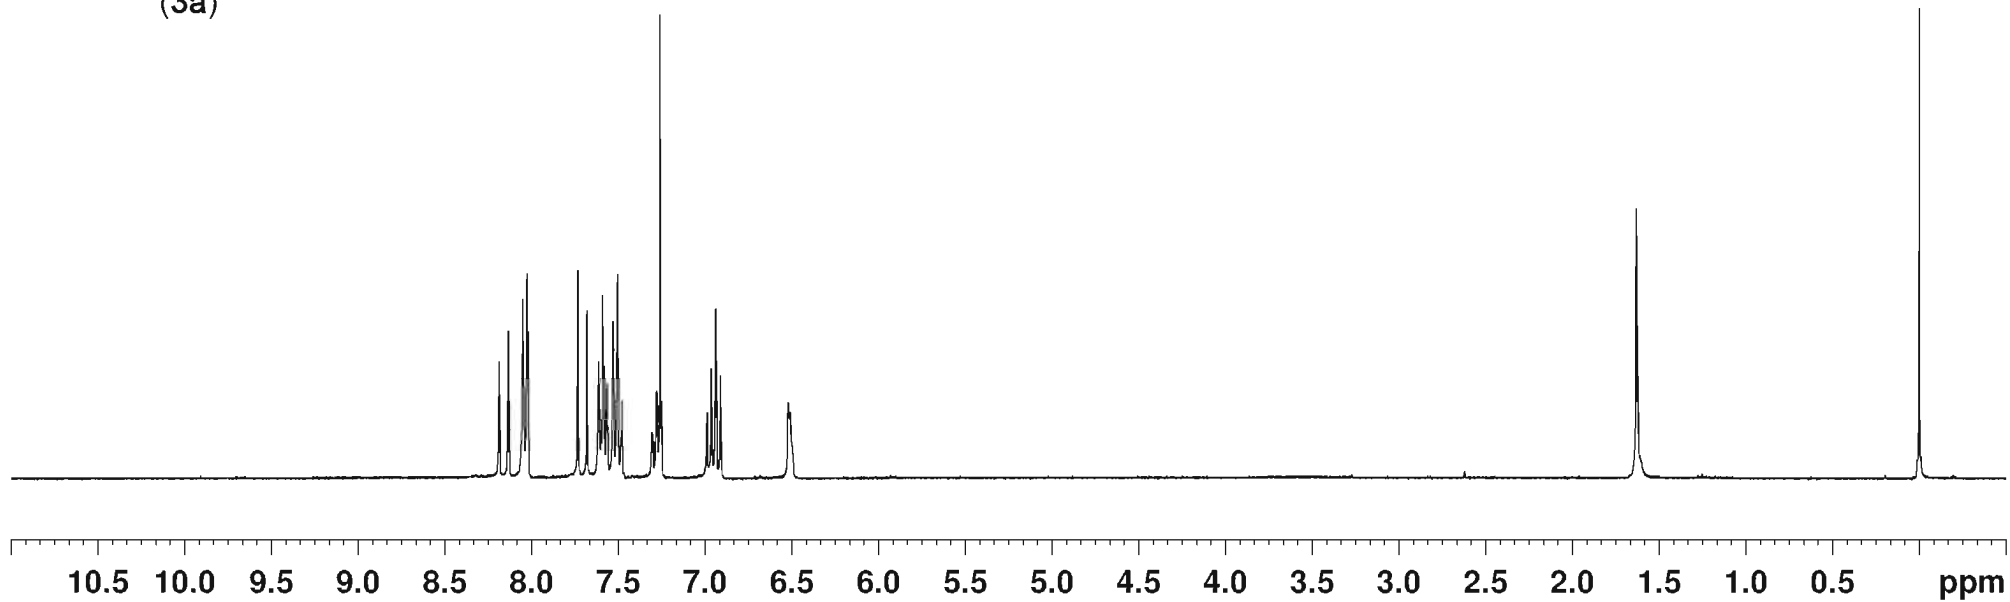

1.31  
2.31  
1.31  
2.37  
2.28  
0.96  
2.37  
1.00

$^1\text{H}$  NMR (300MHz,  $\text{CDCl}_3$ )

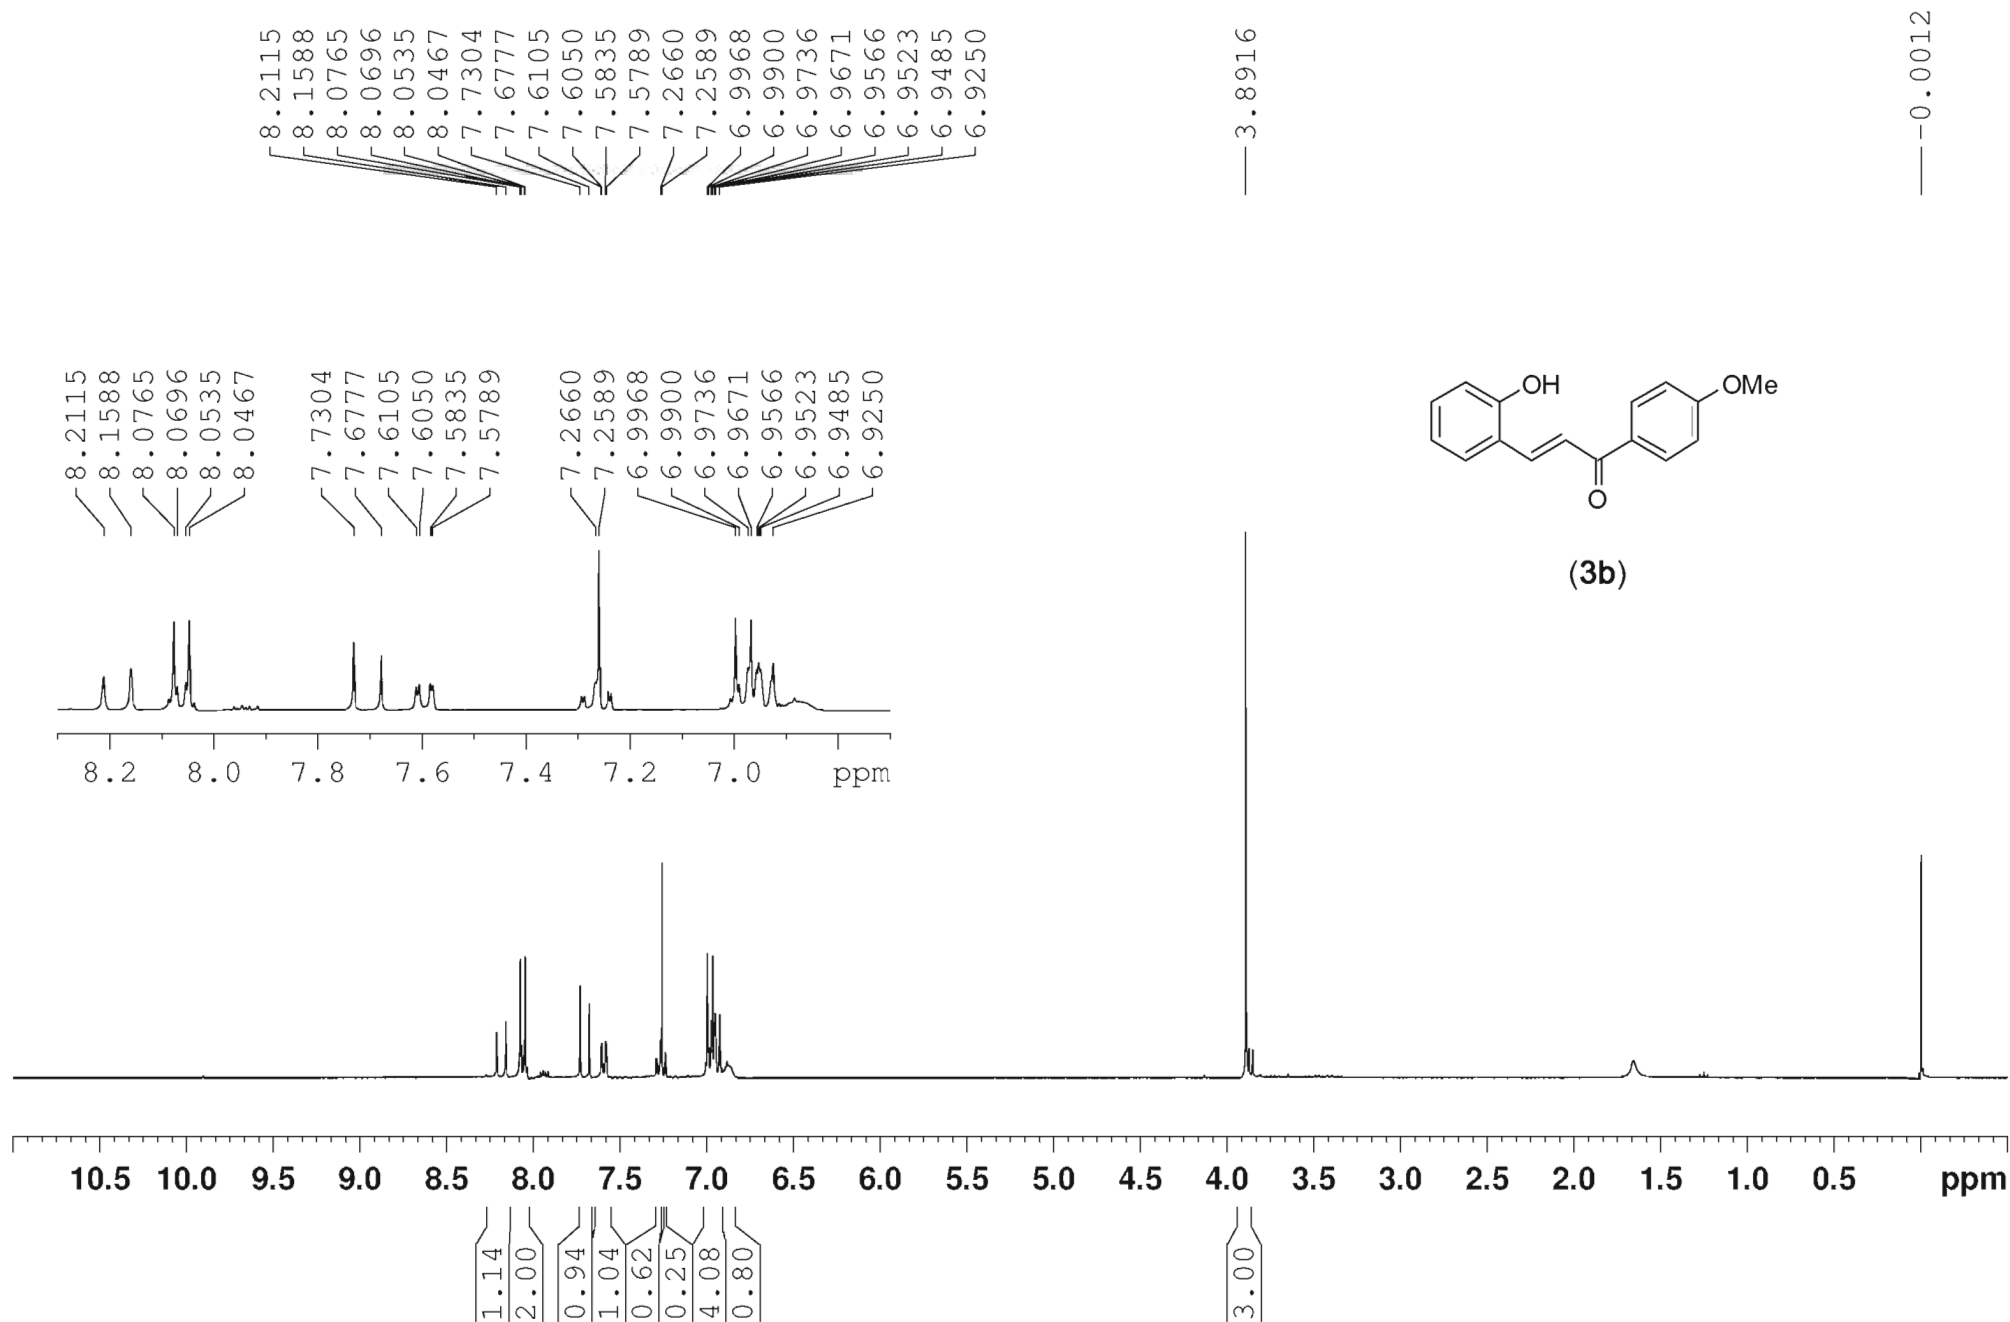

$^1\text{H}$  NMR (300MHz,  $\text{CDCl}_3$ )

8.1818  
8.1291  
7.9940  
7.9873  
7.9716  
7.9649  
7.9571  
7.6868  
7.6340  
7.6062  
7.6008  
7.5803  
7.5750  
7.4969  
7.4890  
7.4823  
7.4666  
7.4599  
7.4521  
7.3140  
7.3085  
7.2870  
7.2840  
7.2820  
7.2618  
7.2573  
6.9921  
6.9896  
6.9641  
6.9419  
6.9392  
6.9220  
6.9196  
6.8950  
6.8924

0.0000

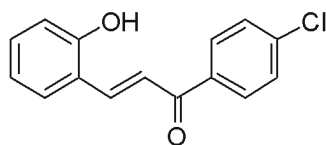

(3c)

8.1818  
8.1291  
7.9940  
7.9873  
7.9716  
7.9649  
7.9571  
7.6868  
7.6340  
7.6062  
7.6008  
7.5803  
7.5750  
7.4890  
7.4823  
7.4666  
7.4599  
7.4521  
7.3140  
7.3085  
7.2870  
7.2840  
7.2820  
7.2618  
7.2573  
6.9921  
6.9896  
6.9641  
6.9419  
6.9392  
6.9220  
6.9196  
6.8950  
6.8924

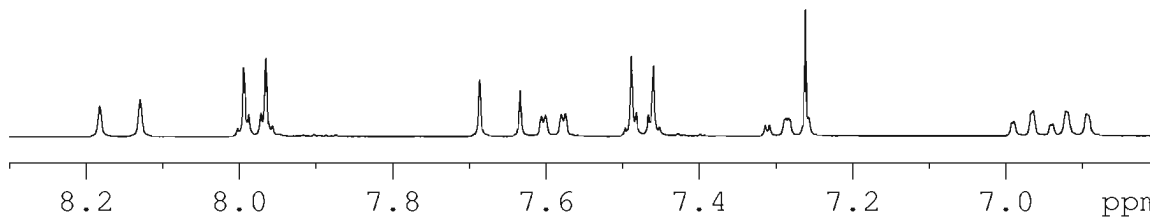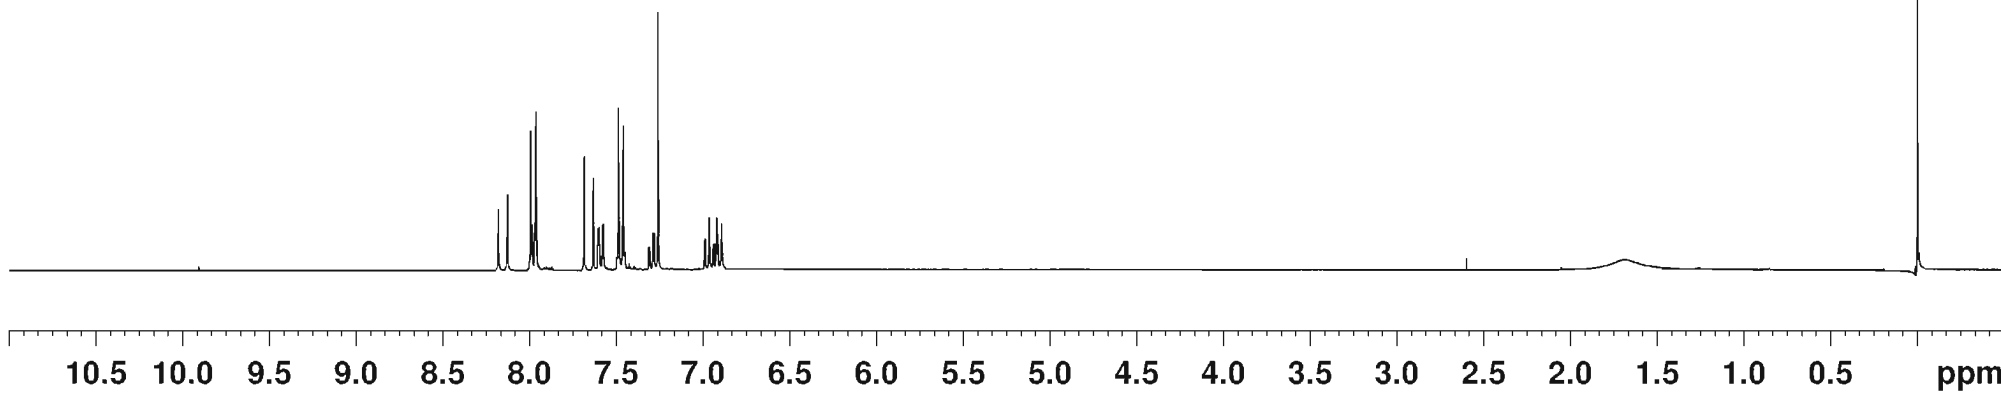

1.00  
2.01  
1.02  
0.47  
0.55  
1.97  
0.72  
2.21

$^{13}\text{C}$  NMR (75MHz,  $\text{CDCl}_3$ )

— 190.4862

— 155.7926

141.3824

139.1137

136.5596

131.9218

129.9859

129.5900

128.8422

122.1885

121.9936

120.8958

116.5484

77.3680

76.9447

76.5213

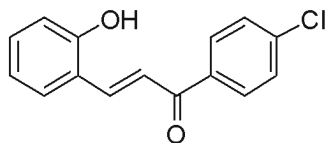

(3c)

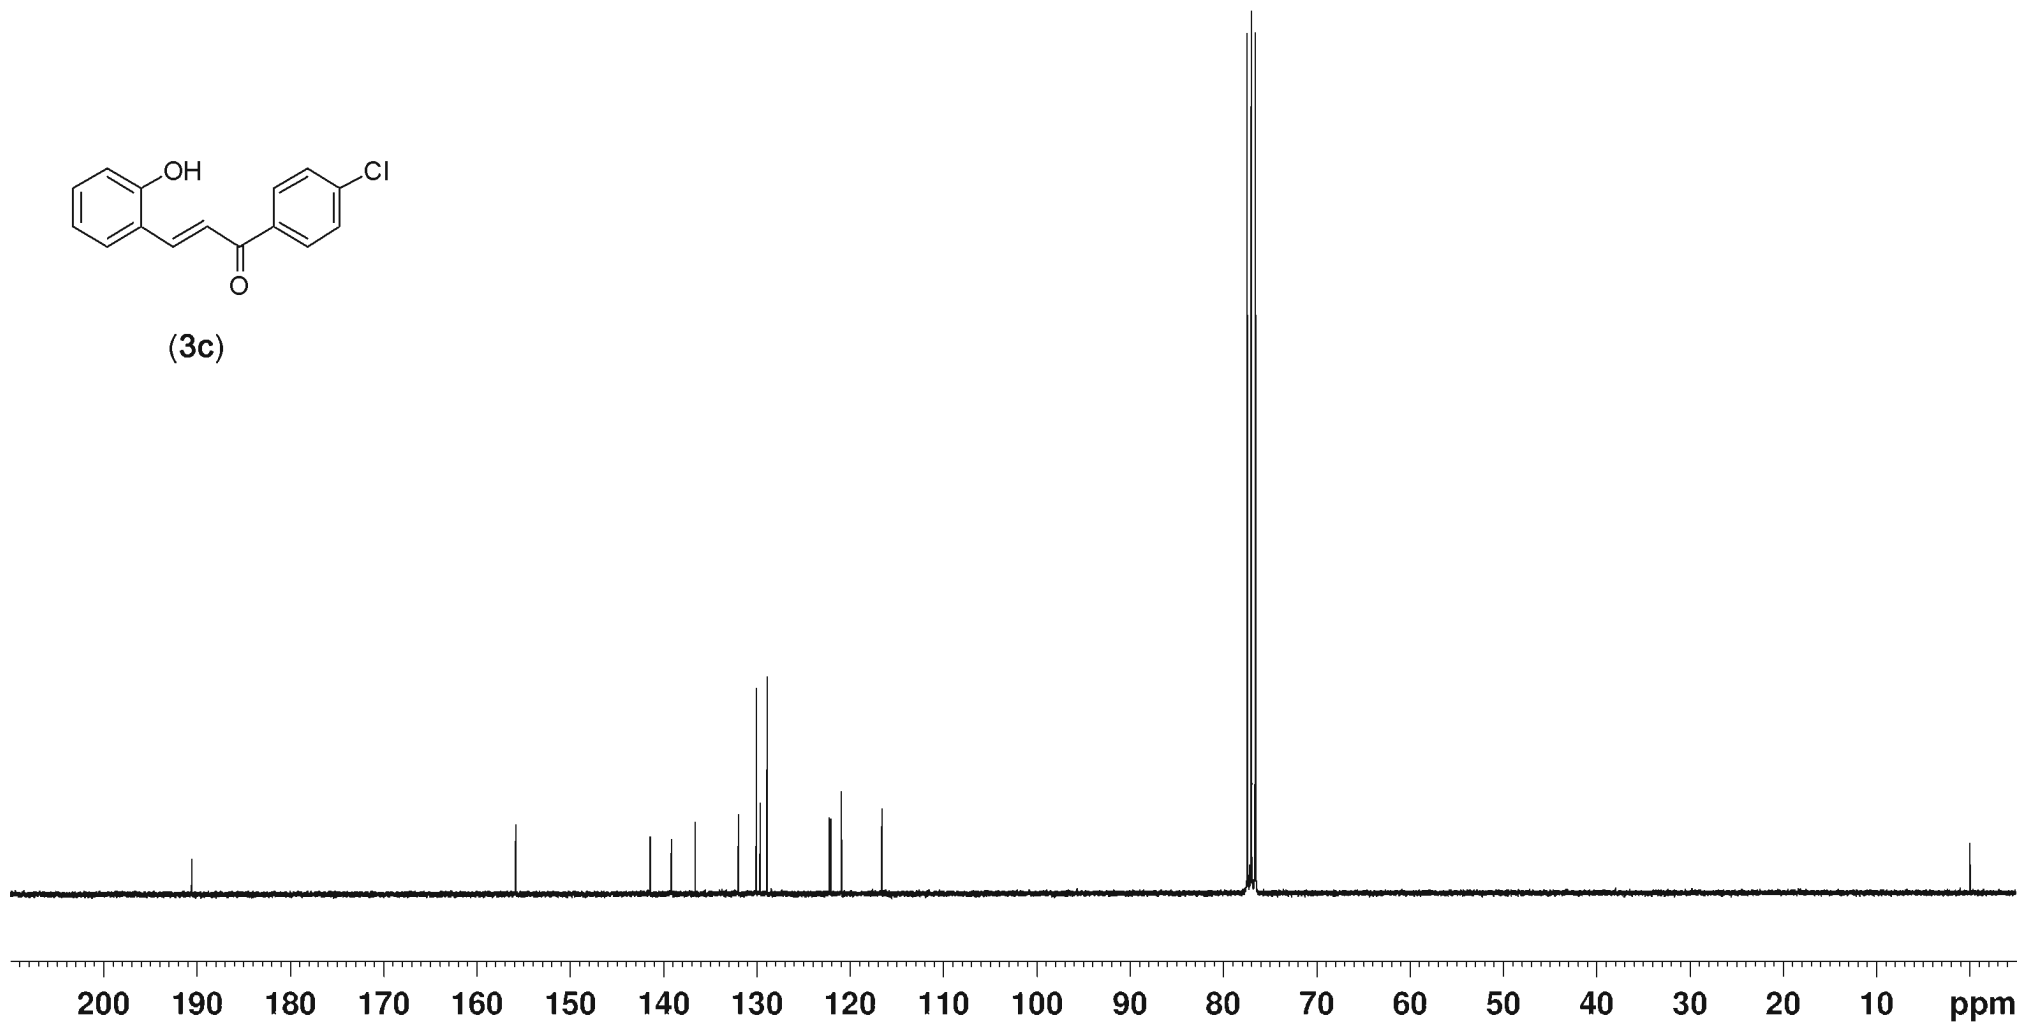

$^1\text{H}$  NMR (300MHz,  $\text{DMSO-d}_6$ )

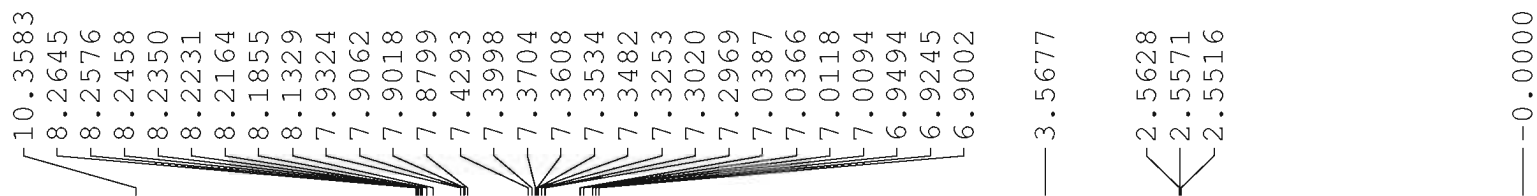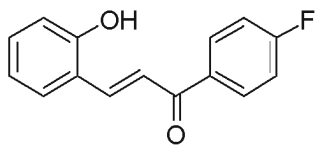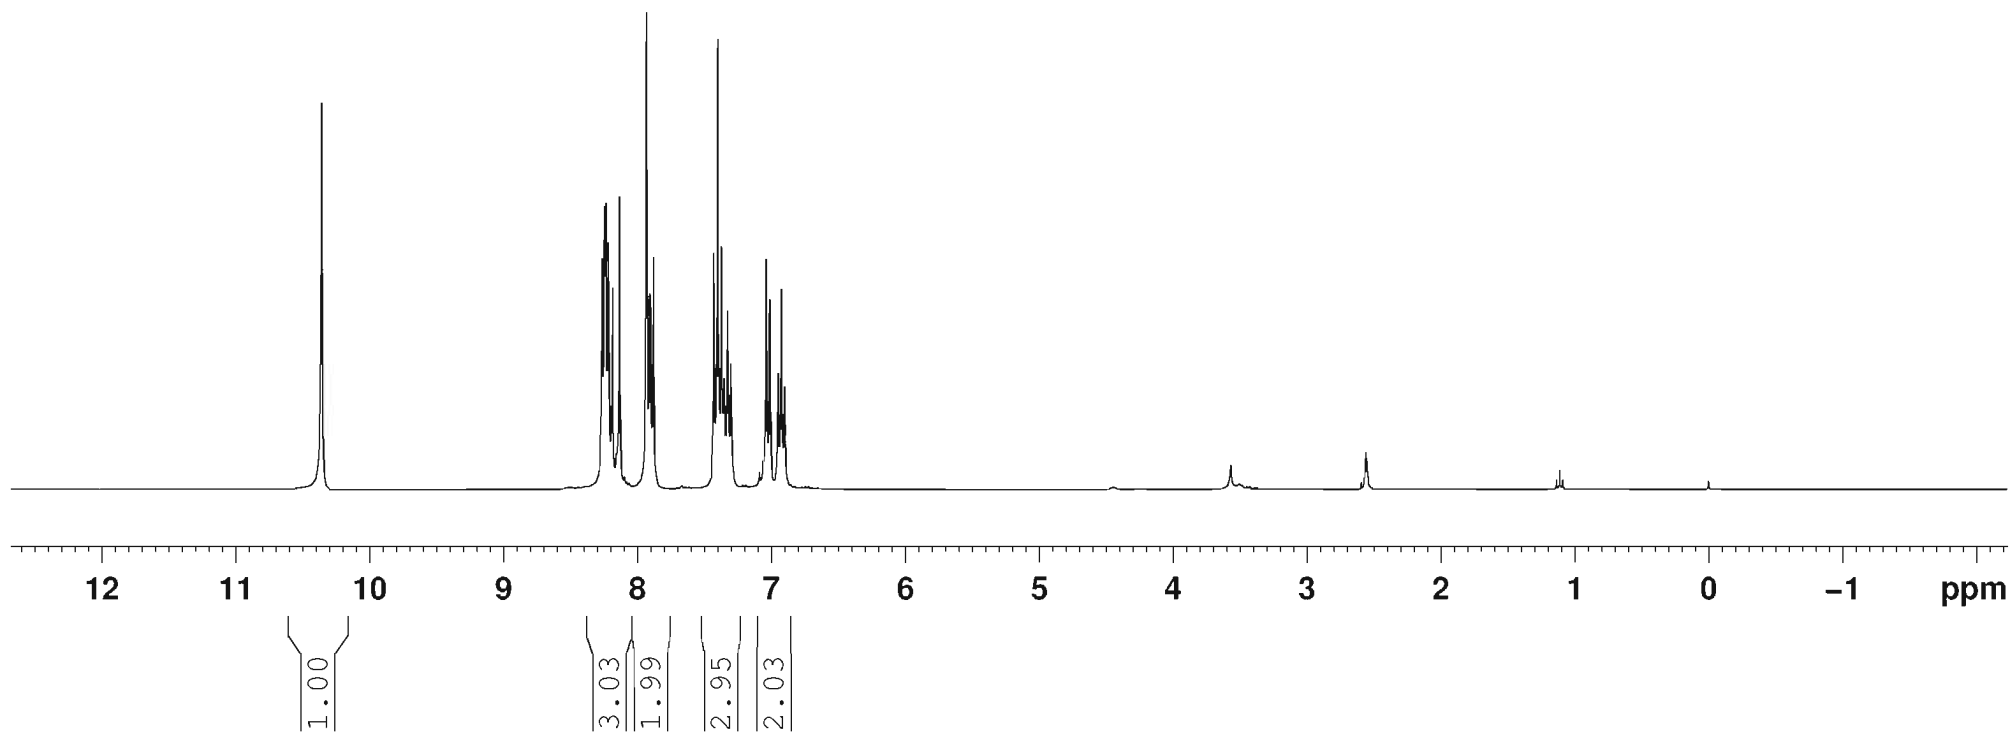

$^{13}\text{C}$  NMR (75MHz, DMSO- $\text{d}_6$ )

— 187.9875

— 166.5949

— 163.2572

— 157.3503

139.7294

134.6125

134.5758

132.1020

131.3458

131.2220

128.7022

121.4069

120.6197

119.4148

116.2936

115.8599

115.5717

40.3269

40.0562

39.7774

39.5006

39.2211

38.9481

38.6636

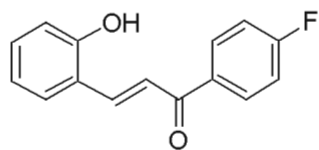

(3d)

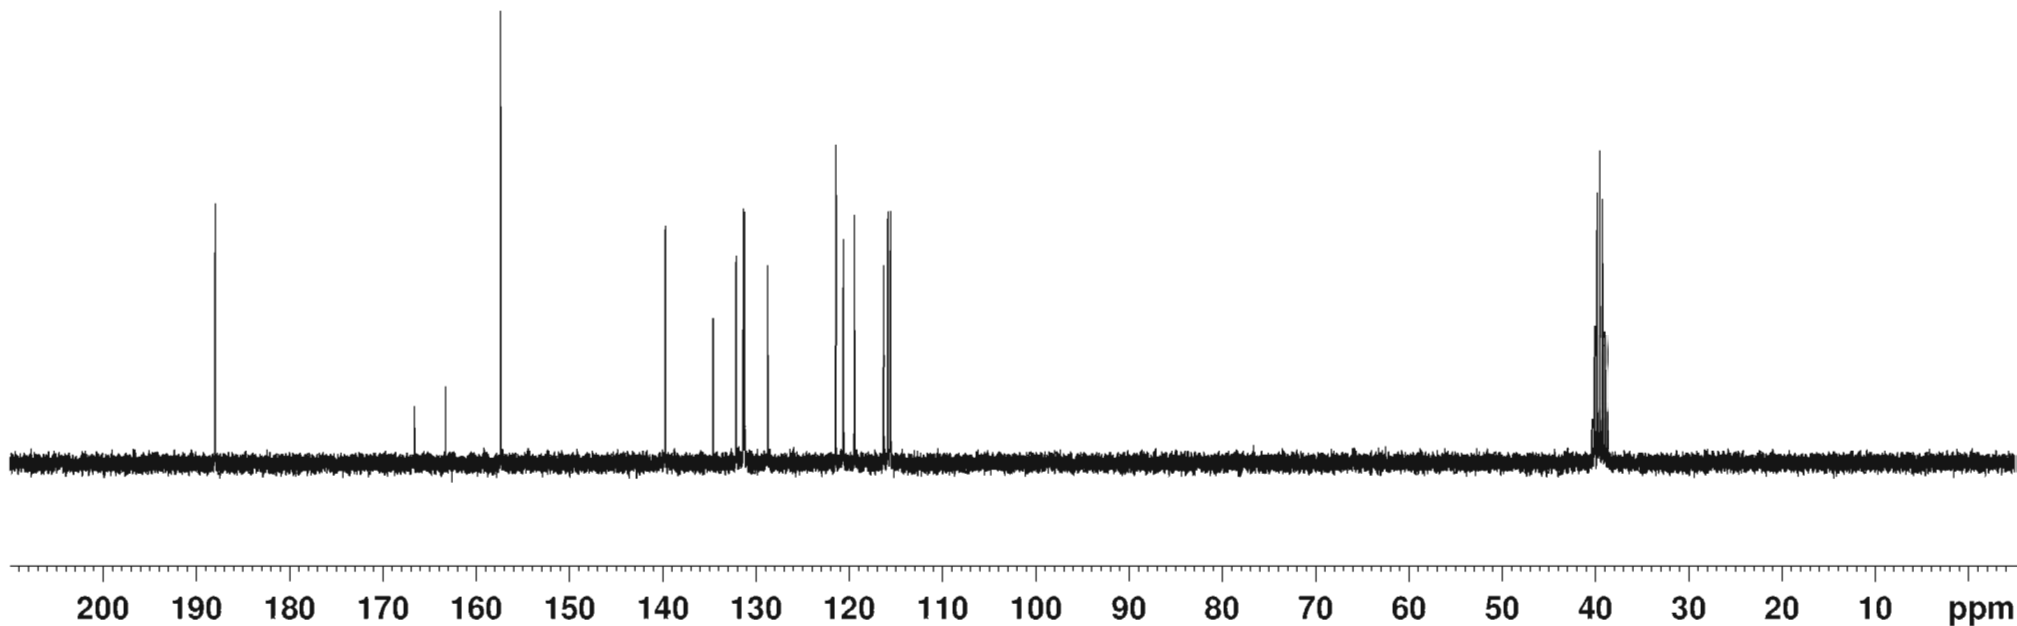



$^1\text{H}$  NMR (300MHz,  $\text{CDCl}_3$ )

8.2266  
7.6642  
7.6619  
7.6586  
7.6563  
7.6285  
7.6236  
7.6052  
7.5978  
7.5523  
7.3547  
7.3525  
7.3428  
7.3406  
7.3035  
7.2980  
7.2766  
7.2729  
7.2614  
7.2520  
7.2465  
6.9822  
6.9567  
6.9404  
6.9136  
6.6046  
6.5989  
6.5927  
6.5870  
6.4996

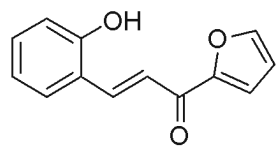

(3e)

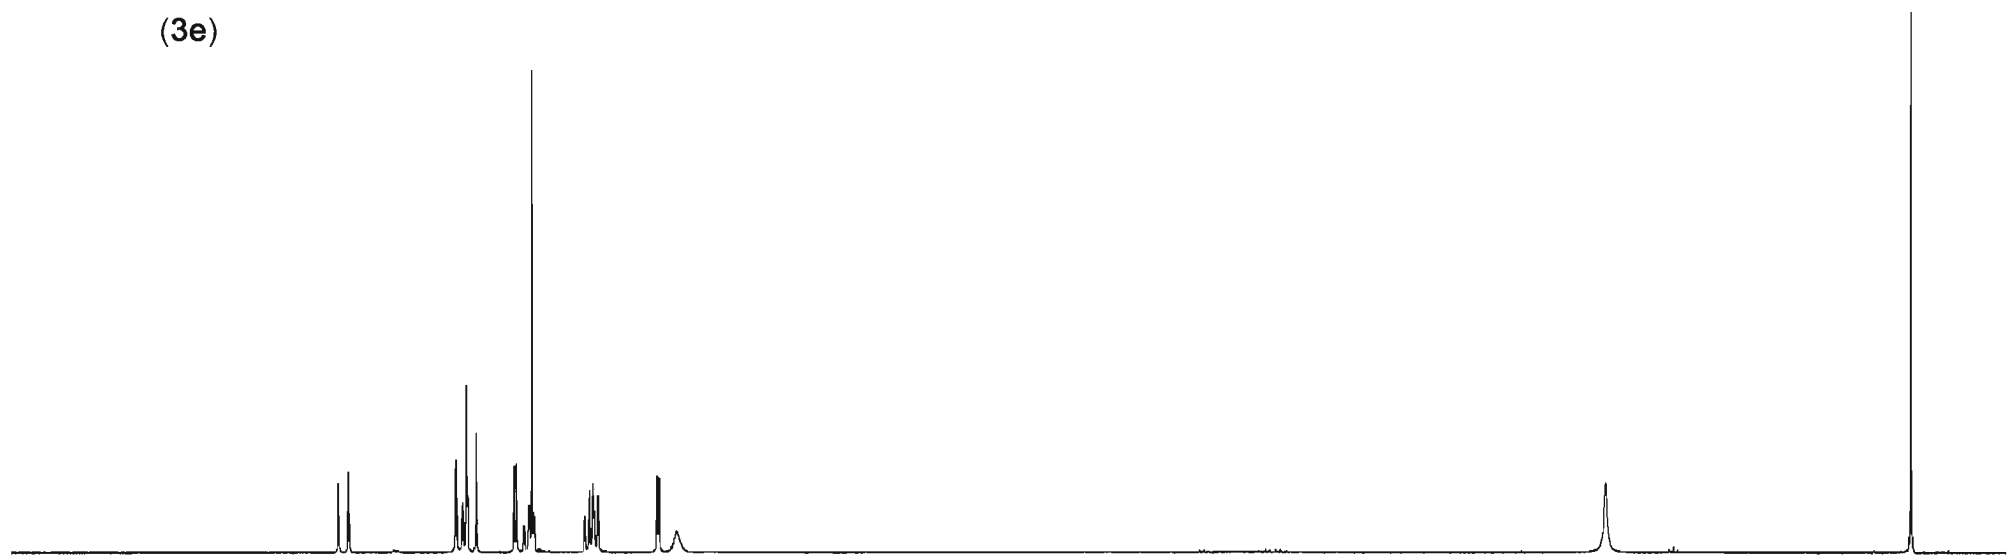

— 1.6079

0.0109  
0.0001  
-0.0110

9.5 9.0 8.5 8.0 7.5 7.0 6.5 6.0 5.5 5.0 4.5 4.0 3.5 3.0 2.5 2.0 1.5 1.0 0.5 ppm

1.00  
2.92  
0.88  
2.20  
1.98  
0.84  
0.69

$^{13}\text{C}$  NMR (75MHz,  $\text{CDCl}_3$ )

— 178.9468

— 155.9351

— 153.7813

— 146.6317

— 139.8820

— 131.8957

— 129.3214

— 122.0378

— 121.6033

— 120.8269

— 117.7722

— 116.6730

— 112.5199

— 77.4265

— 77.0034

— 76.5798

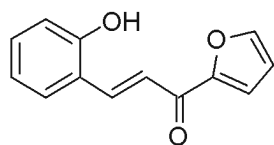

(3e)

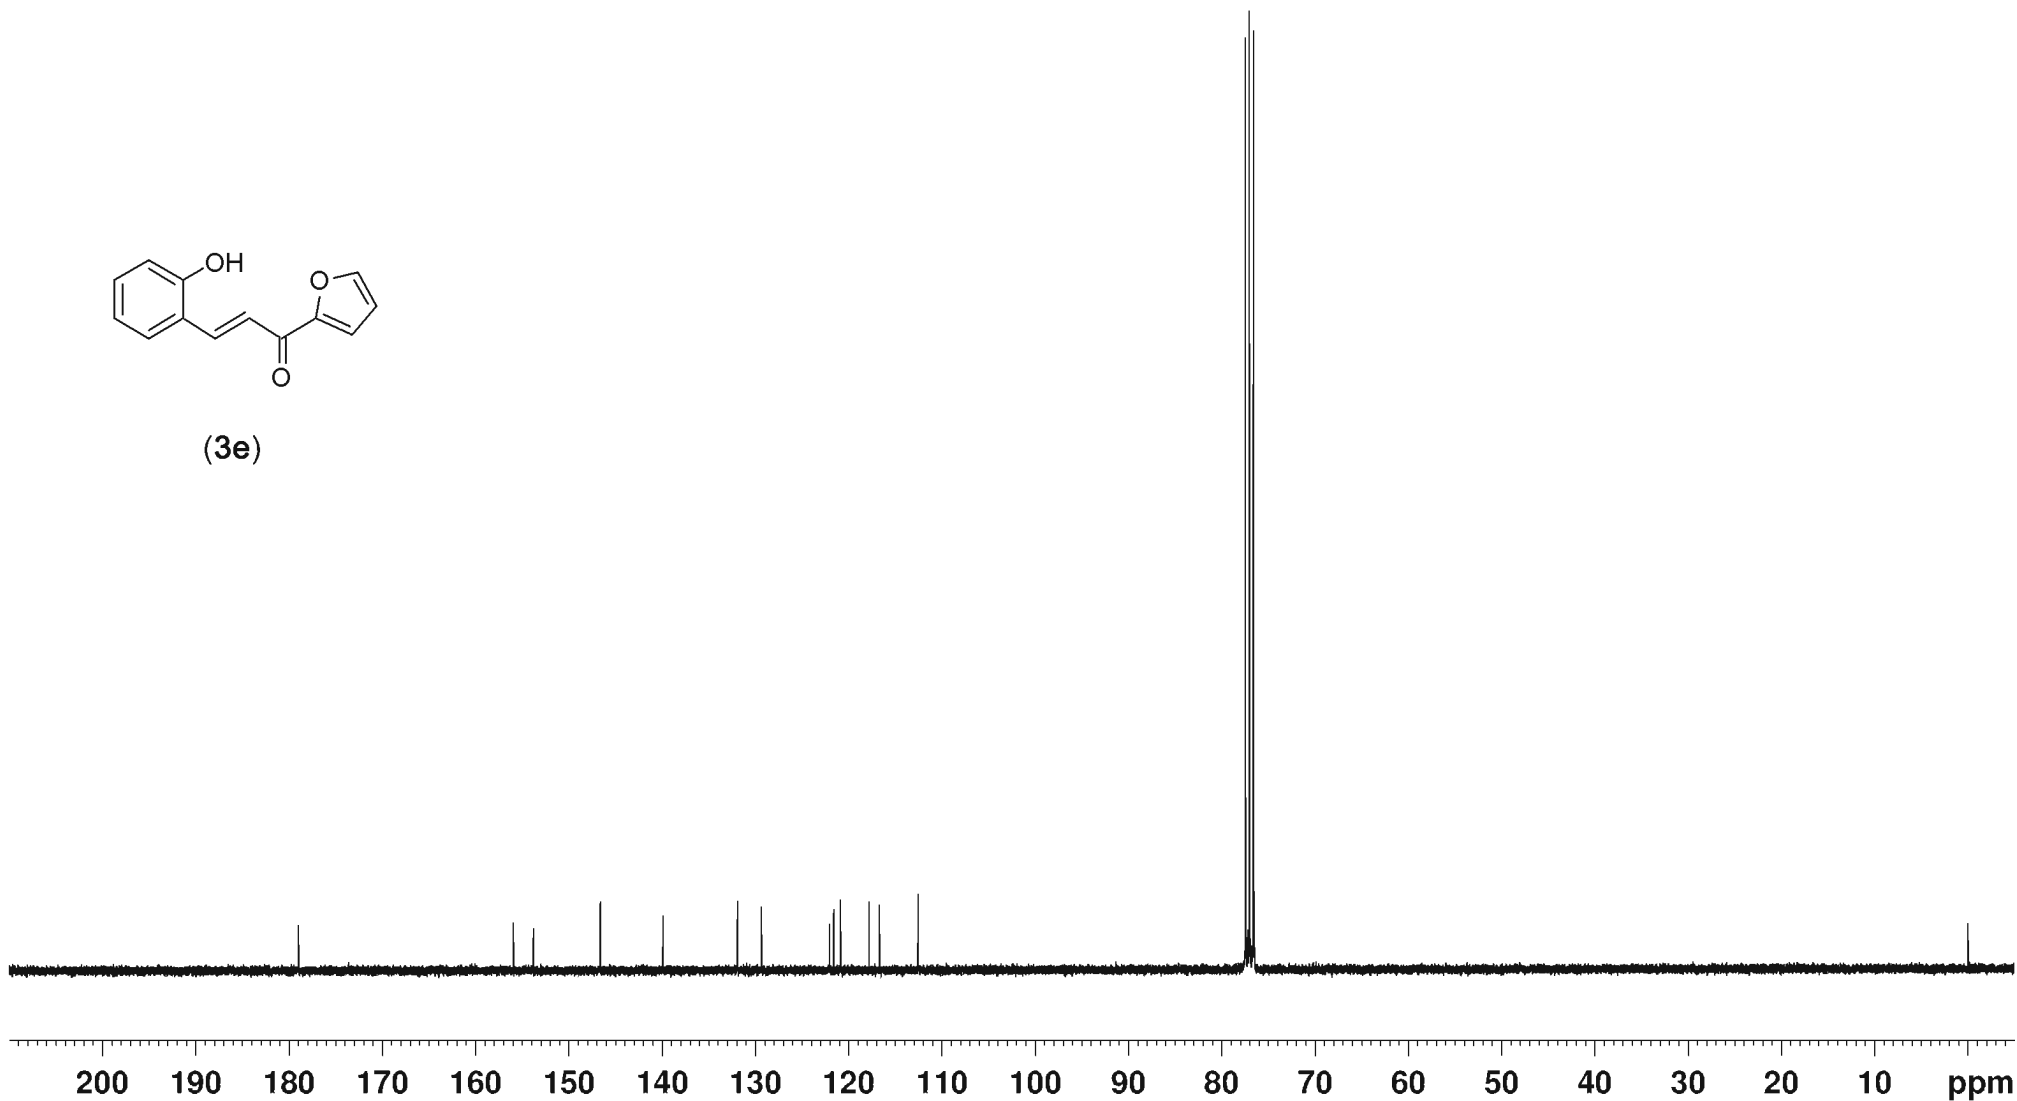

<sup>1</sup>H NMR (300MHz, DMSO-d<sub>6</sub>)

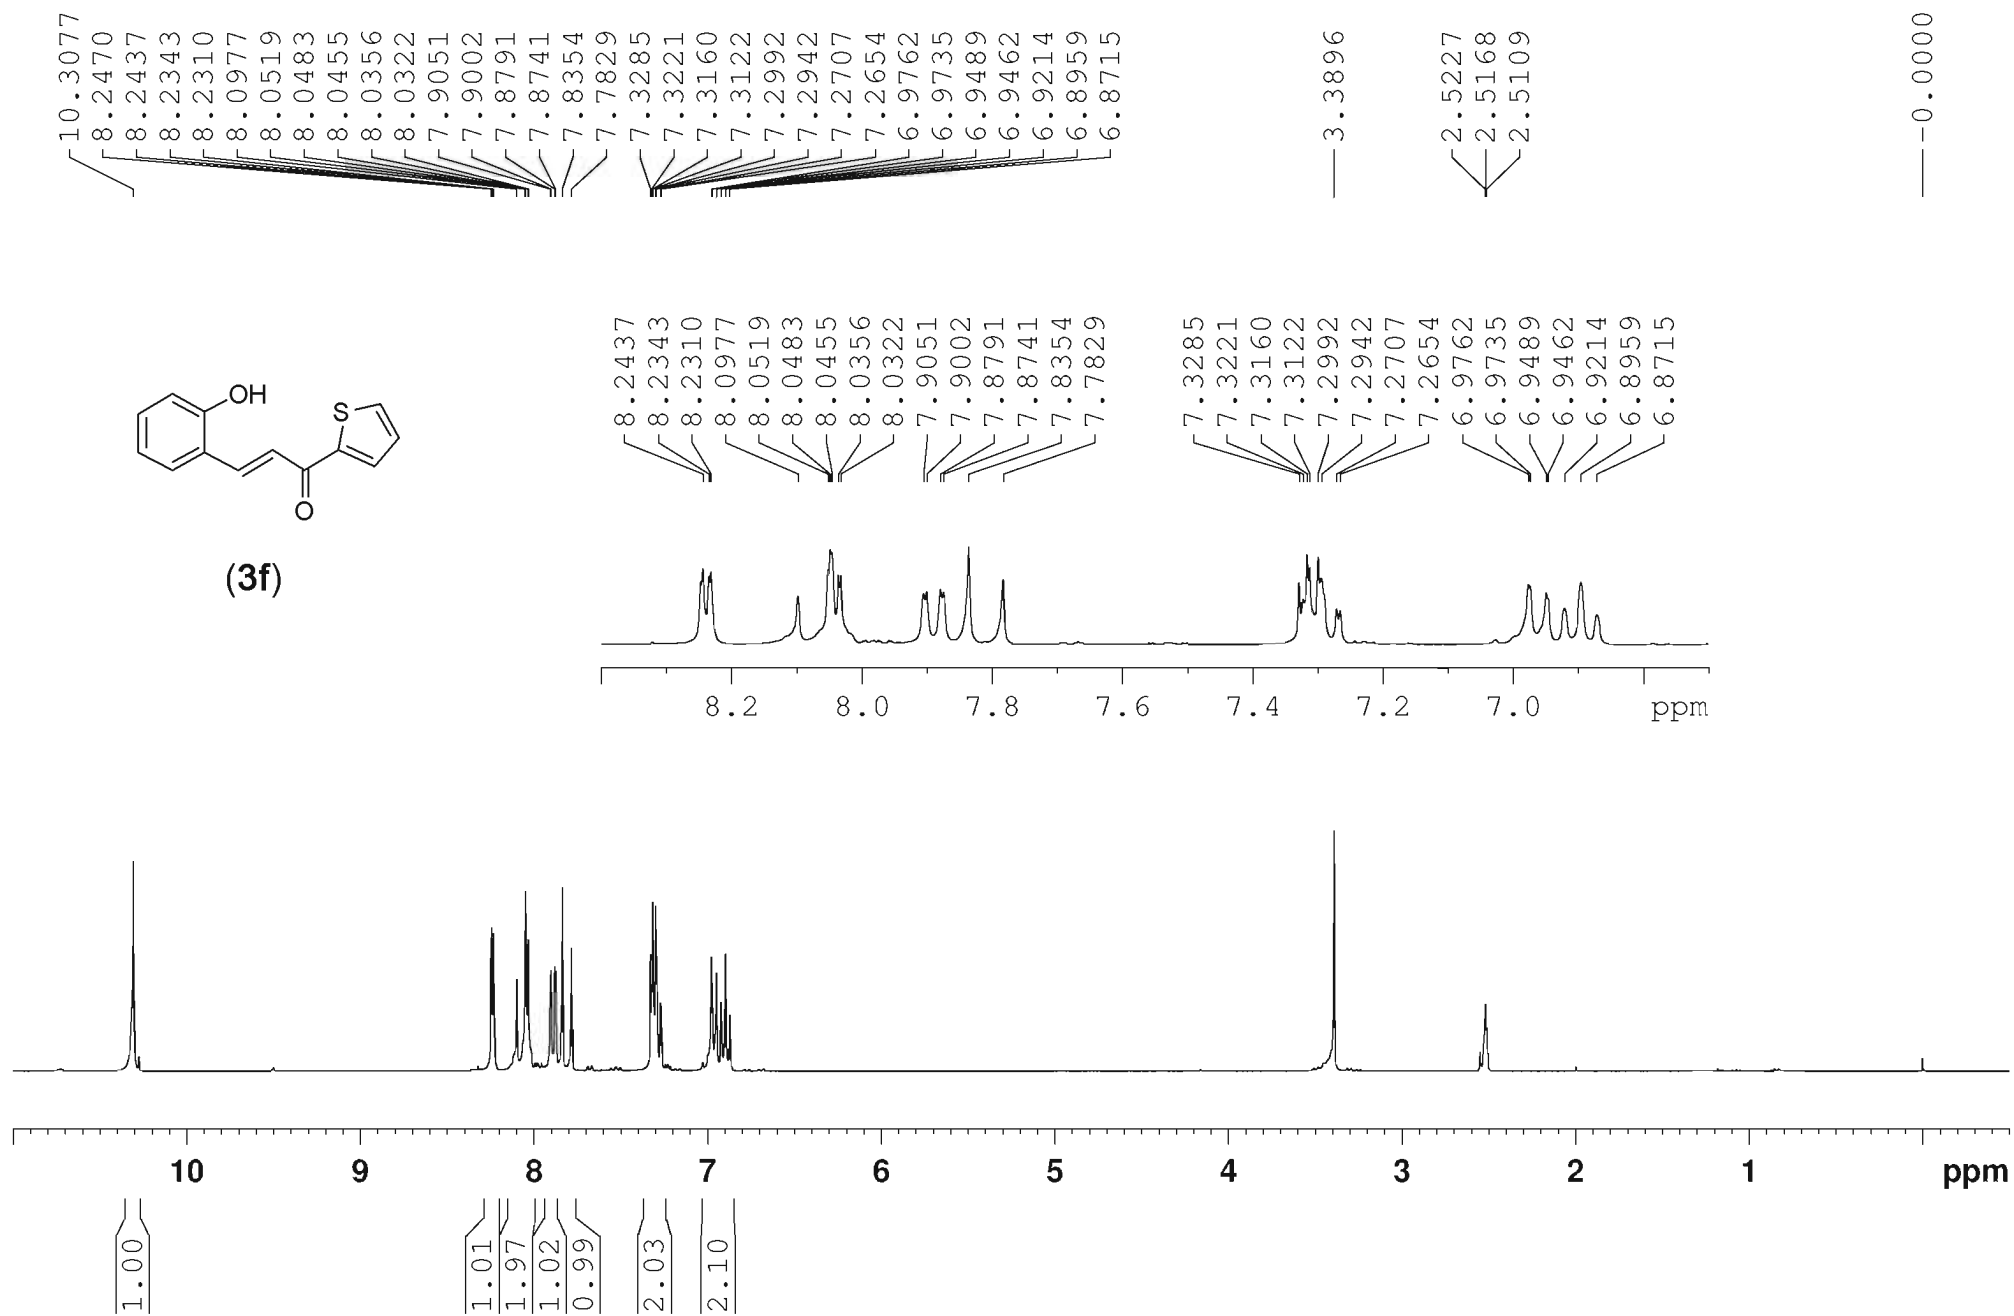

$^{13}\text{C}$  NMR (75MHz, DMSO- $\text{d}_6$ )

— 181.8306

— 157.2981

— 145.7356

— 138.5689

— 135.1371

— 133.0850

— 132.1649

— 128.9001

— 128.5908

— 121.2353

— 120.6593

— 119.4292

— 116.2906

40.3760

40.1041

39.8279

39.5491

39.2724

38.9929

38.7073

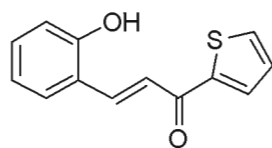

(3f)

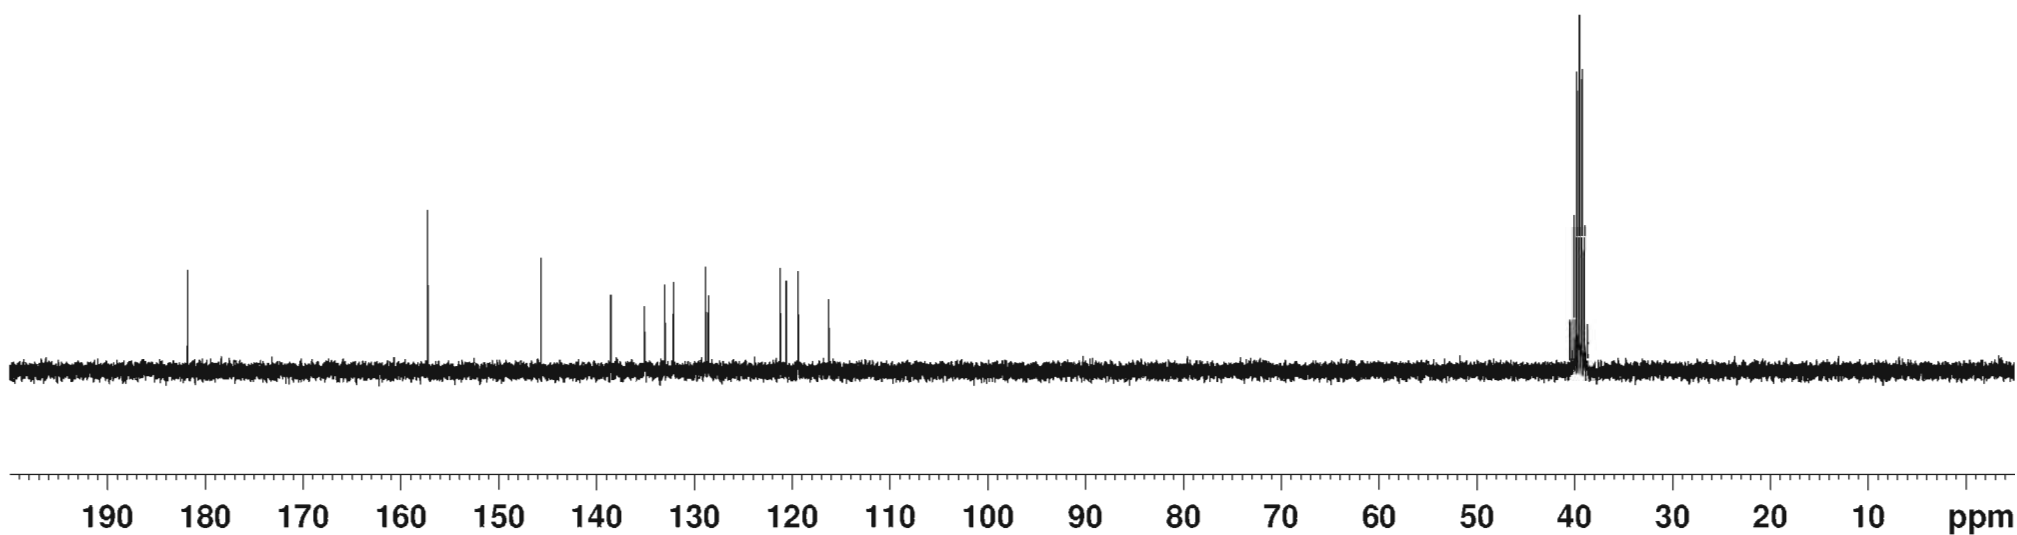

$^1\text{H}$  NMR (300MHz,  $\text{CDCl}_3$ )

7.8995  
7.8447  
7.6311  
7.4850  
7.4805  
7.4598  
7.4546  
7.2901  
7.2846  
7.2599  
7.2386  
7.2331  
7.0860  
7.0313  
6.9520  
6.9251  
6.9001  
6.8967

2.4366

0.0000

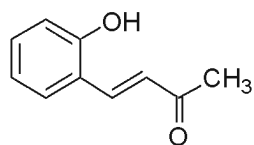

(3g)

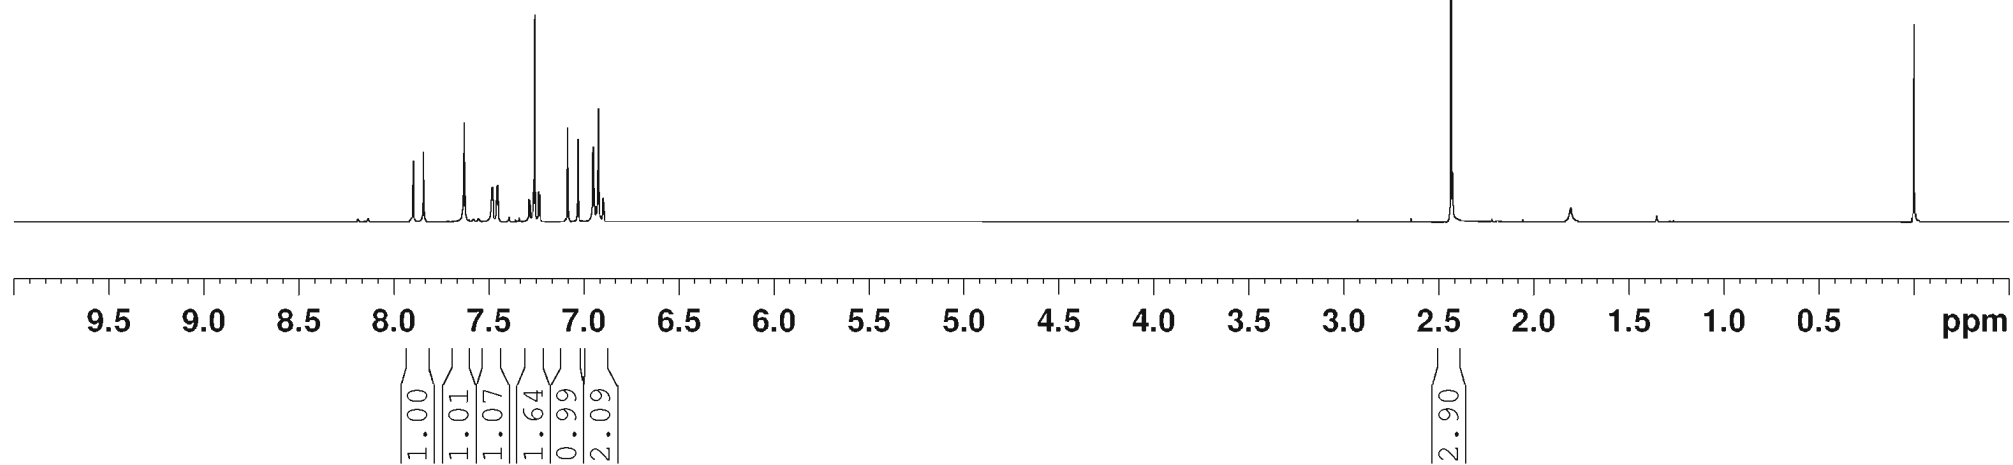

$^{13}\text{C}$  NMR (75MHz,  $\text{CDCl}_3$ )

— 201.3680

— 156.1141

— 141.0112

— 131.9369

— 129.7447

— 127.6877

— 121.4674

— 120.6256

— 116.6008

— 77.4207

— 76.9969

— 76.5741

— 26.7821

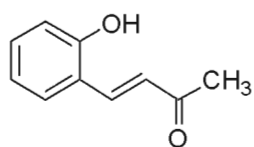

(3g)

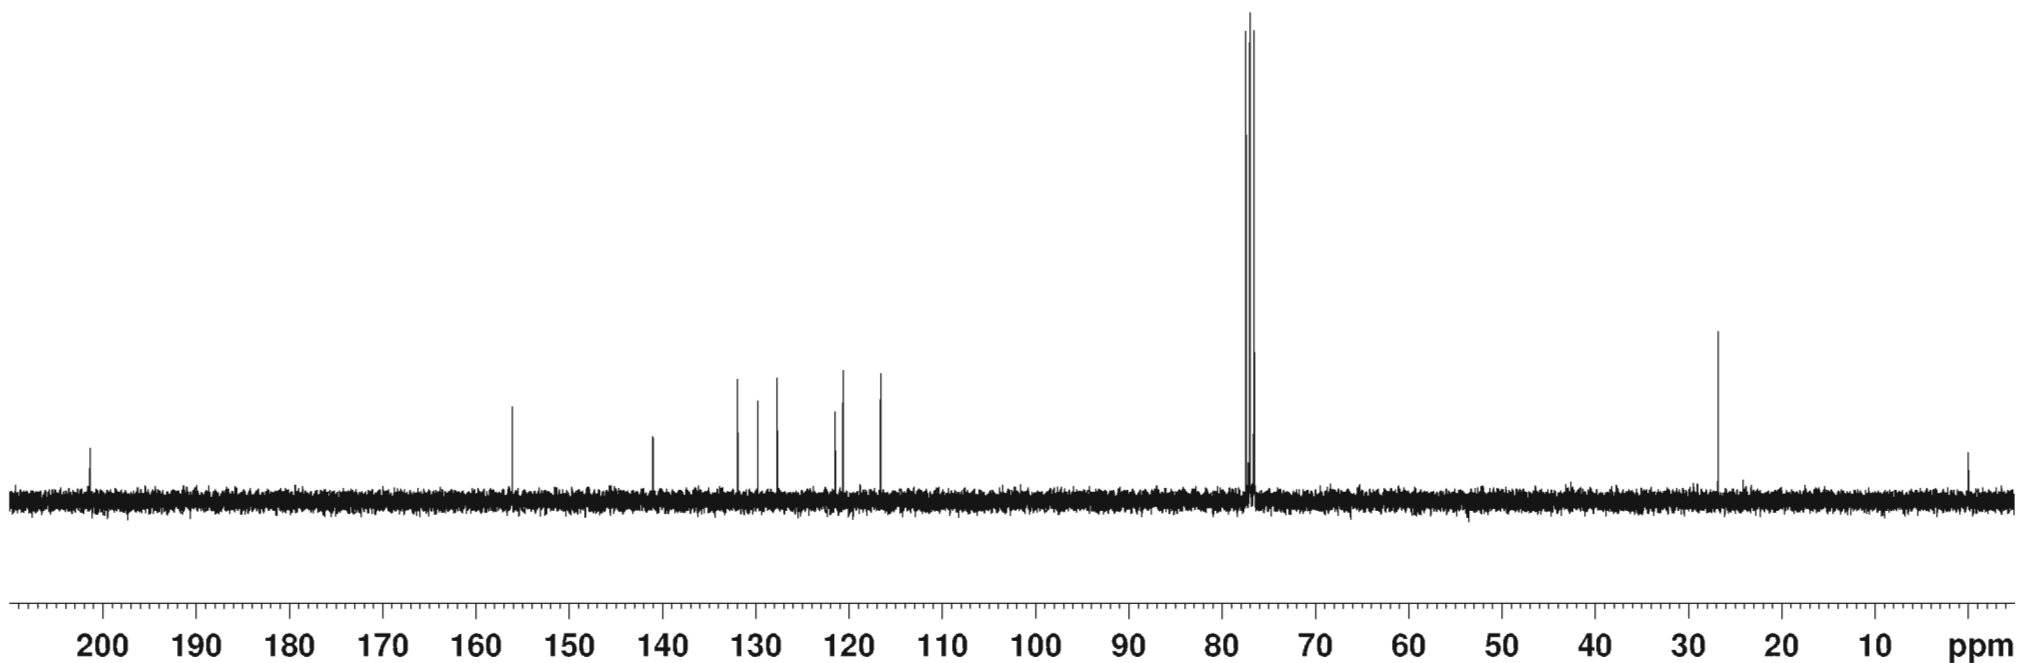

$^1\text{H}$  NMR (300MHz,  $\text{CDCl}_3$ )

7.9868  
7.7388  
7.7333  
7.7109  
7.7065  
7.6364  
7.6103  
7.3733  
7.3486  
7.3373  
7.3345  
7.3155  
7.2460  
7.1923  
7.1693  
7.1653  
7.1478  
7.1421  
7.1360  
7.0735  
7.0702  
7.0504  
7.0466  
7.0235  
7.0202  
6.9445  
6.9384  
6.9223  
6.9185  
6.9124  
6.8971  
6.8907  
5.6851  
5.6718  
5.1729  
5.1597

— 0.0001

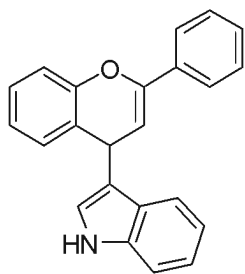

(5a)

7.711  
7.707  
7.636  
7.610  
7.373  
7.349  
7.337  
7.335  
7.316  
7.246  
7.192  
7.169  
7.165  
7.148  
7.142  
7.136  
7.074  
7.070  
7.050  
7.047  
7.024  
7.020  
6.944  
6.938  
6.922  
6.918  
6.912  
6.897  
6.891

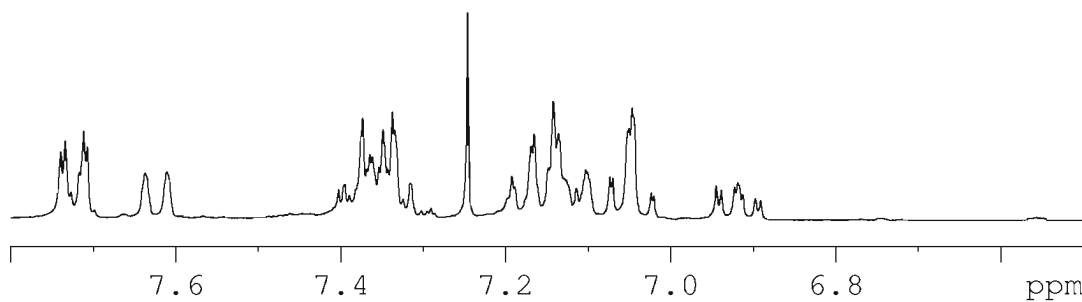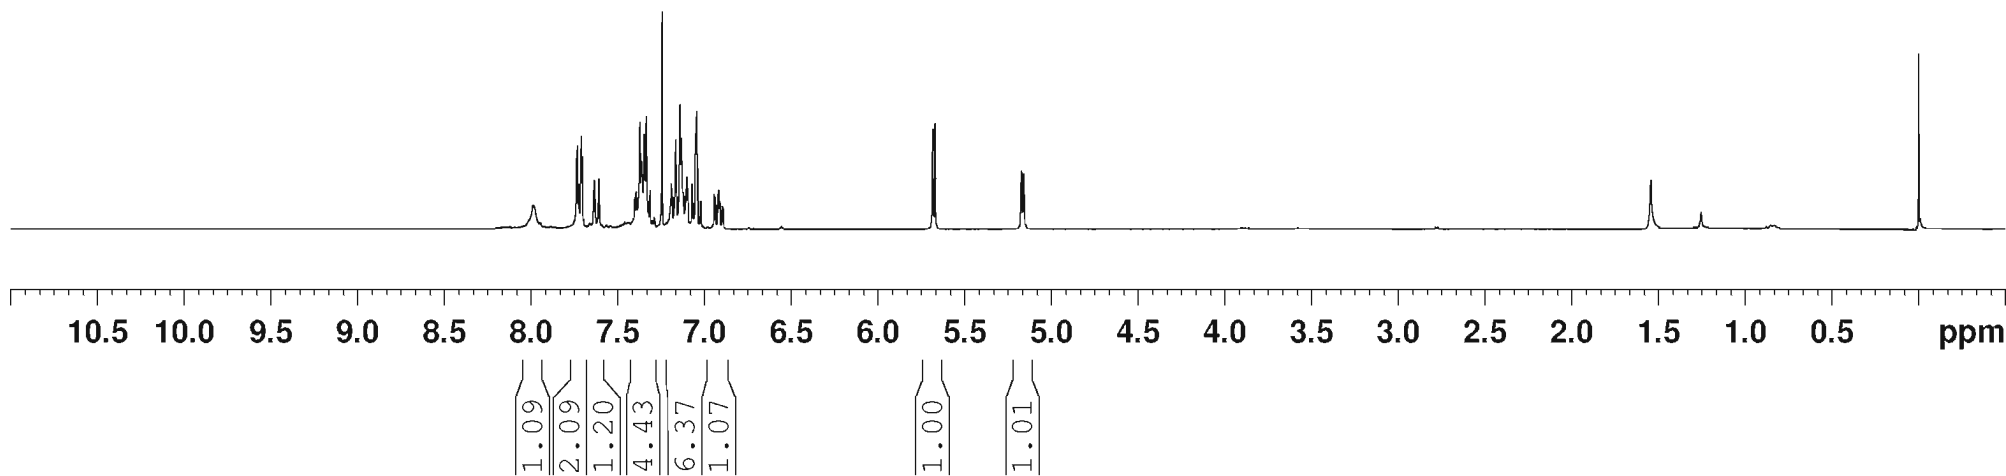

$^{13}\text{C}$  NMR (75MHz,  $\text{CDCl}_3$ )

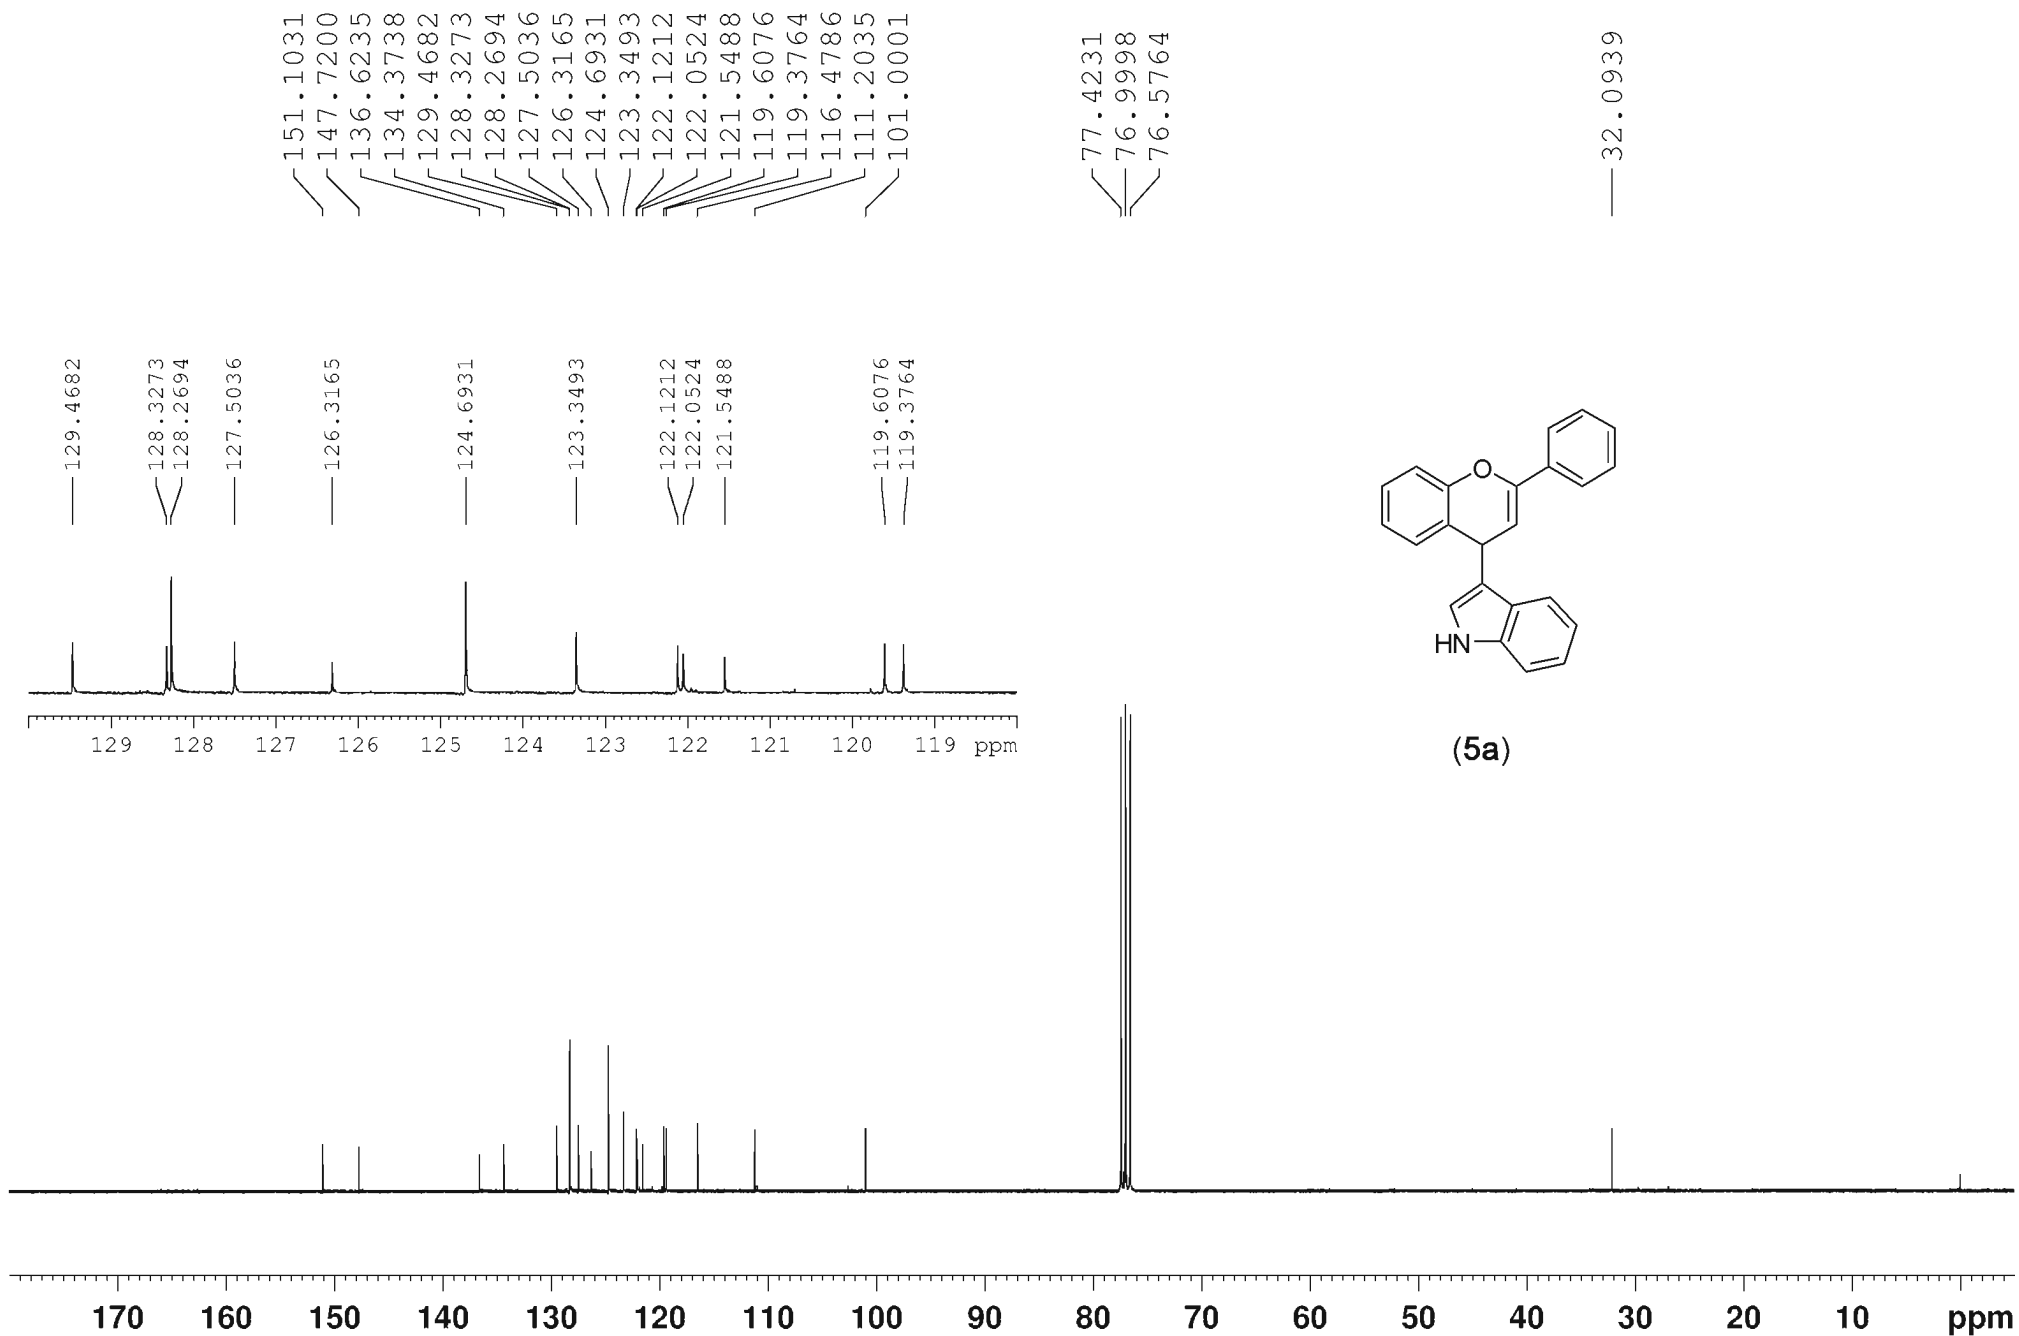



$^1\text{H}$  NMR (300MHz,  $\text{CDCl}_3$ )

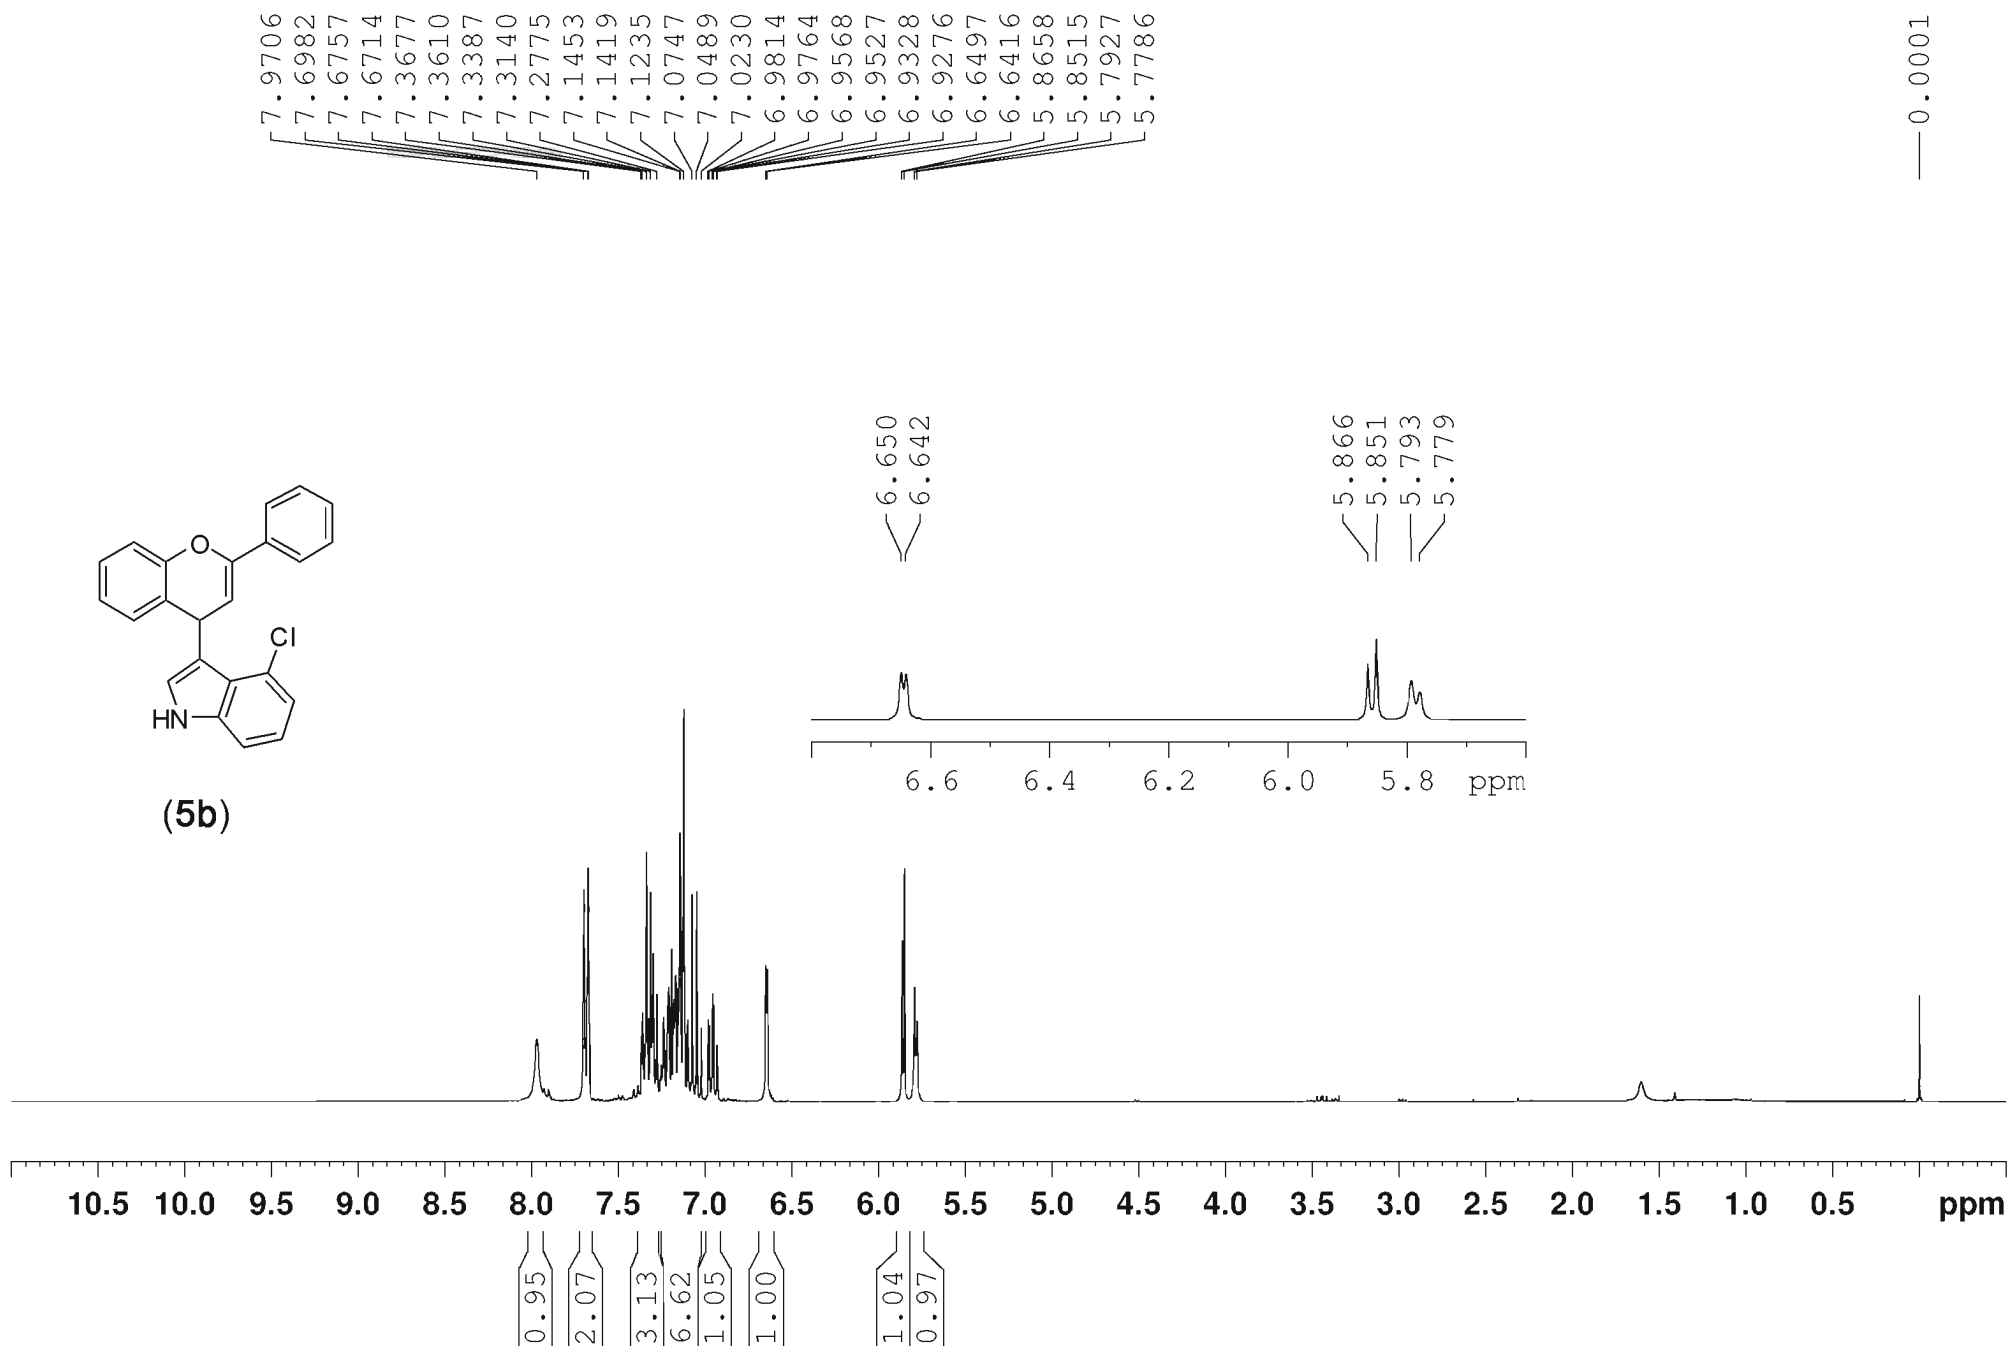

$^{13}\text{C}$  NMR (75MHz,  $\text{CDCl}_3$ )

151.2518  
146.8882  
137.4772  
134.3846  
129.9707  
128.2448  
127.4279  
125.8871  
125.0943  
124.5721  
124.0372  
123.2919  
123.0801  
123.0197  
122.4735  
120.9199  
116.4469  
110.1458  
102.0614

77.4222  
76.9985  
76.5753

31.2073

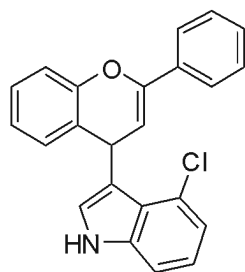

(5b)

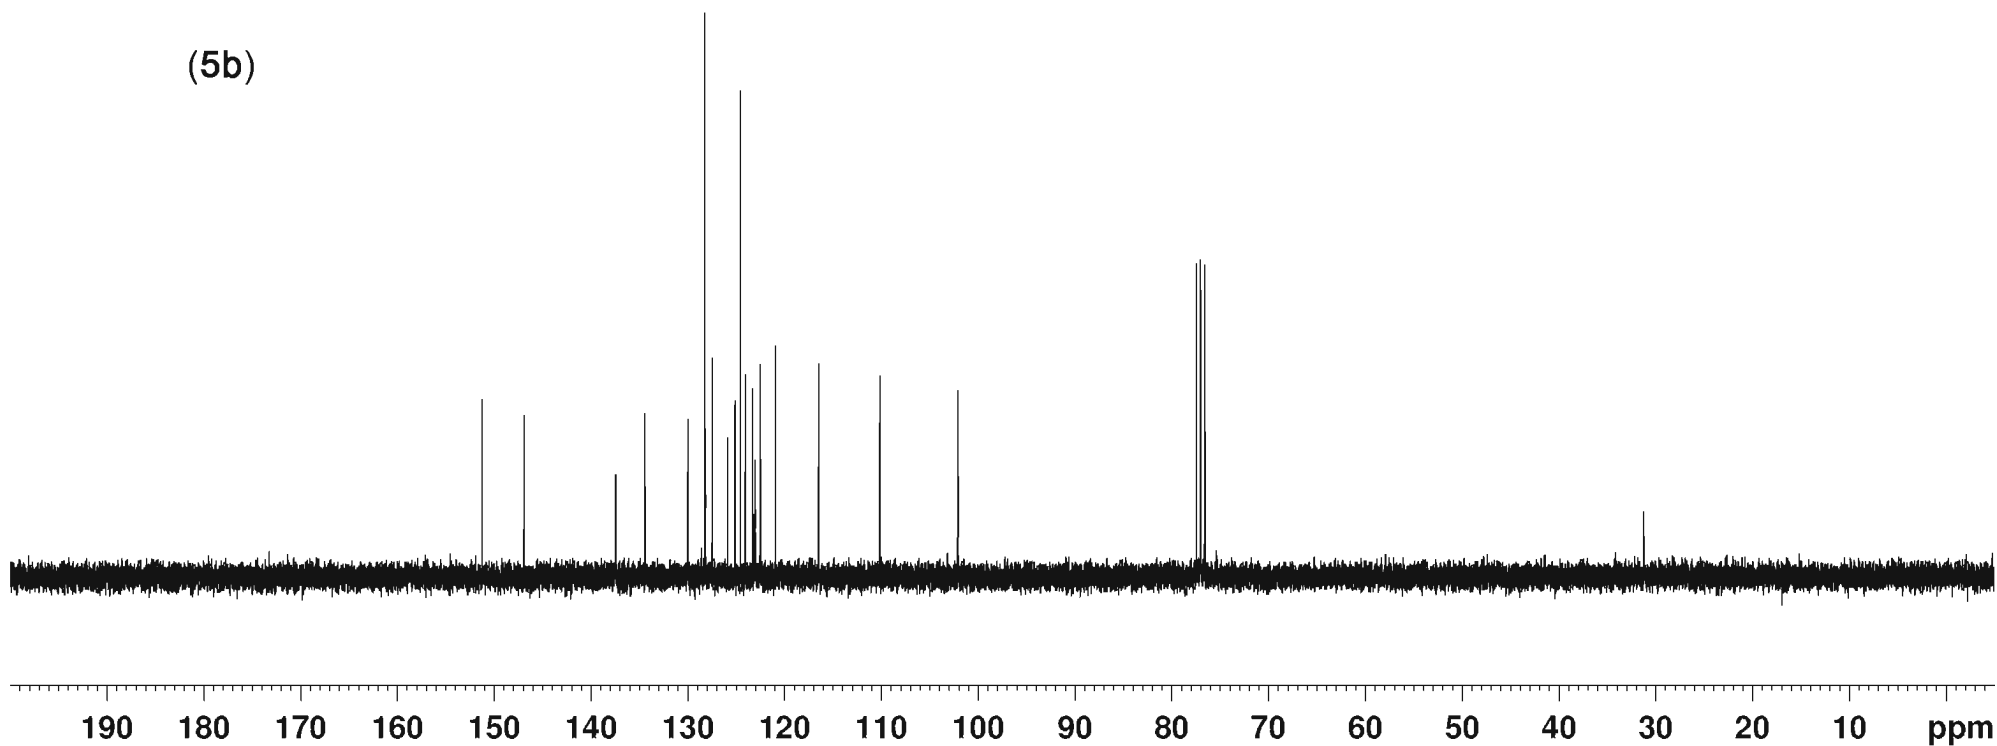

$^1\text{H}$  NMR (300 MHz,  $\text{CDCl}_3$ )

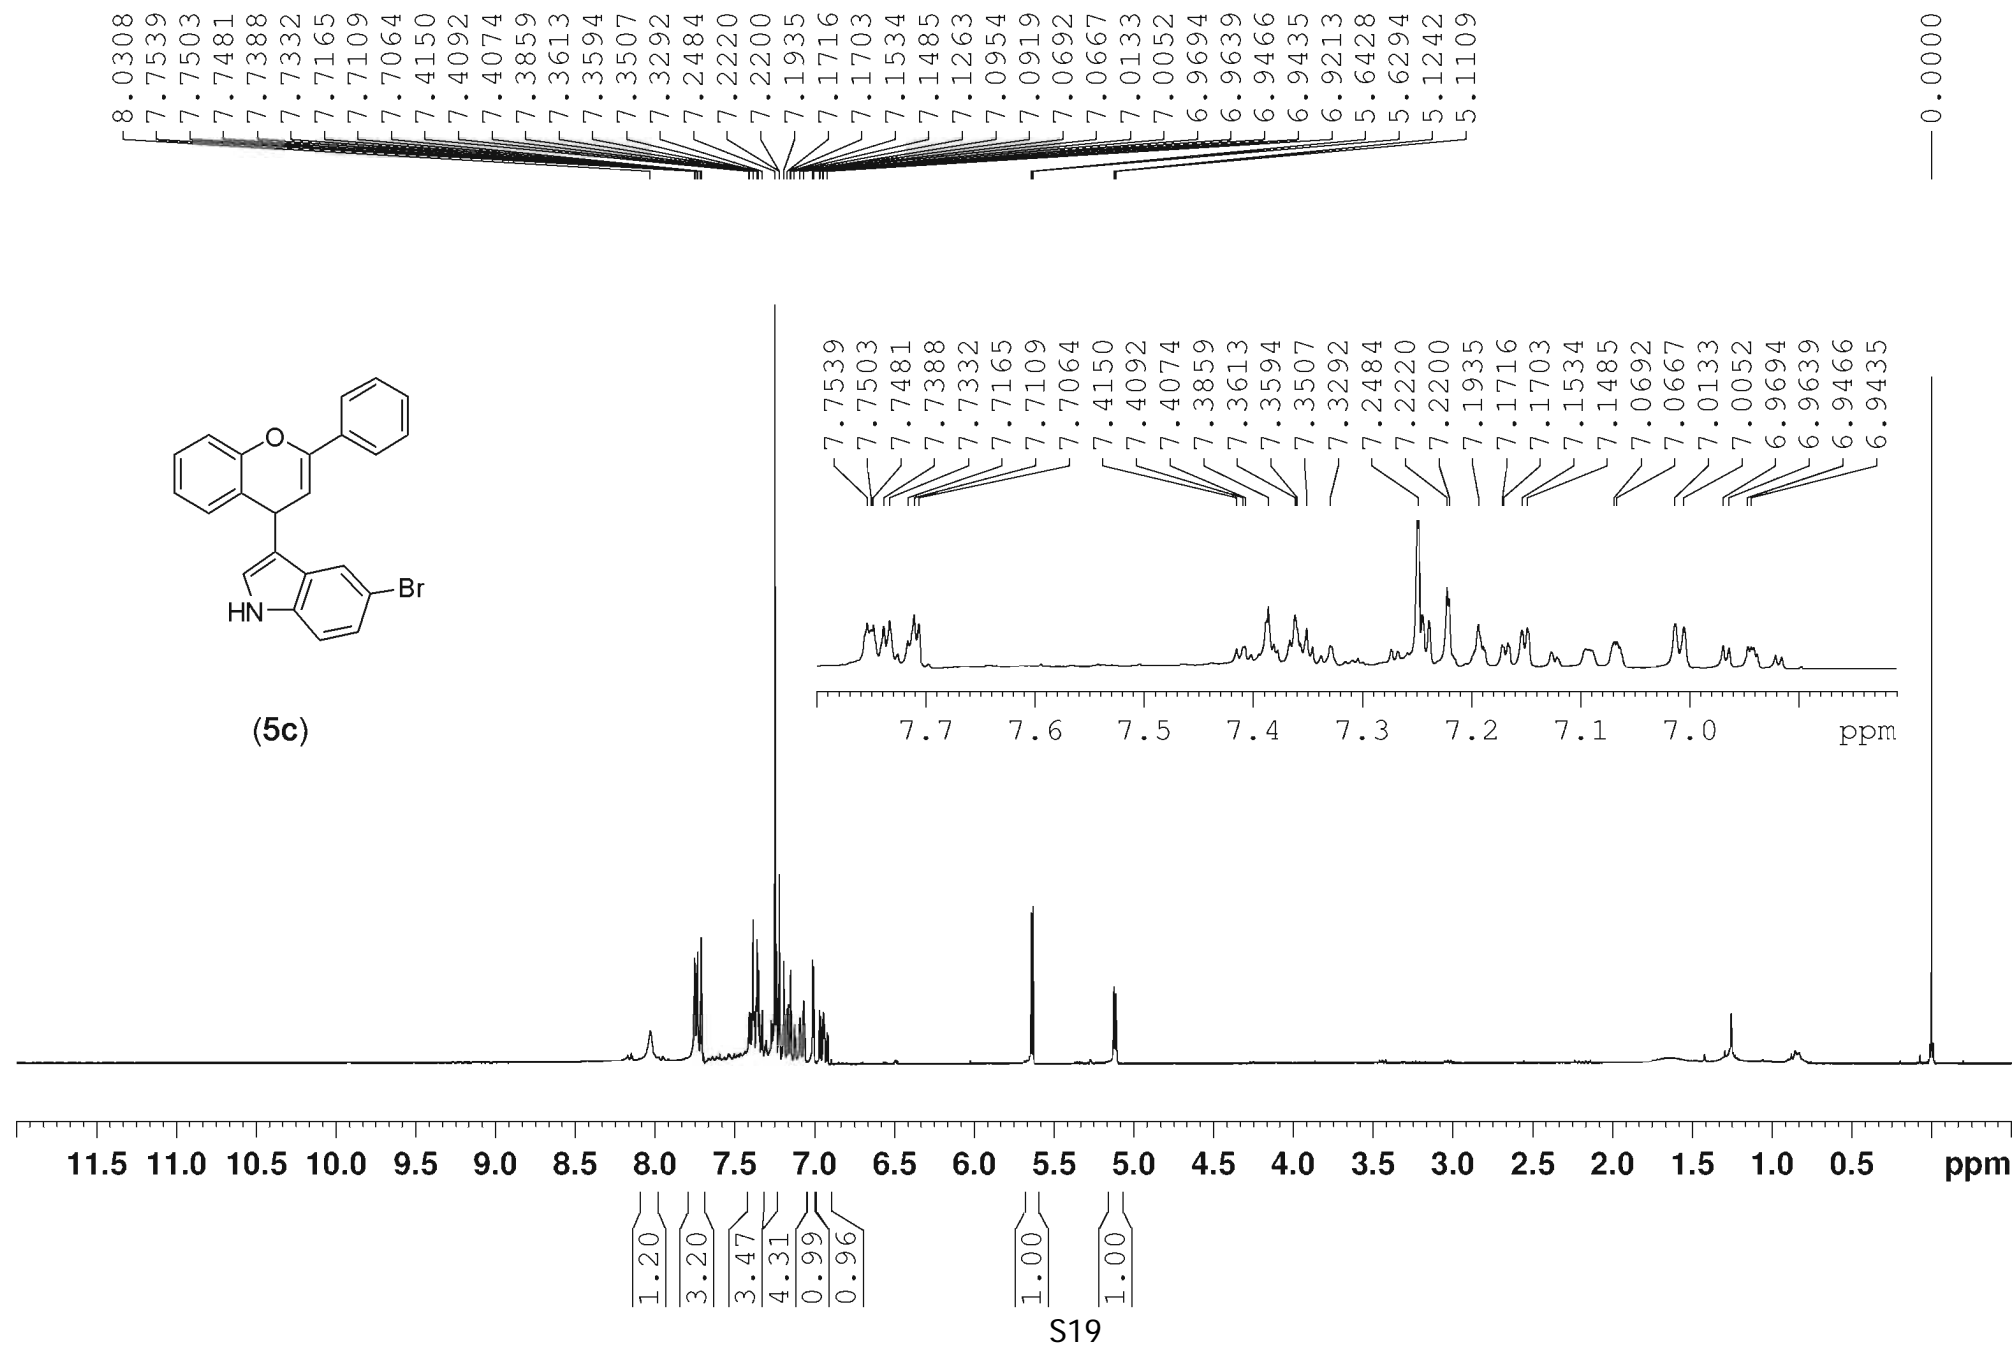

$^{13}\text{C}$  NMR (75 MHz,  $\text{CDCl}_3$ )

151.0827  
148.0093  
135.1526  
134.2537  
129.2773  
128.4500  
128.3151  
128.0400  
127.7070  
125.0671  
124.7292  
123.4904  
123.4558  
122.9685  
121.7883  
121.4333  
116.6535  
112.9584  
112.6662  
100.5395

77.4207  
76.9974  
76.5740

— 31.8365

— -0.0180

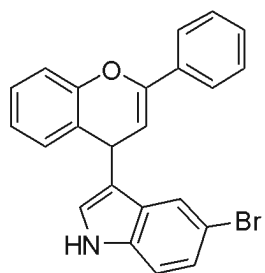

(5c)

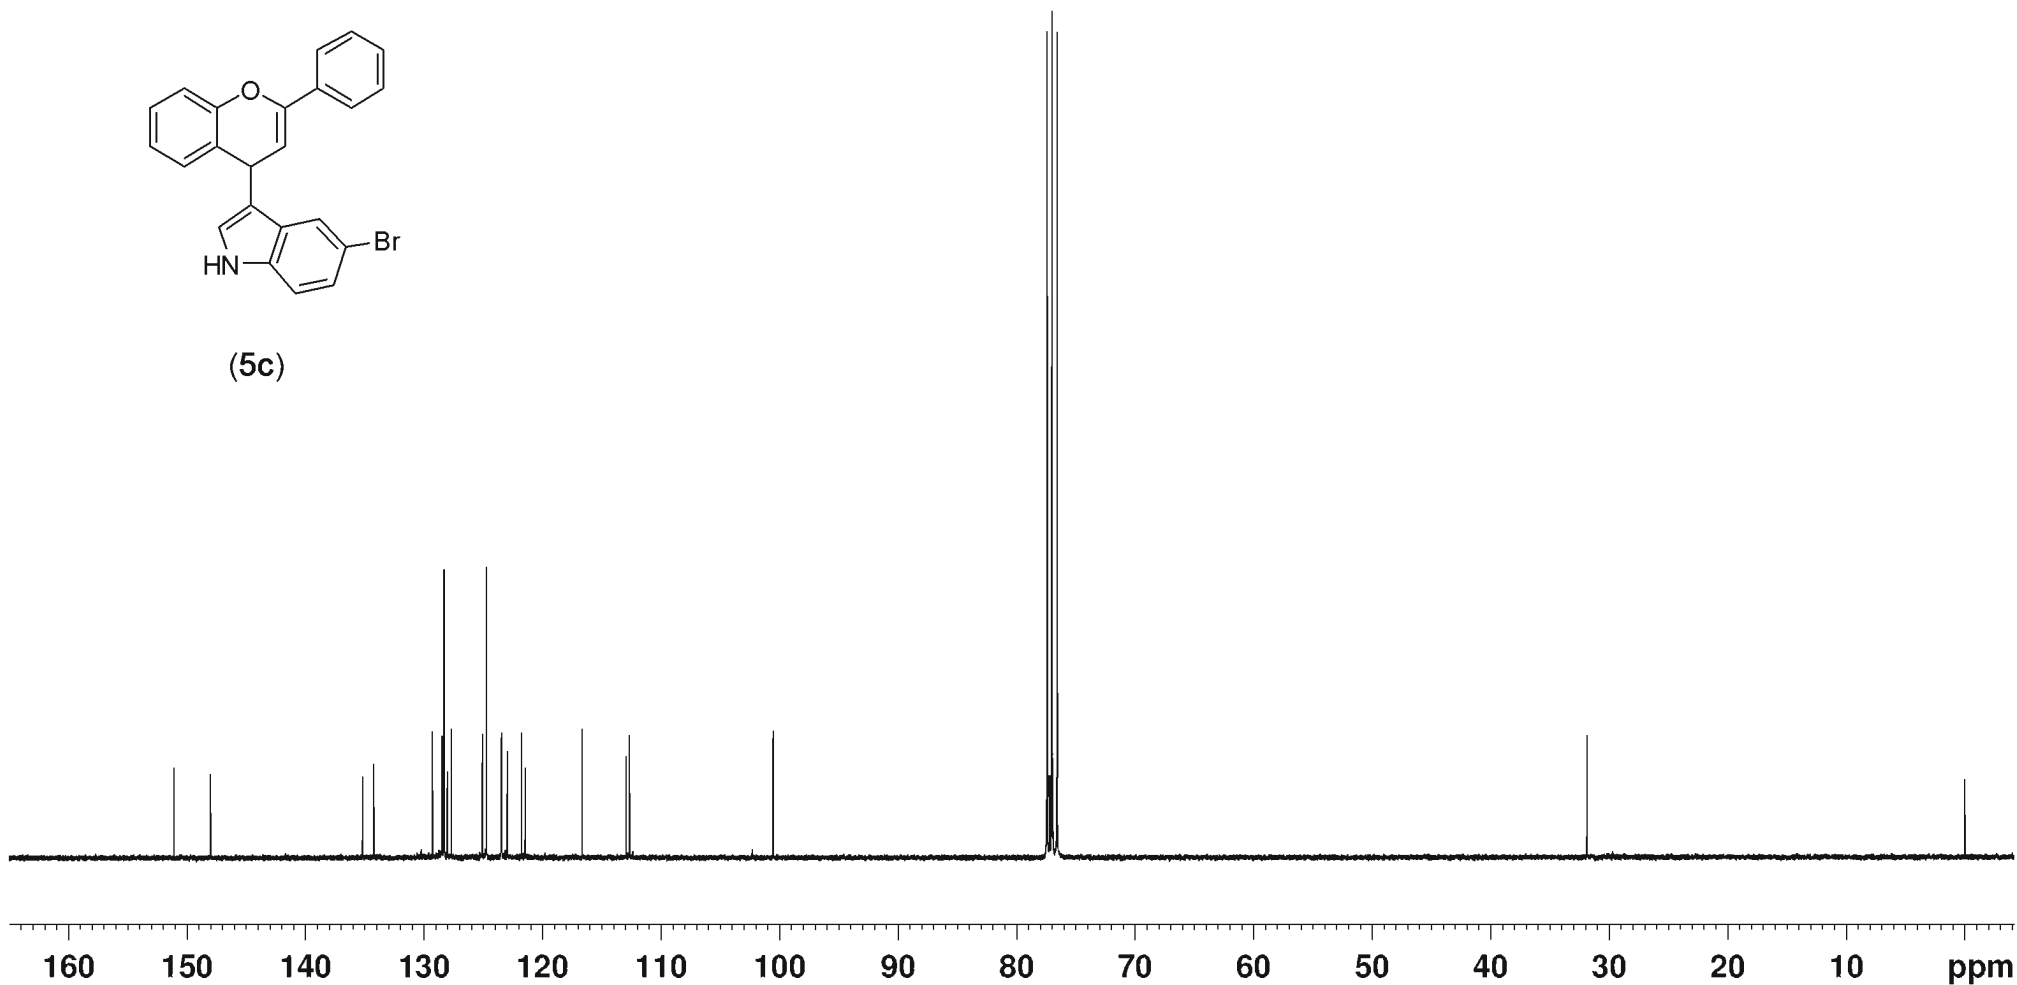

$^1\text{H}$  NMR (300MHz,  $\text{CDCl}_3$ )

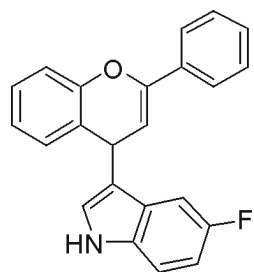

(5d)

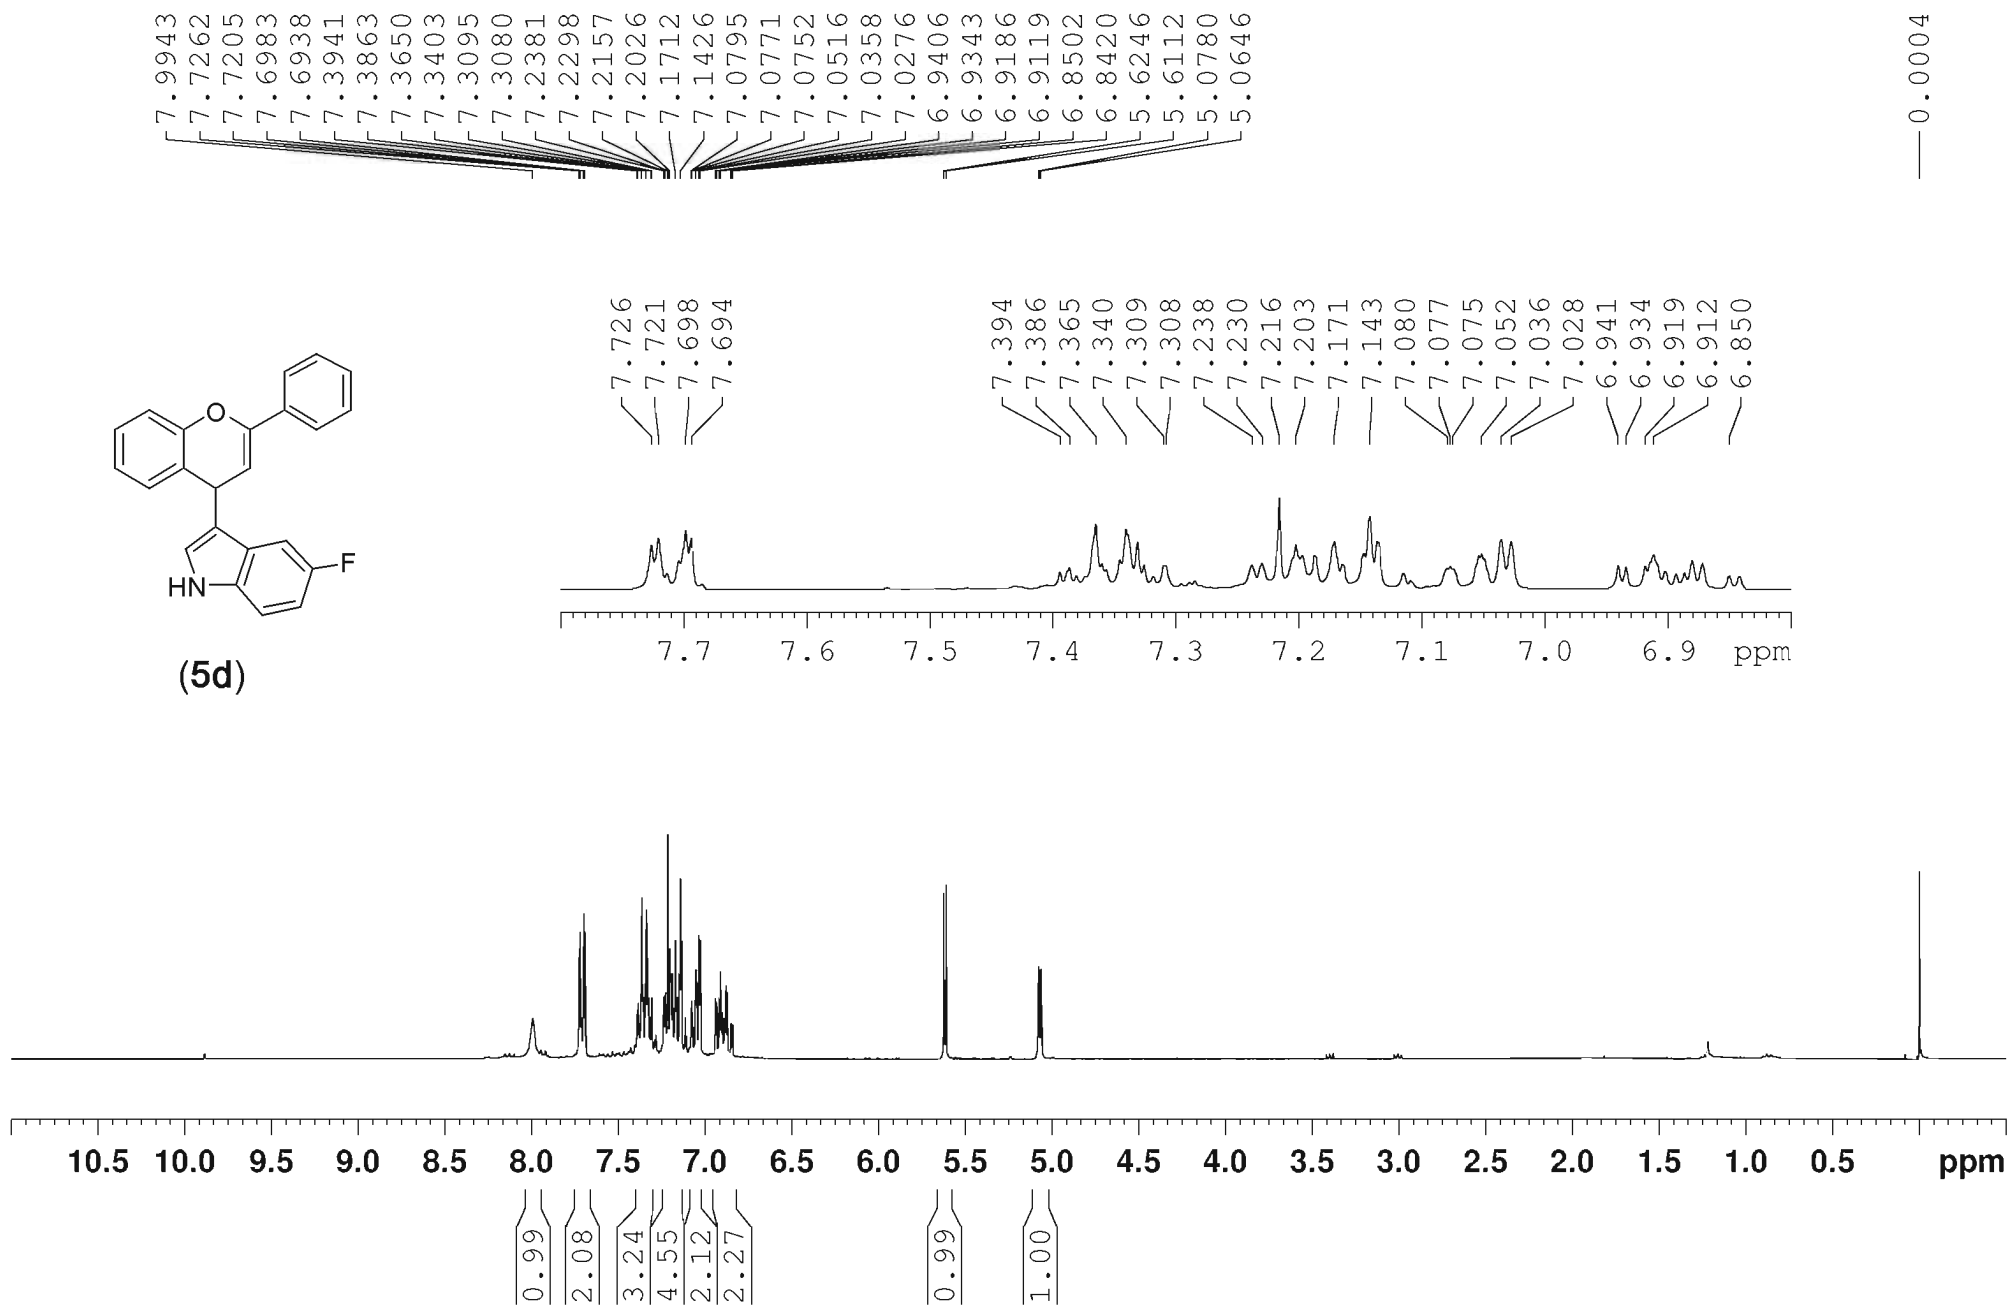

$^{13}\text{C}$  NMR (75MHz,  $\text{CDCl}_3$ )

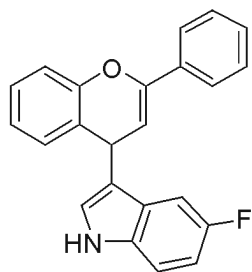

(5d)

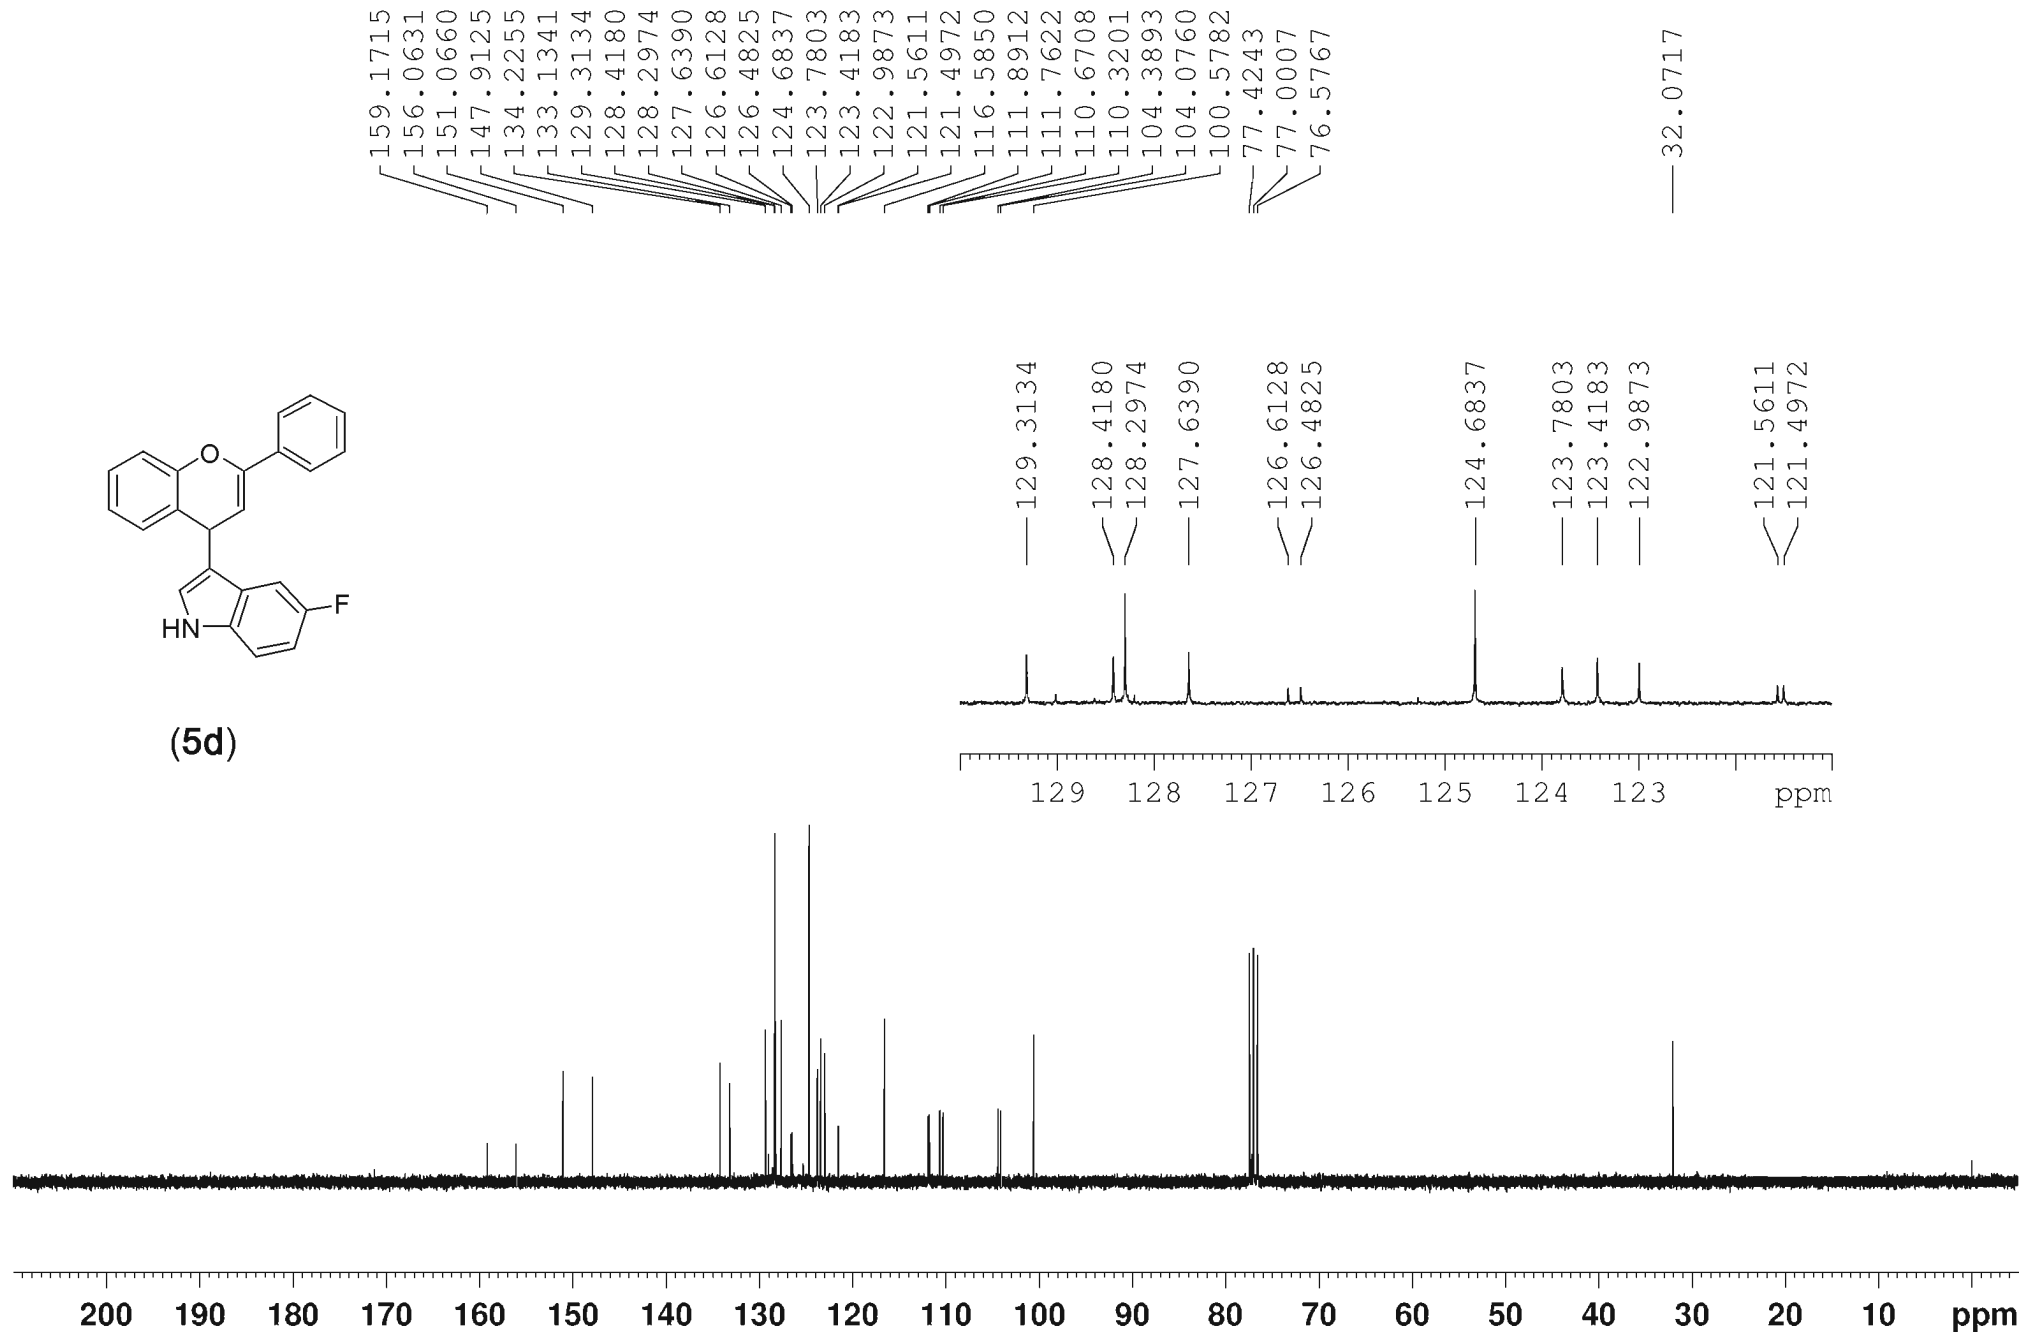

$^1\text{H}$  NMR (300MHz,  $\text{CDCl}_3$ )

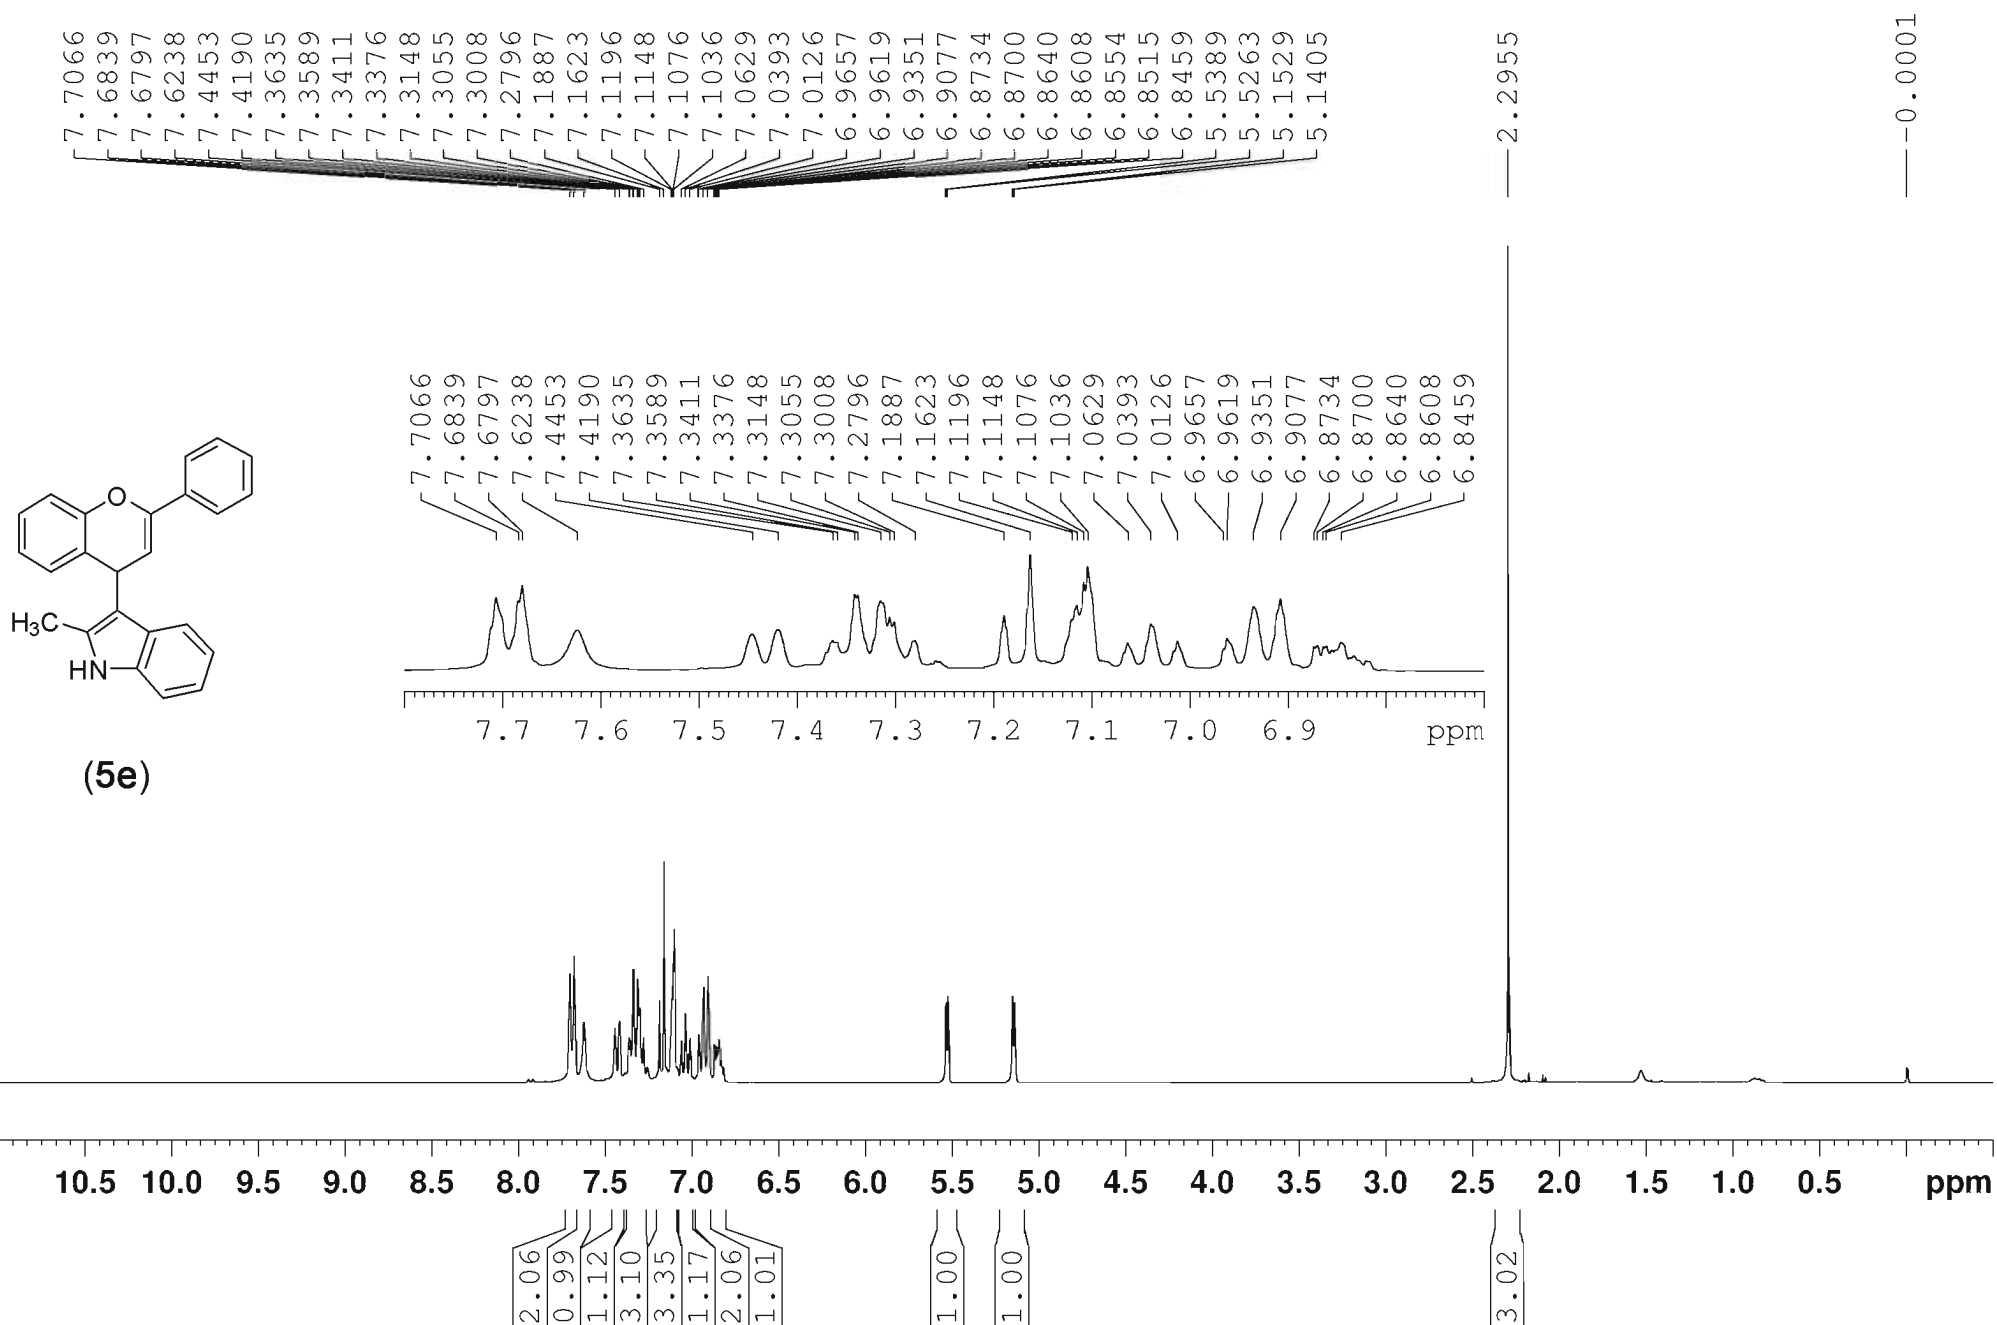

$^{13}\text{C}$  NMR (75MHz,  $\text{CDCl}_3$ )

151.1531  
147.5887  
135.0711  
134.3339  
131.4115  
129.3703  
128.2555  
127.7594  
127.3864  
124.5932  
123.3810  
123.2707  
120.9726  
119.3577  
118.4998  
116.2590  
115.8721  
110.1805  
100.8642

77.4225  
77.0013  
76.5760

30.9146

11.7897

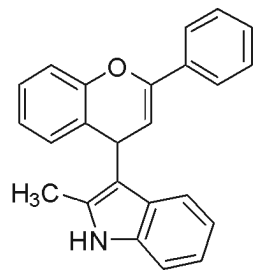

(5e)

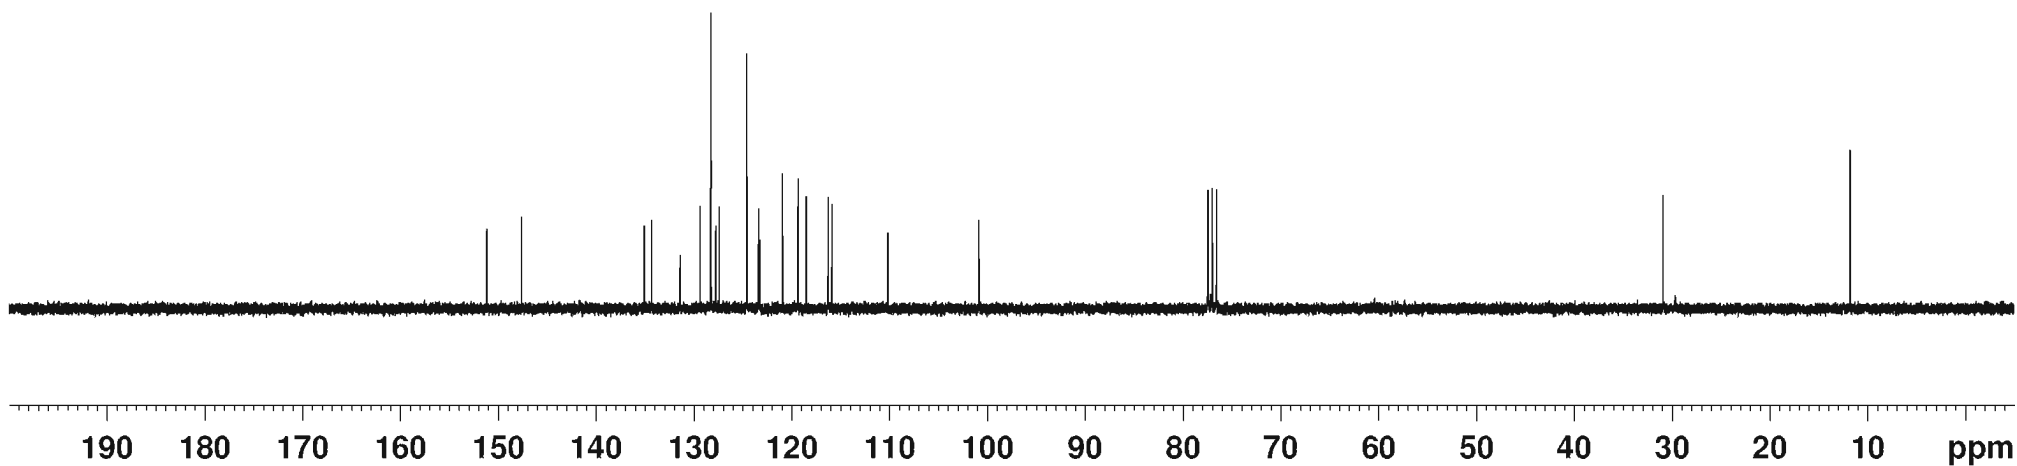



$^1\text{H}$  NMR (300MHz,  $\text{CDCl}_3$ )

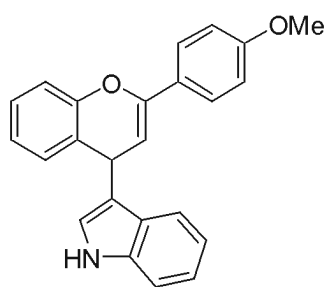

(5g)

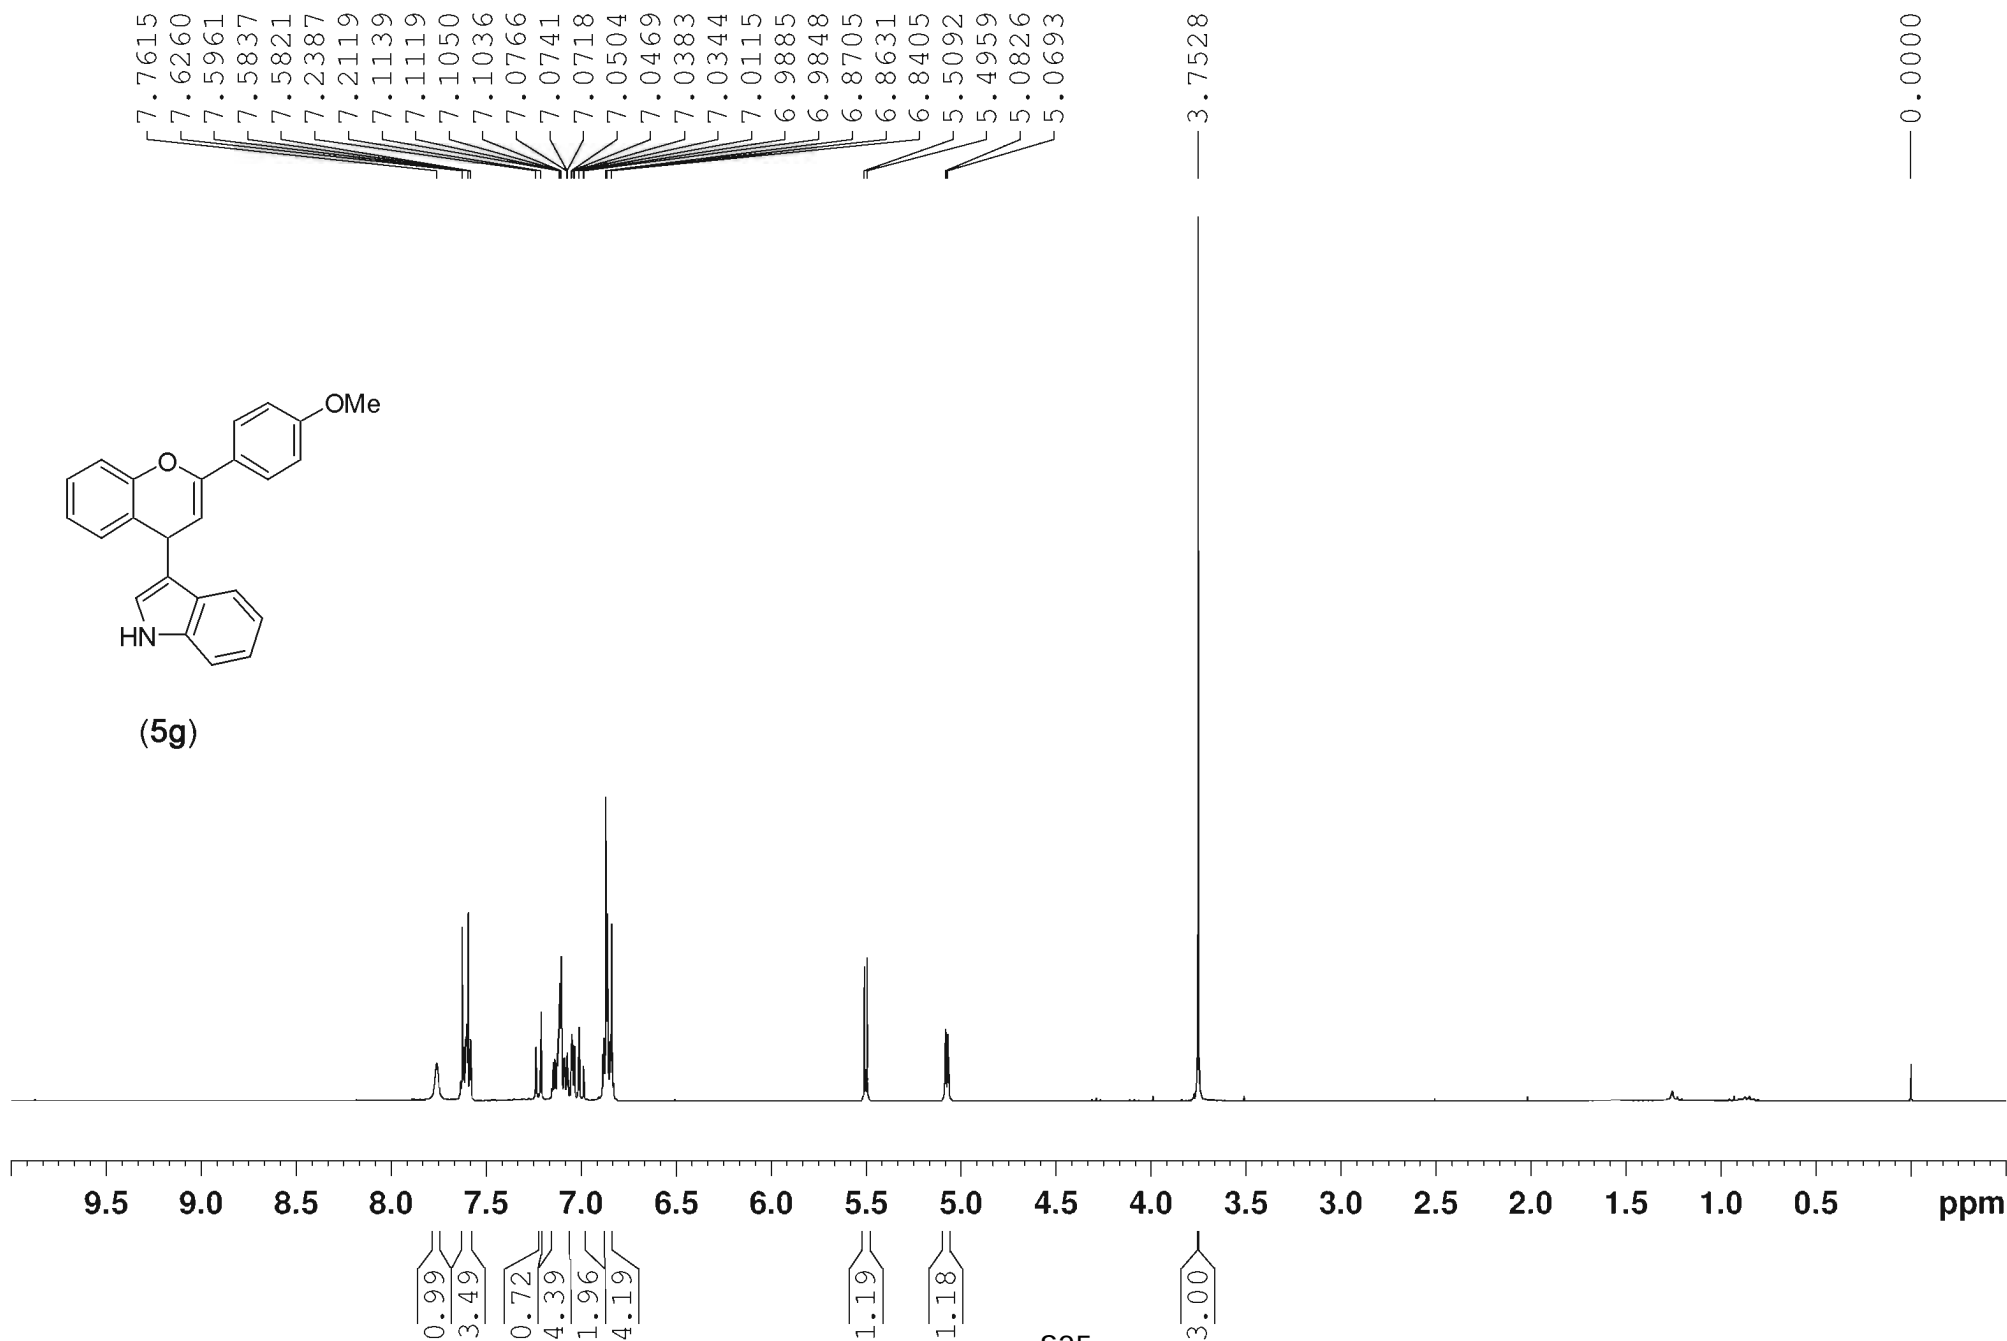

$^{13}\text{C}$  NMR (75 MHz,  $\text{CDCl}_3$ )

159.6913  
151.0862  
147.4475  
136.5252  
129.4269  
127.4004  
127.0272  
126.2380  
126.0100  
123.4696  
123.2347  
122.0214  
121.9835  
121.5057  
119.4756  
119.2984  
116.3845  
113.6192  
111.2004  
99.3423

77.4177  
76.9934  
76.5697

55.2199

31.9783

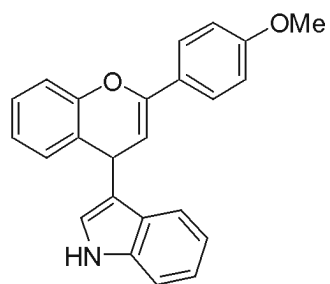

(5g)

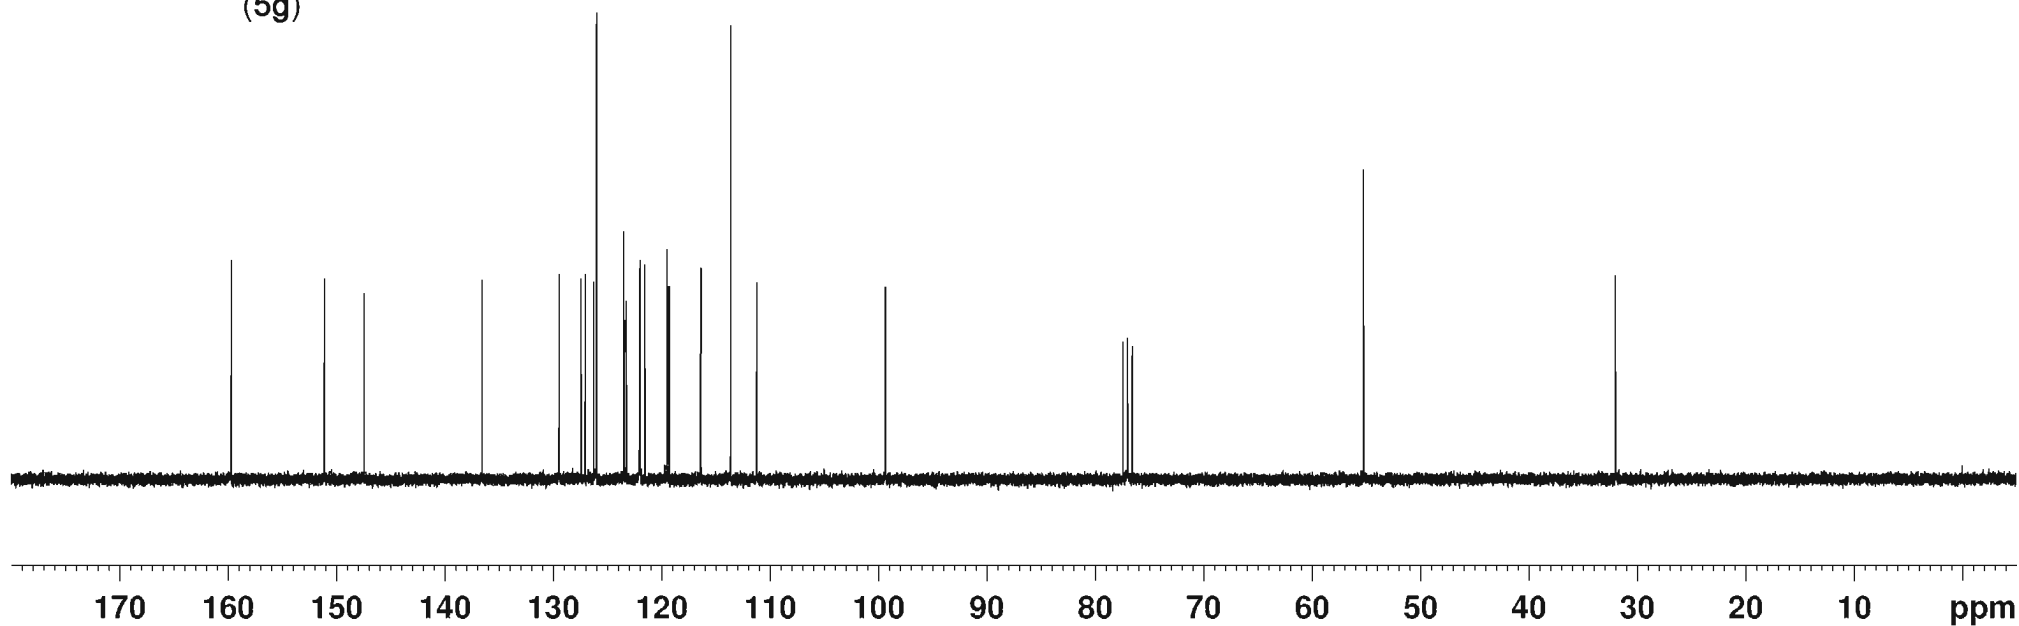

$^1\text{H}$  NMR (300MHz,  $\text{CDCl}_3$ )

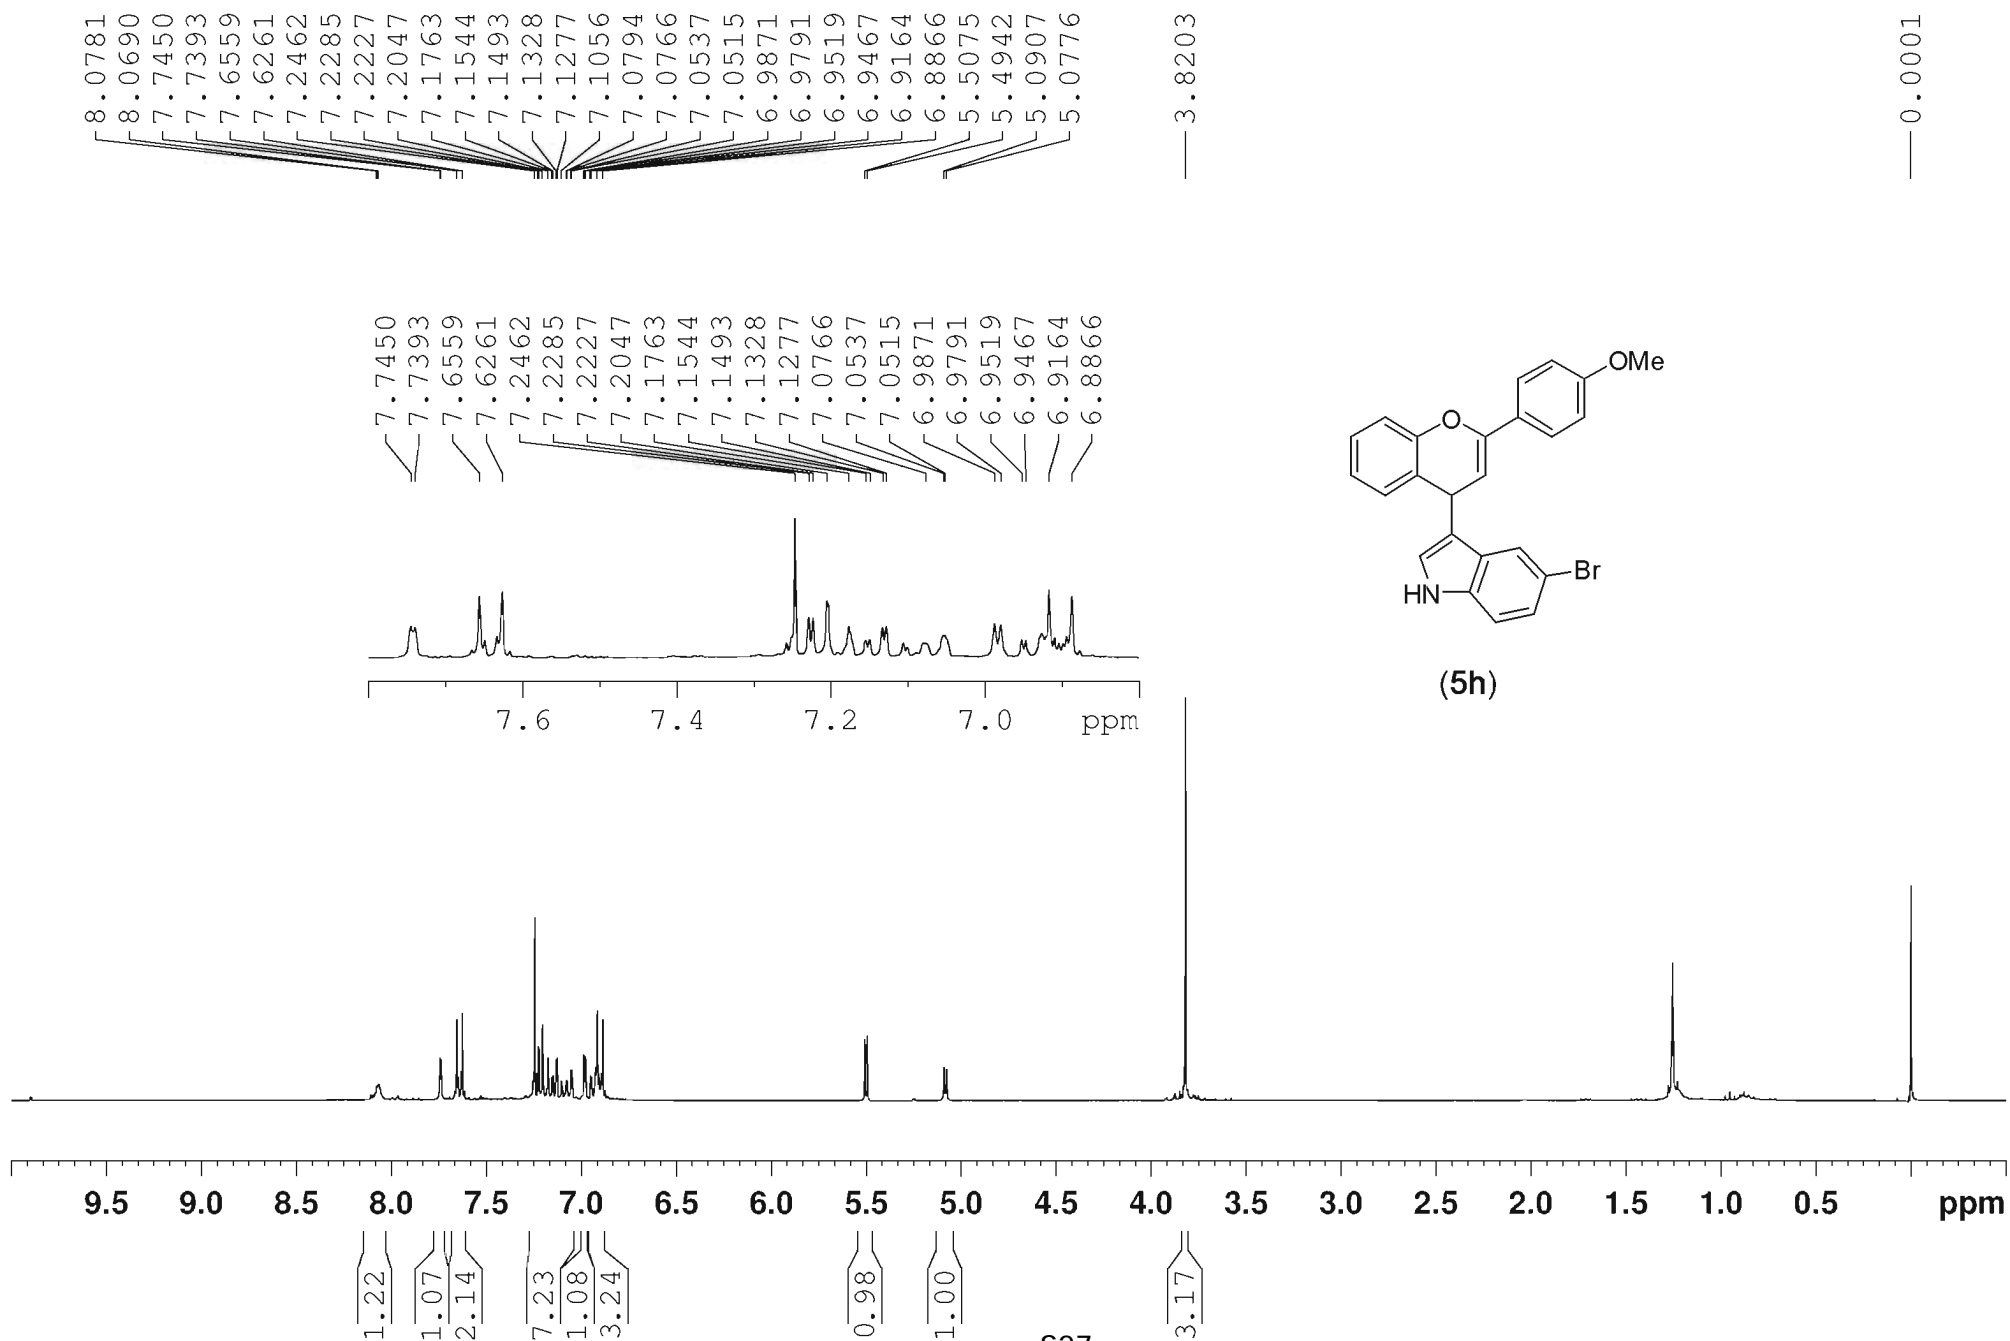

$^{13}\text{C}$  NMR (75MHz,  $\text{CDCl}_3$ )

159.8529  
151.1542  
147.8435  
135.1823  
129.2662  
128.0710  
127.6265  
126.9877  
126.1065  
125.0085  
123.4580  
123.3505  
123.1107  
121.8174  
121.5905  
116.6107  
113.6989  
112.9065  
112.6663  
98.9113

77.4223  
76.9990  
76.5758

55.3150

31.8282

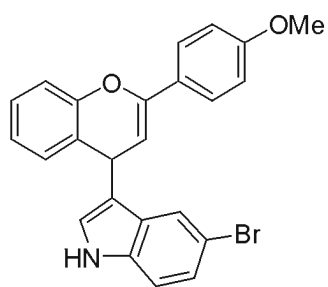

(5h)

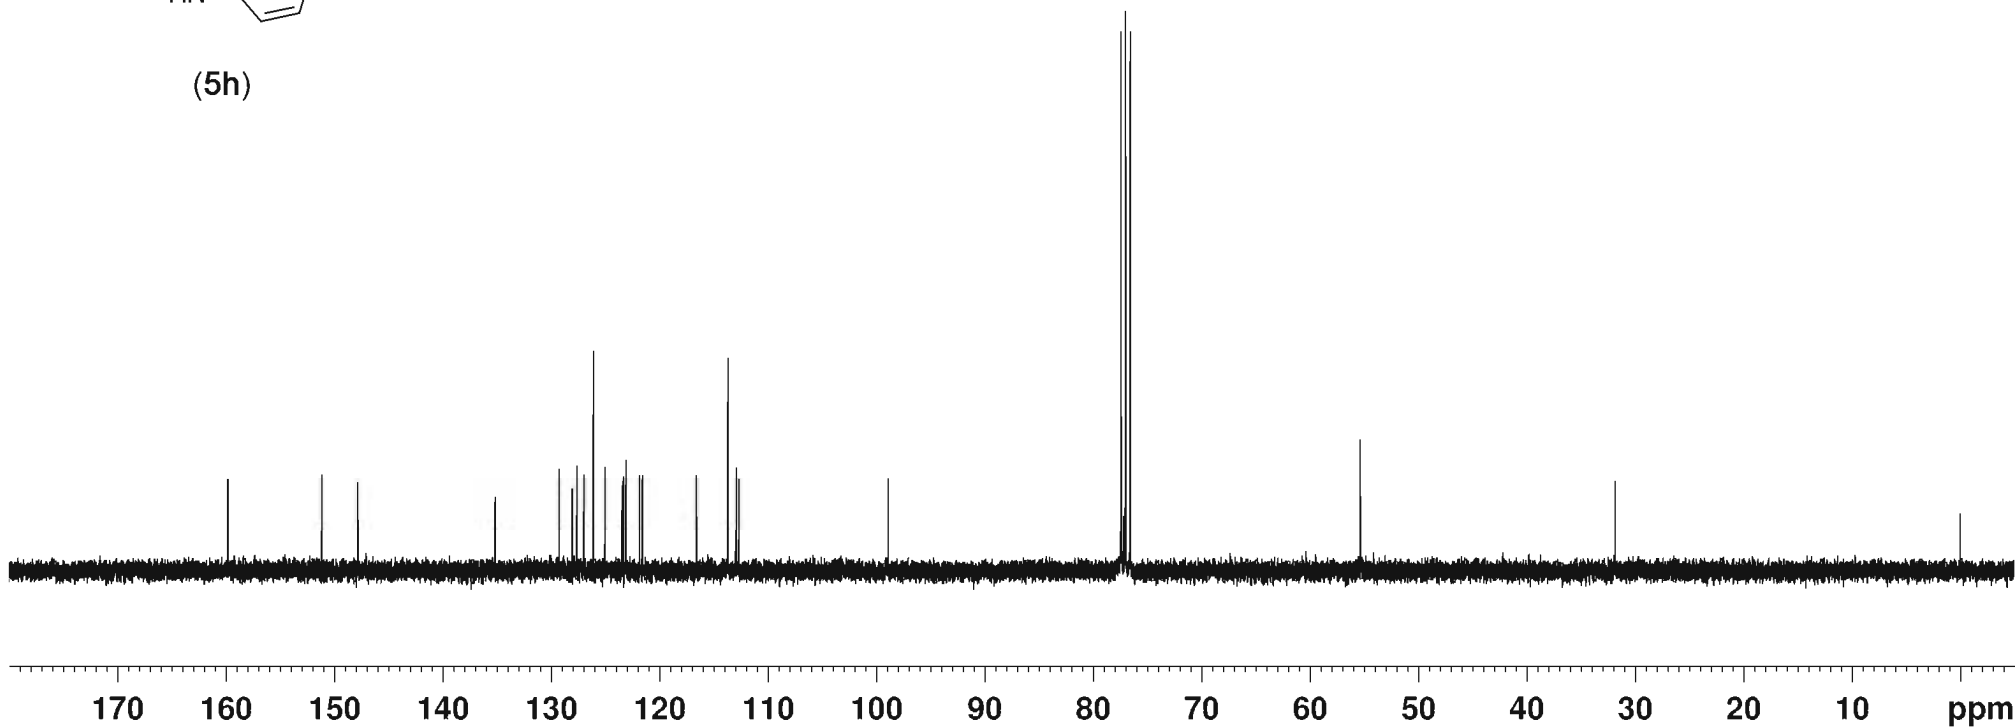

$^1\text{H}$  NMR (300MHz,  $\text{CDCl}_3$ )

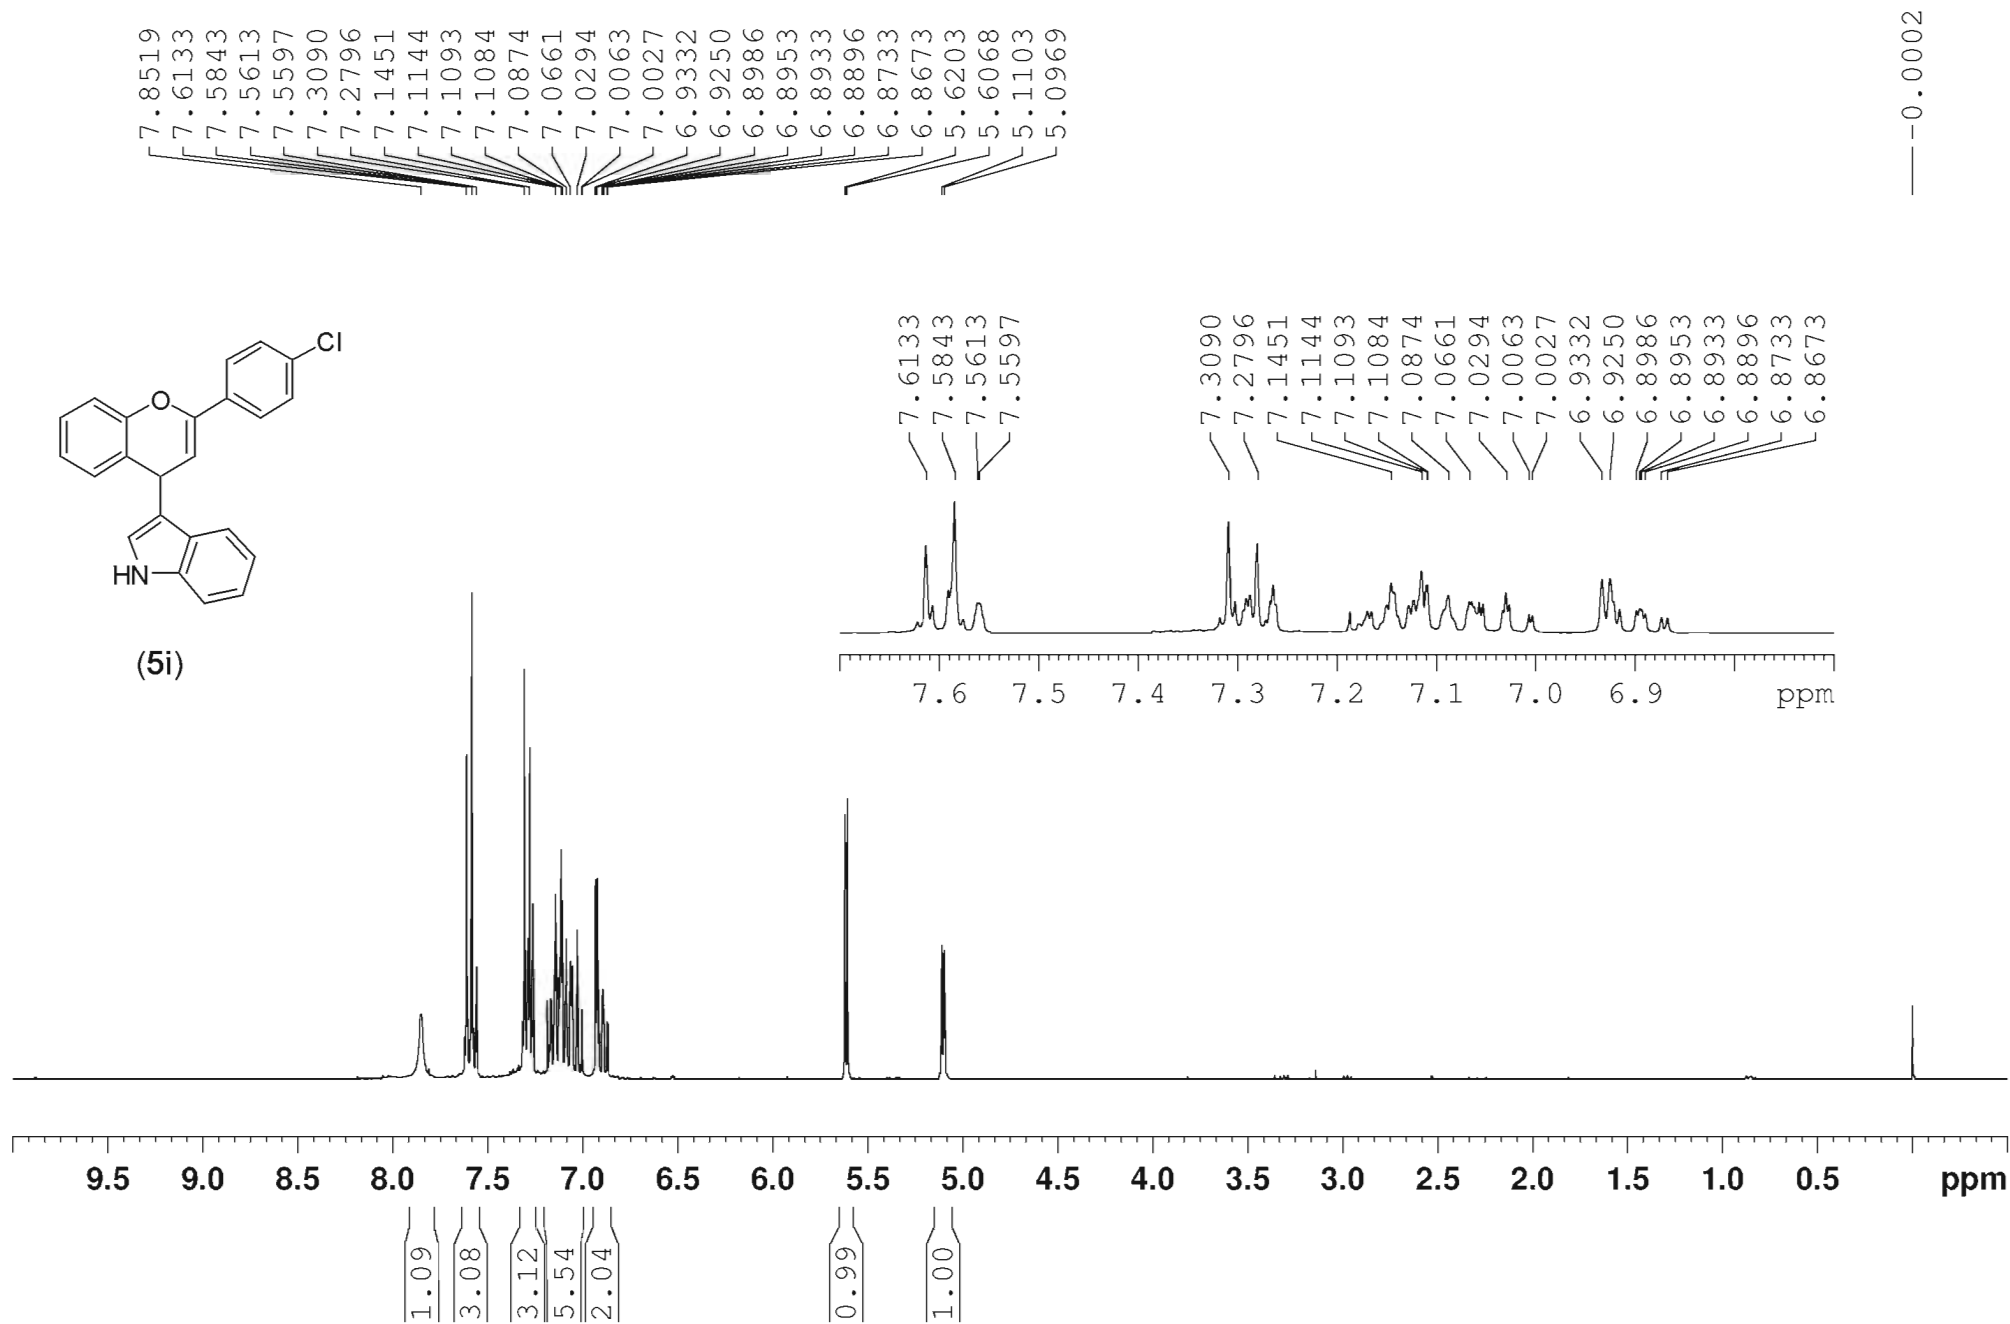

$^{13}\text{C}$  NMR (75MHz,  $\text{CDCl}_3$ )

150.8683  
146.7054  
136.5410  
134.0328  
132.7369  
129.4671  
128.4006  
127.5699  
126.1742  
125.9133  
123.5003  
123.1077  
122.1285  
122.0387  
121.1840  
119.6041  
119.2069  
116.3932  
111.2468  
101.4113

77.4141  
76.9906  
76.5682

32.0047

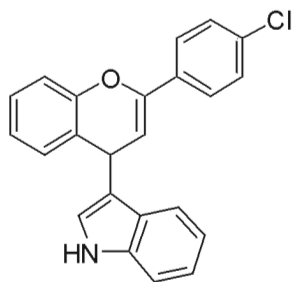

(5i)

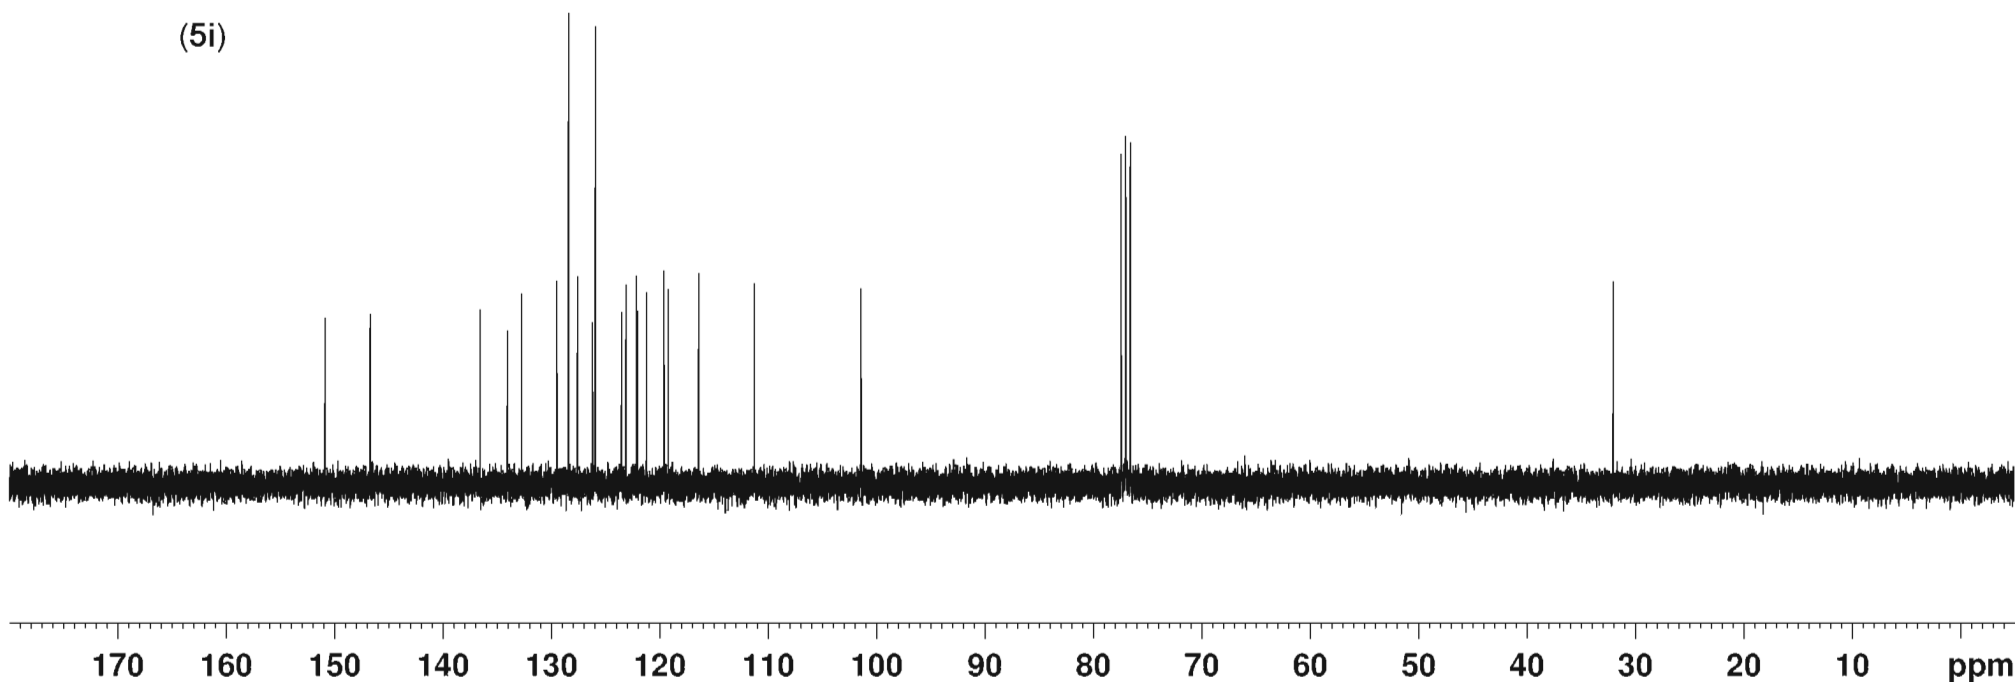

$^1\text{H}$  NMR (300MHz,  $\text{CDCl}_3$ )

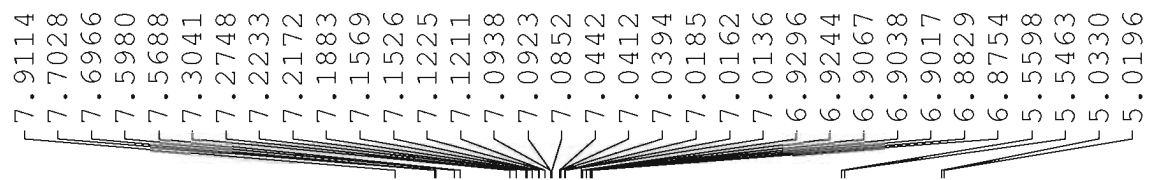

— 1.2524

— -0.0001

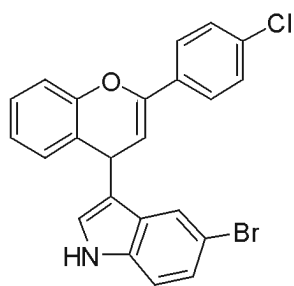

(5j)

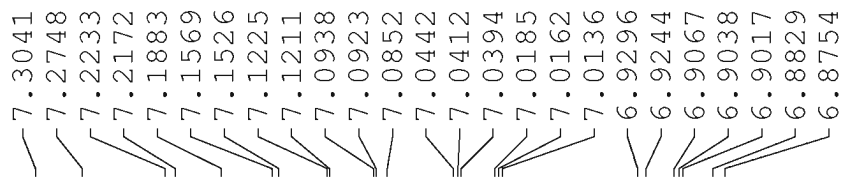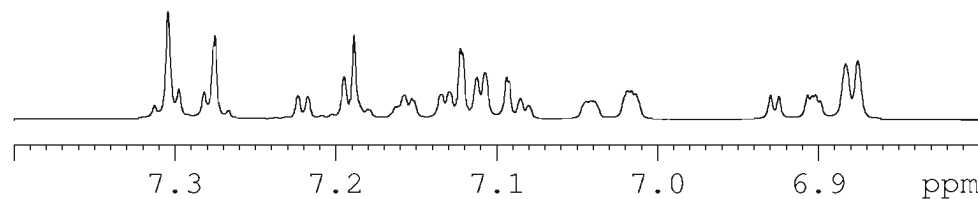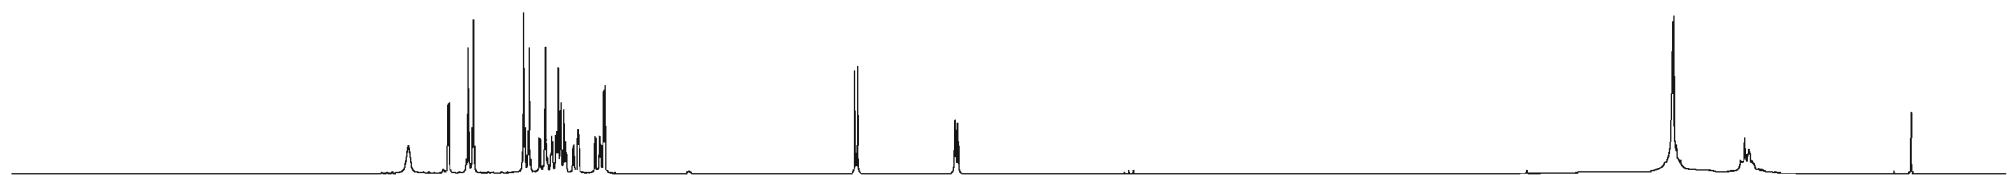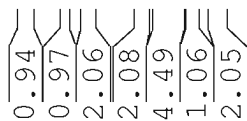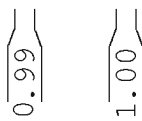

$^{13}\text{C}$  NMR (75MHz,  $\text{CDCl}_3$ )

150.8410  
146.9827  
135.0855  
134.1630  
132.6034  
129.2740  
128.4388  
127.9057  
127.7629  
125.9354  
125.0355  
123.5992  
123.4676  
122.7407  
121.6150  
121.0389  
116.5553  
112.9320  
112.7217  
100.9449

77.4242  
77.0007  
76.5764

31.7502

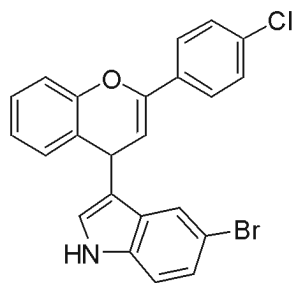

(5j)

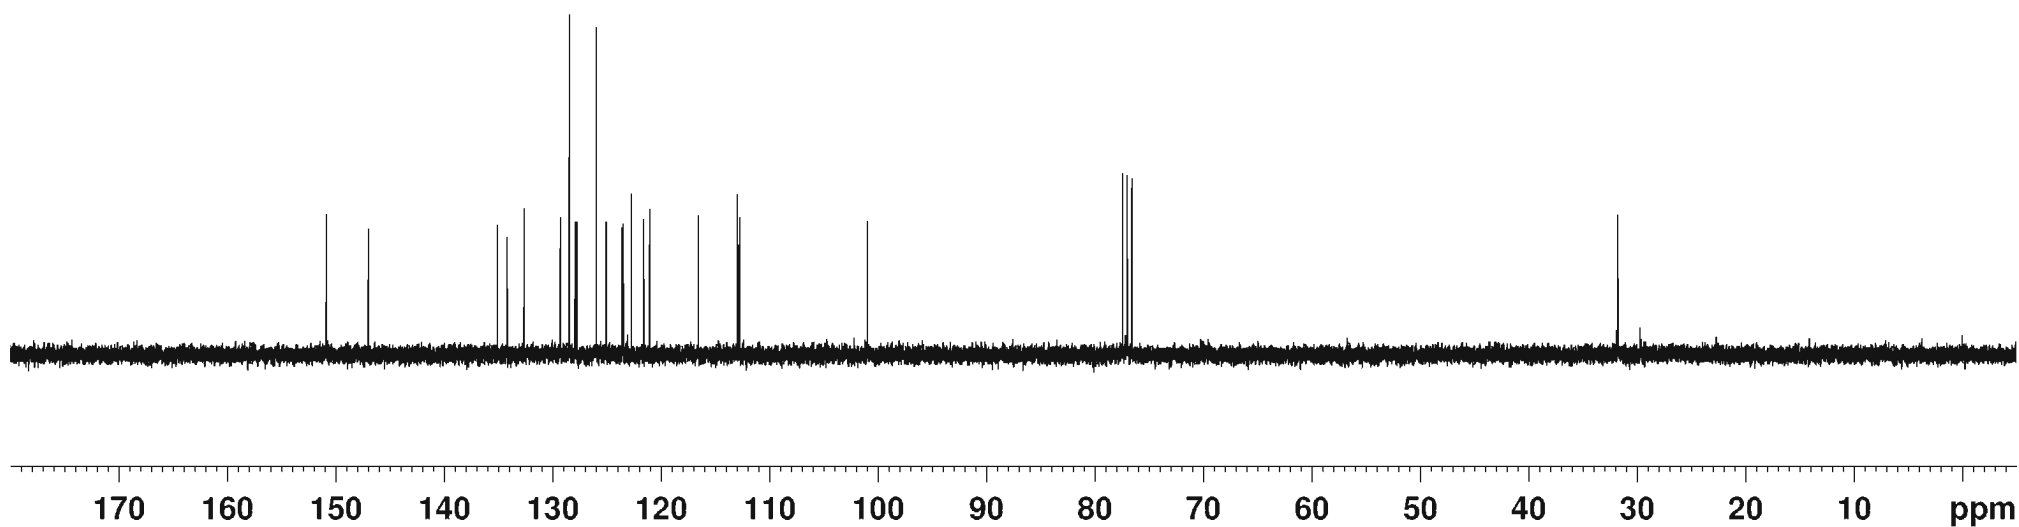



$^1\text{H}$  NMR (300MHz,  $\text{CDCl}_3$ )

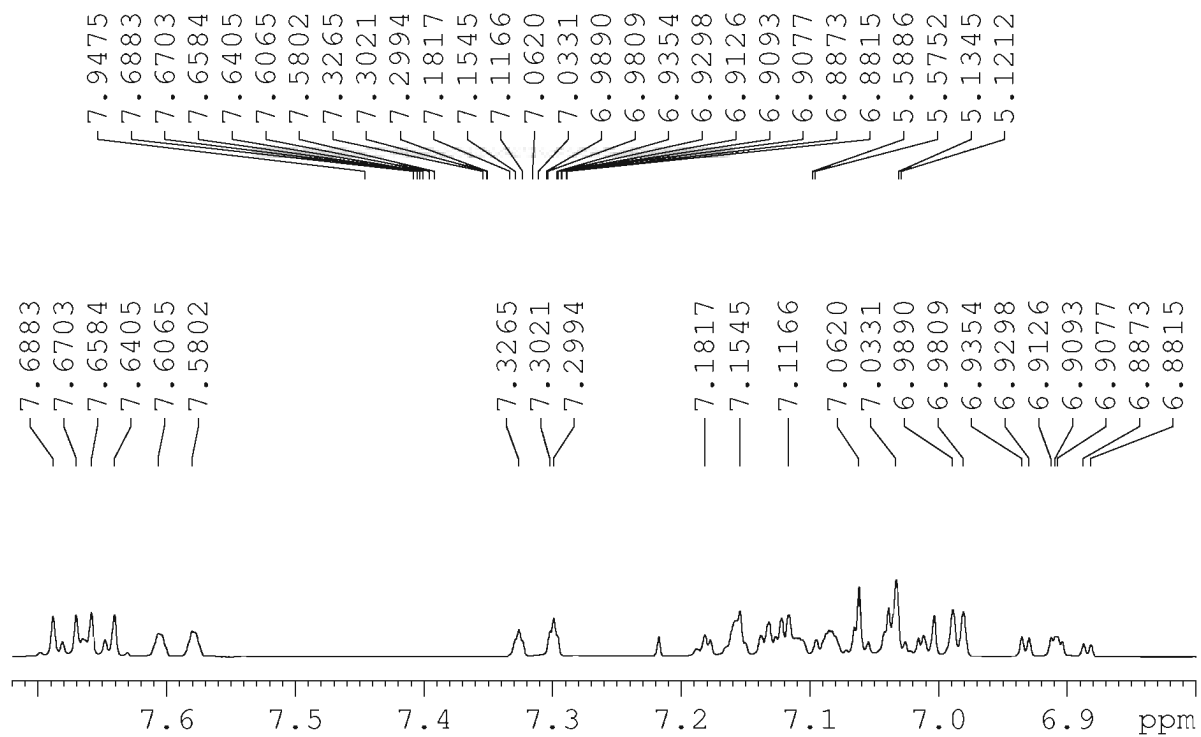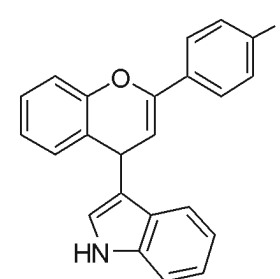

(5k)

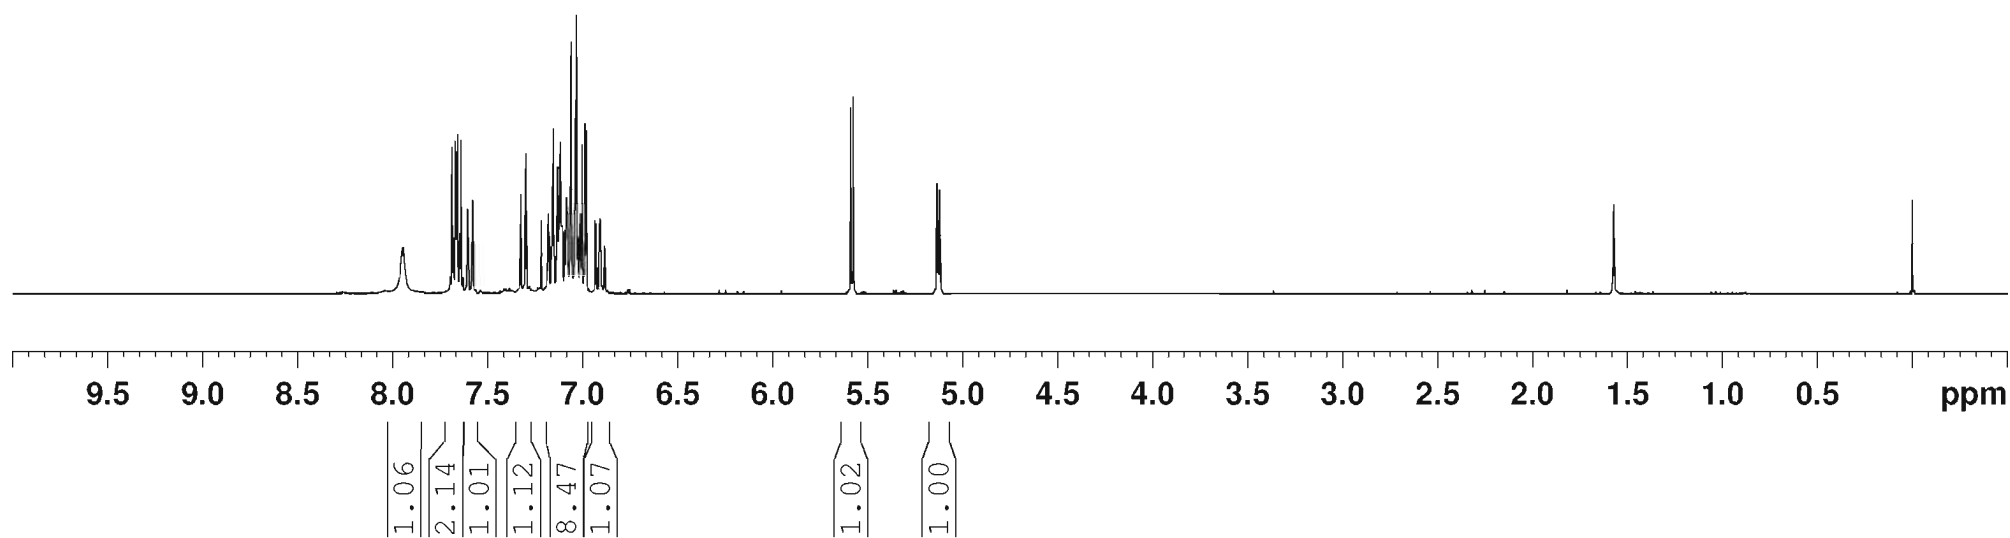

$^{13}\text{C}$  NMR (75 MHz,  $\text{CDCl}_3$ )

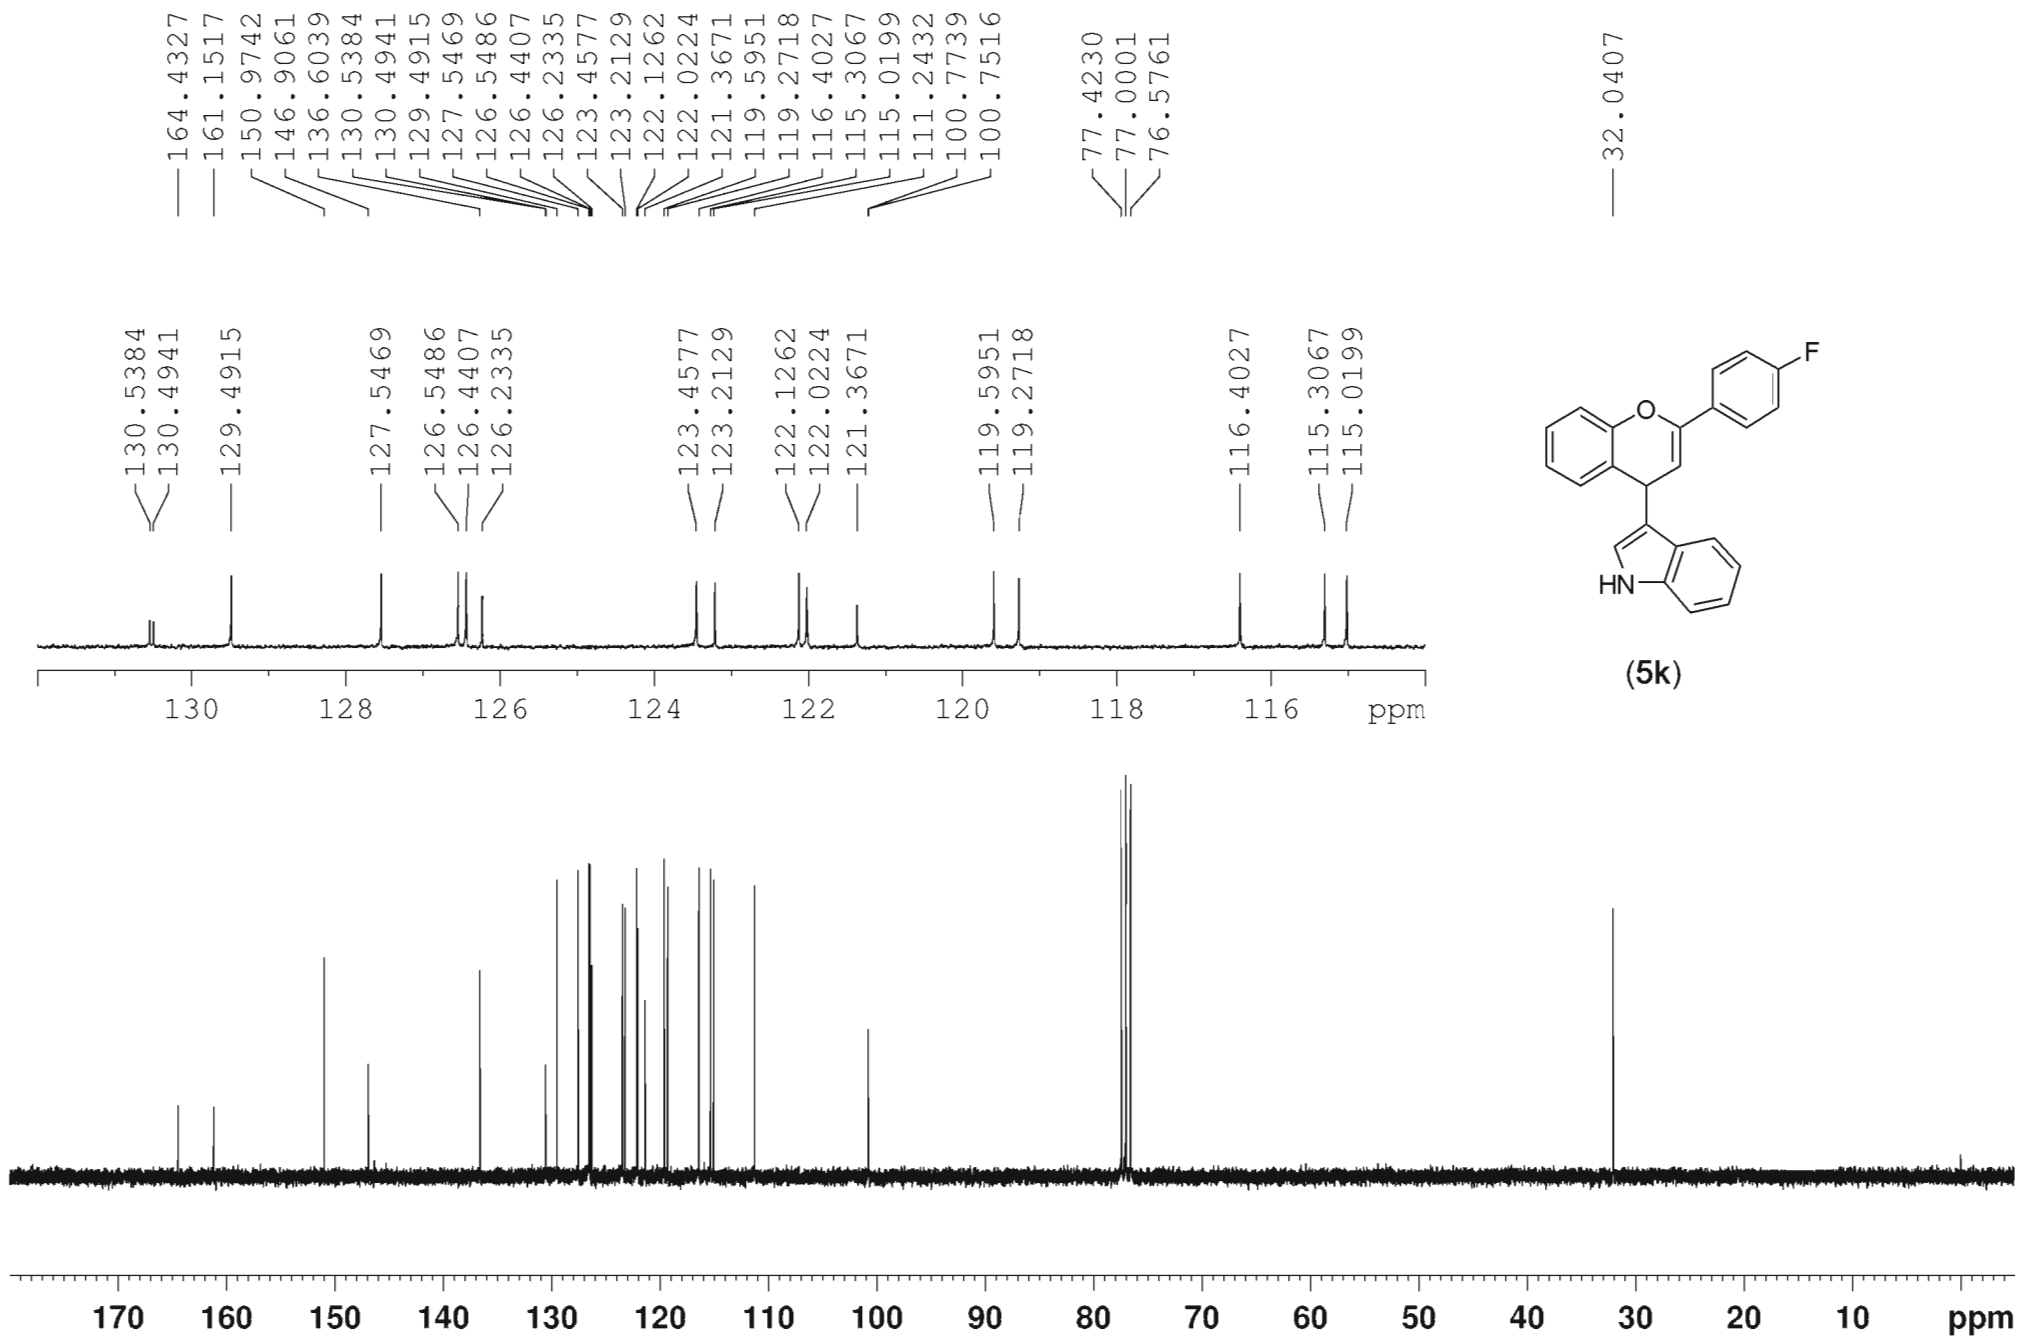

$^1\text{H}$  NMR (300MHz,  $\text{CDCl}_3$ )

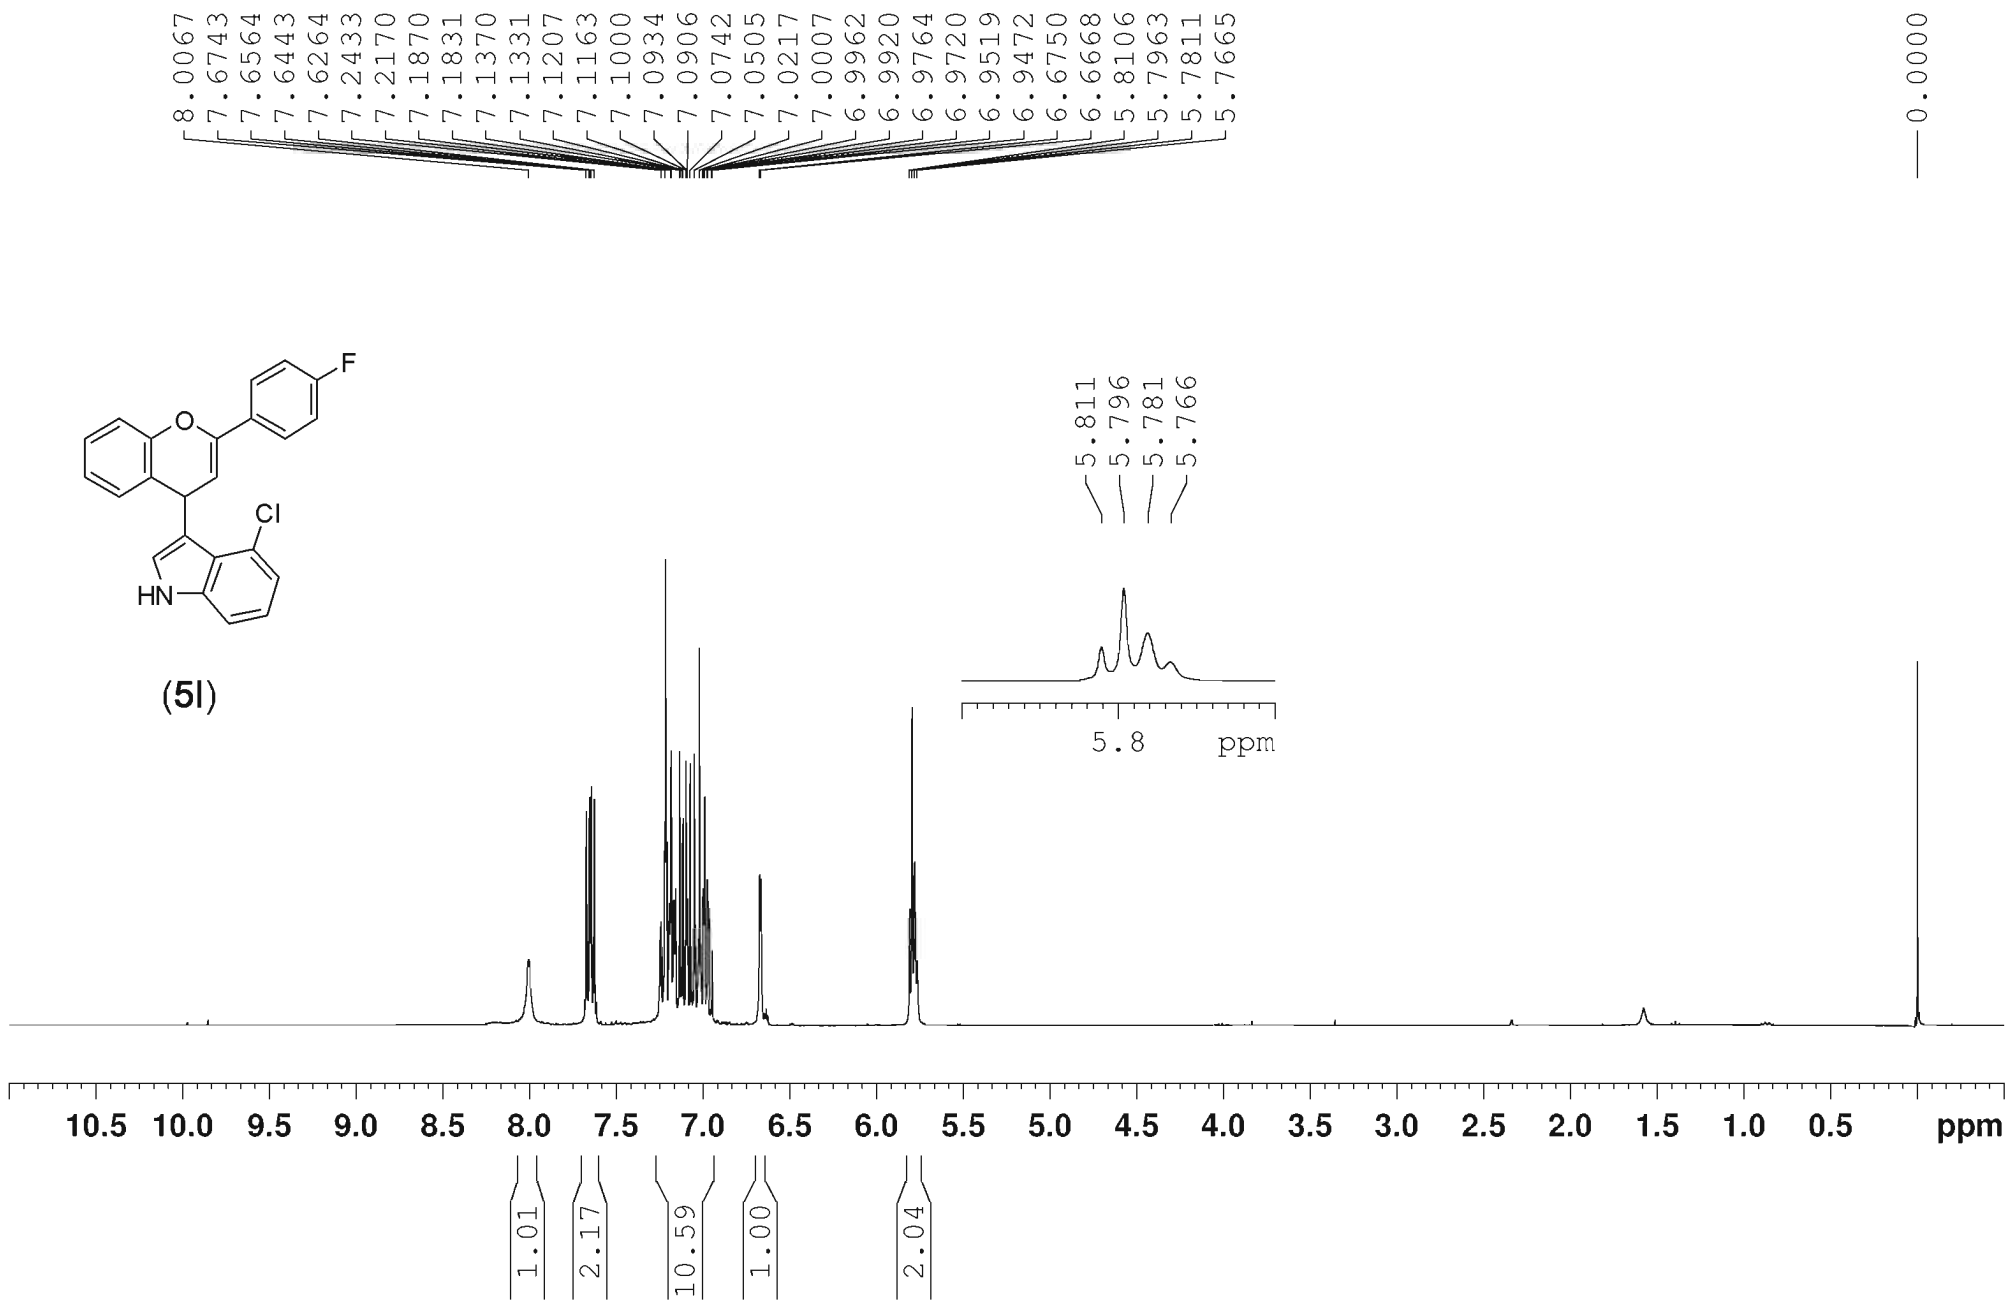

$^{13}\text{C}$  NMR (75MHz,  $\text{CDCl}_3$ )

164.3846  
161.1050  
151.2231  
146.1451  
137.5308  
130.6162  
130.5737  
130.0032  
127.5075  
126.4680  
126.3601  
125.9220  
125.0060  
123.8702  
123.4029  
123.0455  
122.5765  
120.9879  
119.5353  
116.4136  
115.2799  
114.9931  
110.1573  
101.8580  
101.8354  
77.4227  
76.9997  
76.5766

— 31.2555

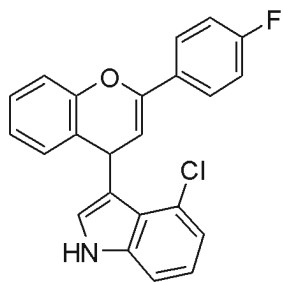

(5I)

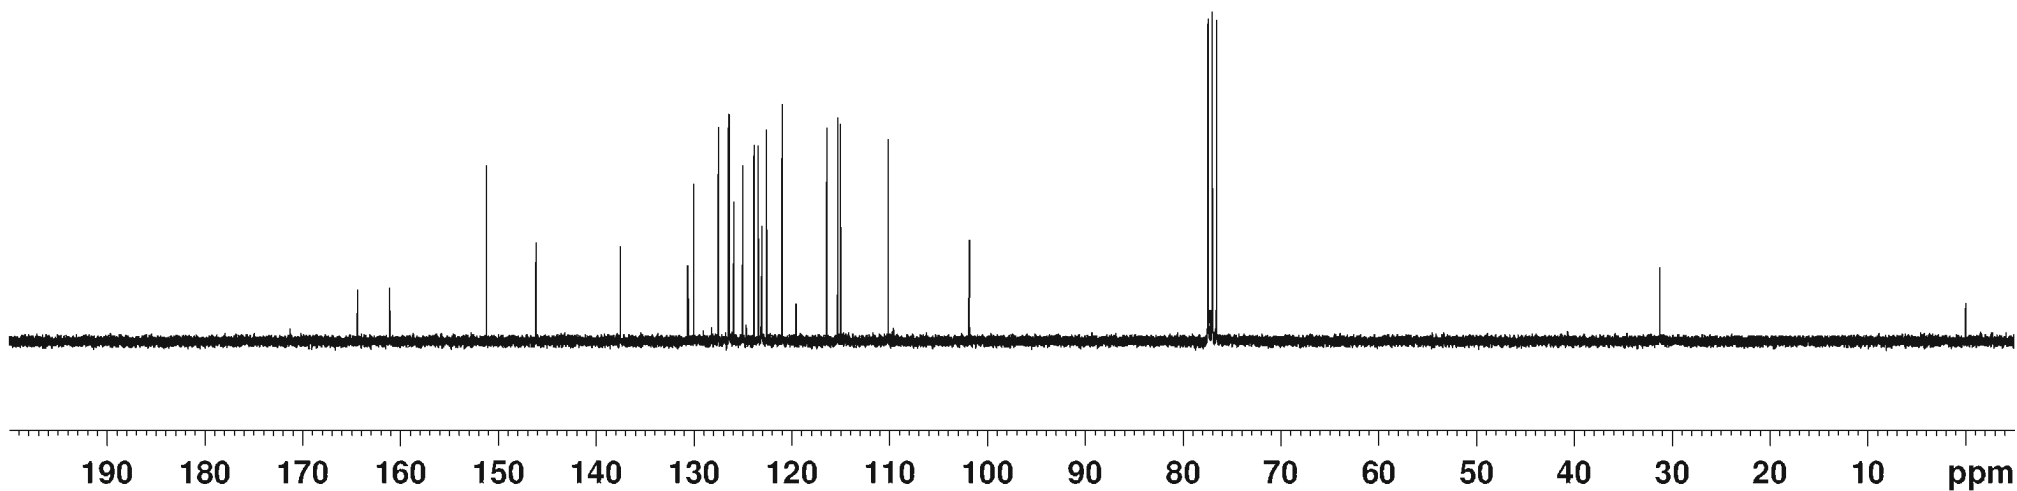

<sup>1</sup>H NMR (300MHz, CDCl<sub>3</sub>)

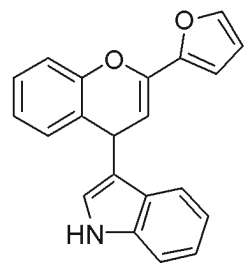

(5m)

7.8937  
7.6042  
7.5778  
7.3423  
7.3389  
7.3167  
7.2896  
7.2152  
7.1746  
7.1547  
7.1512  
7.1473  
7.1419  
7.0603  
7.0455  
7.0426  
7.0223  
7.0189  
6.9702  
6.9621  
6.9247  
6.9204  
6.9013  
6.8972  
6.8760  
6.8709  
6.6535  
6.6425  
6.4358  
6.4298  
6.4247  
6.4186  
5.6898  
5.6762  
5.1245  
5.1110

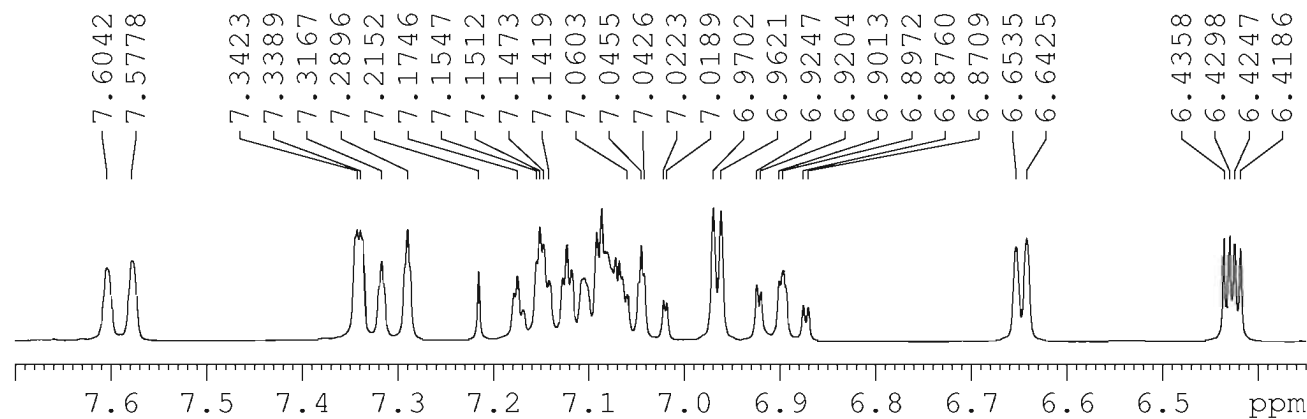

— 0.0000

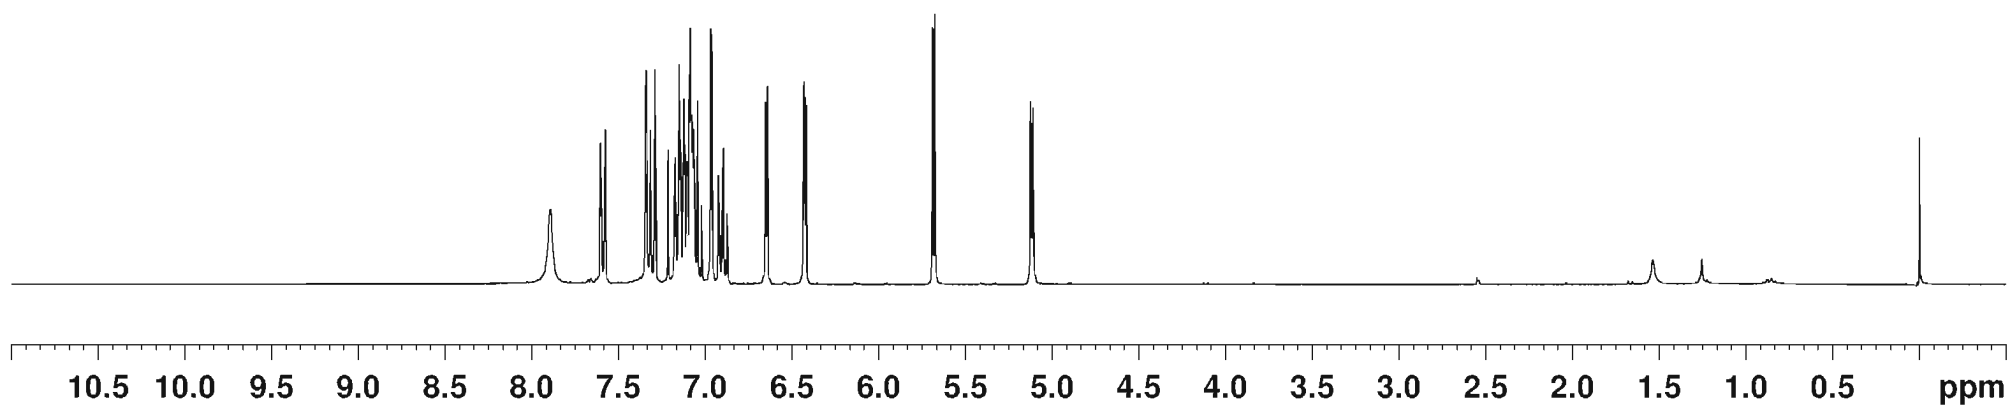

$^{13}\text{C}$  NMR (75MHz,  $\text{CDCl}_3$ )

150.6757  
148.7455  
142.2269  
140.9936  
136.5708  
129.6208  
127.5418  
126.2474  
123.4548  
123.3323  
122.1199  
122.0961  
121.2498  
119.5752  
119.2777  
116.4130  
111.2085  
111.1317  
106.4053  
99.9746

77.4241  
77.0008  
76.5772

31.3717

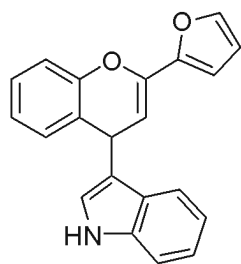

(5m)

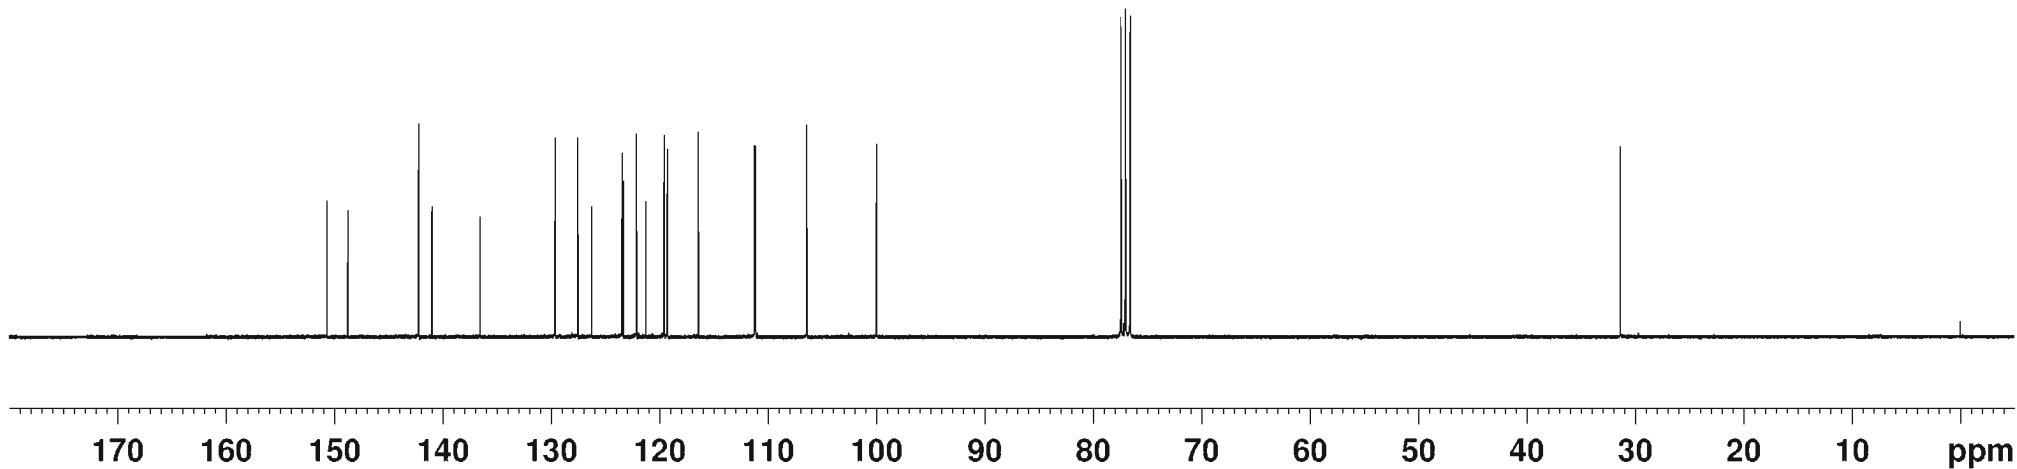

$^1\text{H}$  NMR (300 MHz,  $\text{CDCl}_3$ )

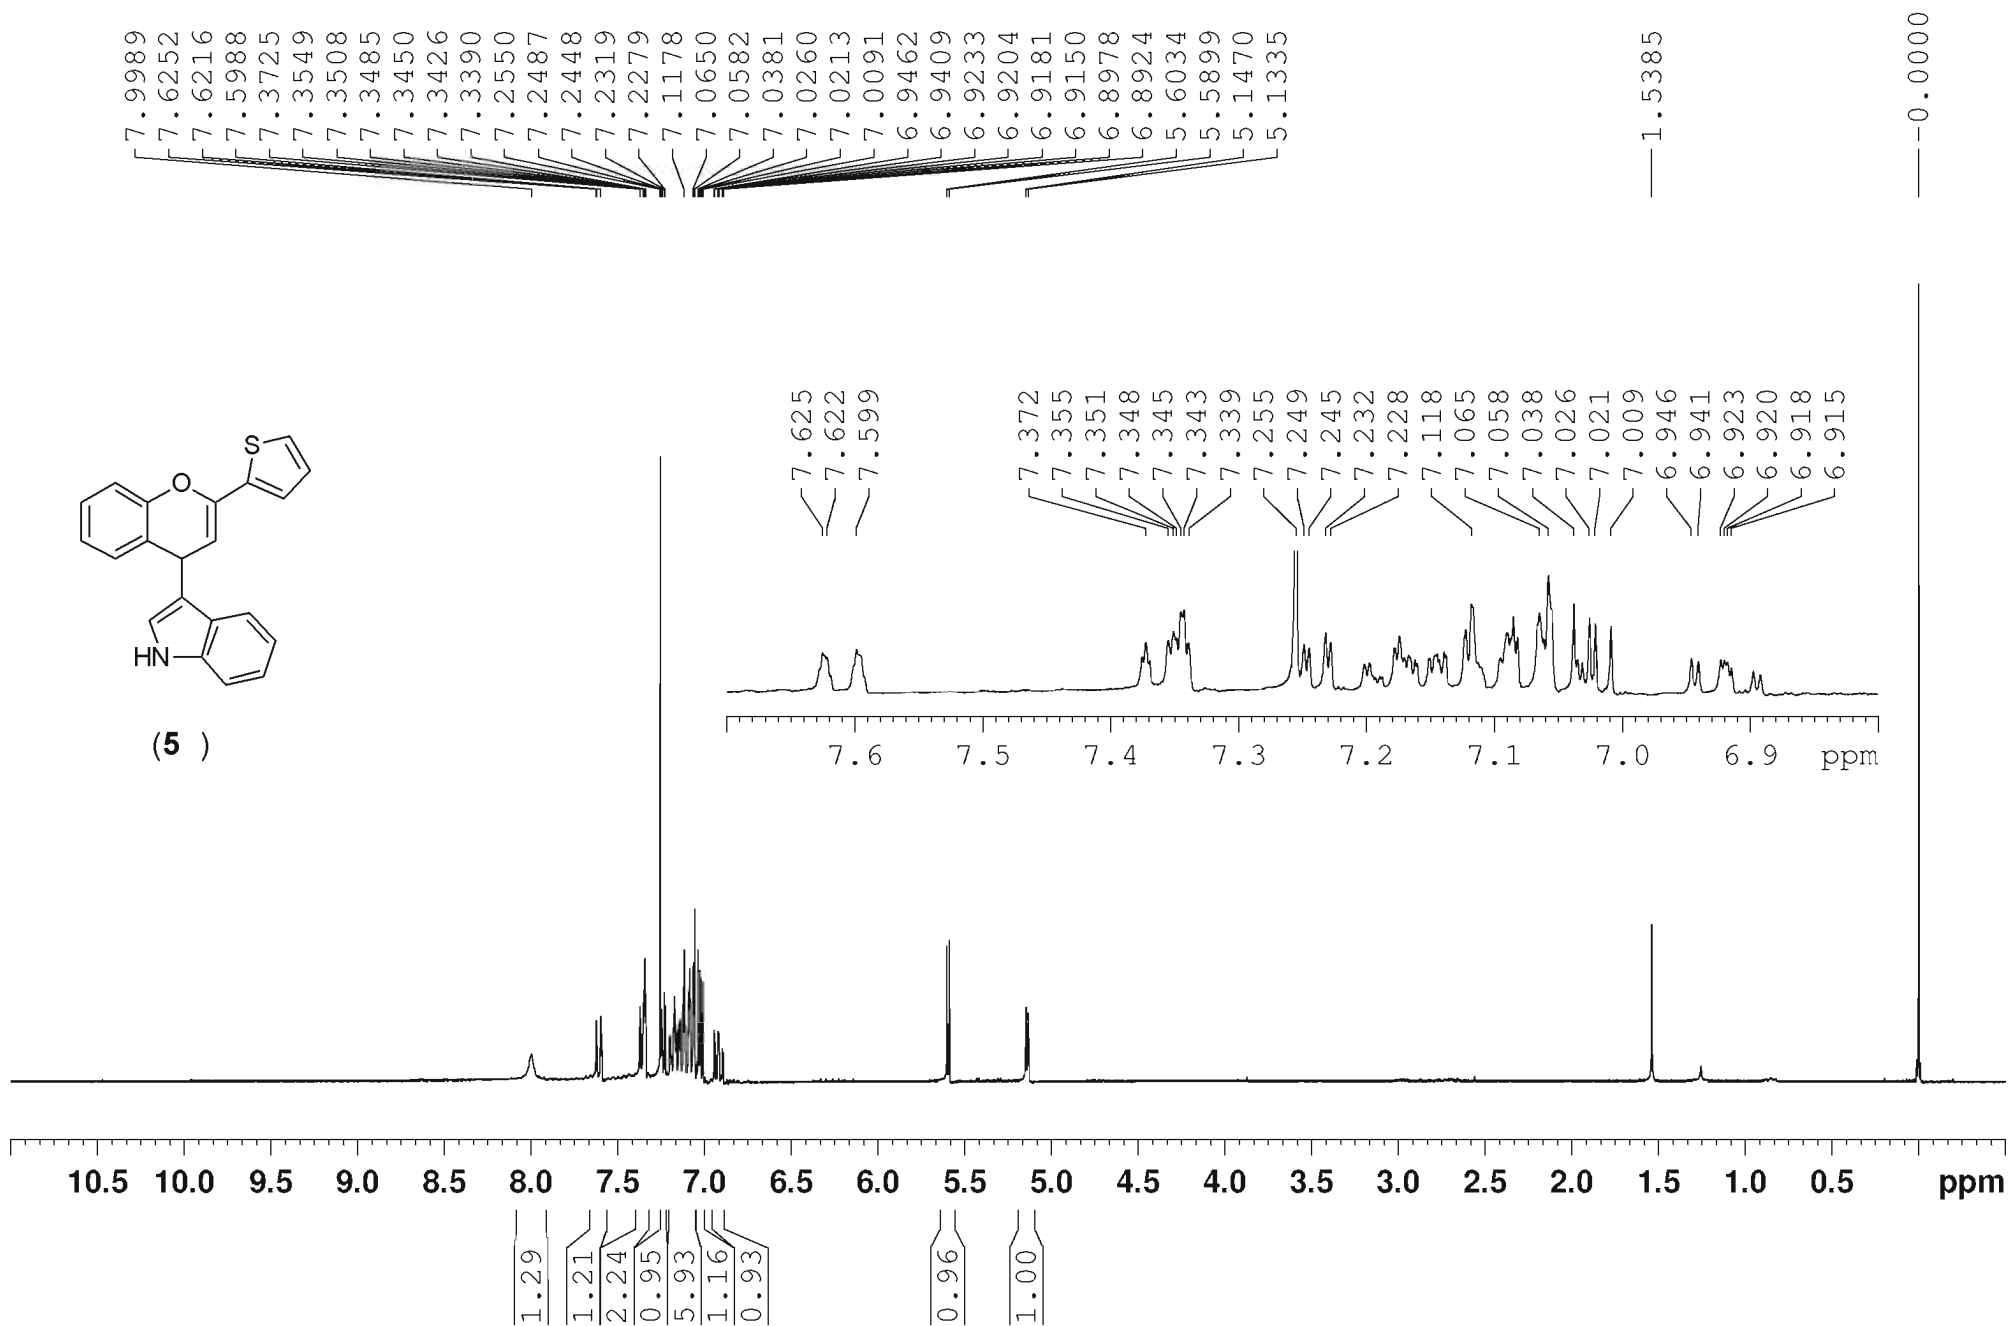

$^{13}\text{C}$  NMR (75 MHz,  $\text{CDCl}_3$ )

150.8420  
143.8621  
138.2001  
136.5860  
129.4782  
127.5381  
127.2487  
126.2712  
124.7423  
123.4829  
123.4553  
123.2182  
122.1547  
122.1118  
121.2635  
119.6464  
119.3500  
116.4470  
111.1886  
100.3547

77.4072  
76.9838  
76.5605

31.9145

0.0297

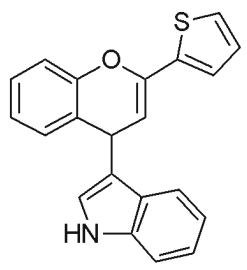

**(5n)**

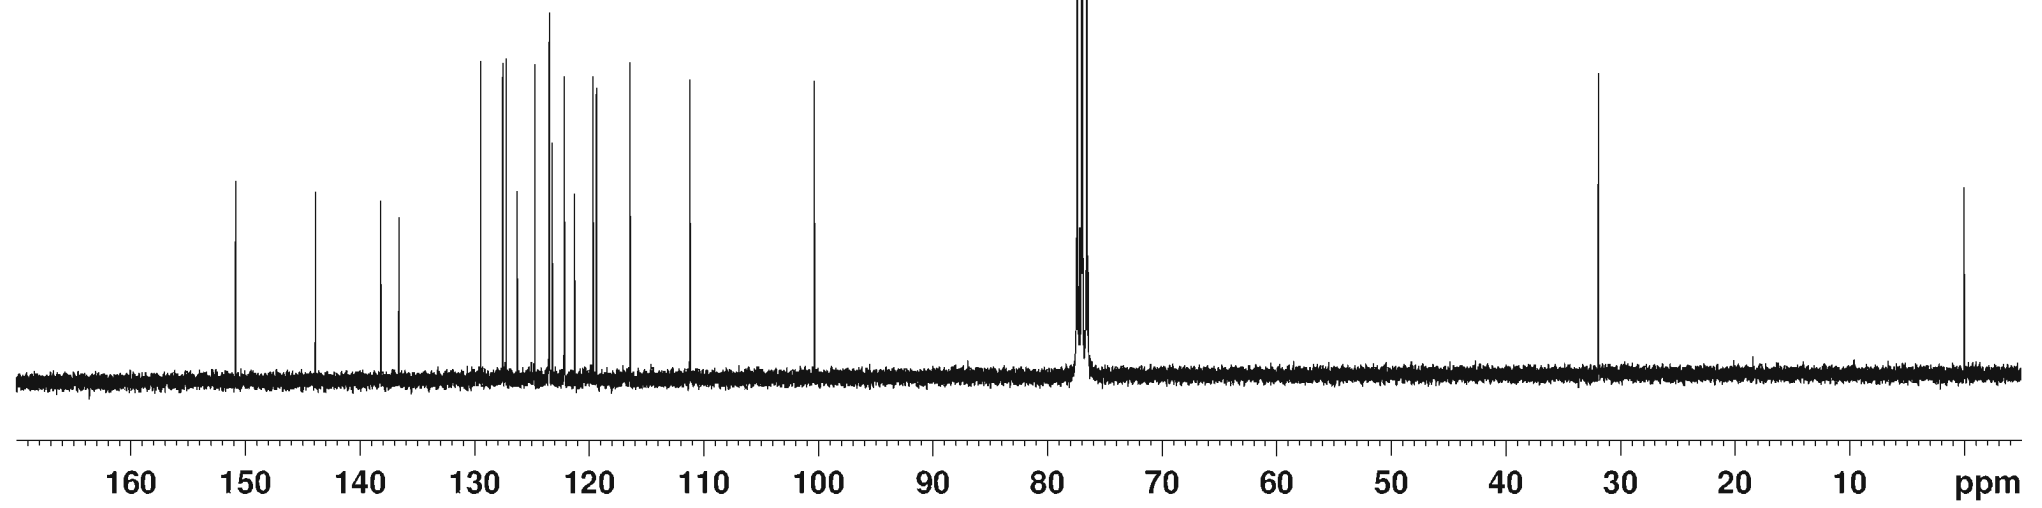



$^1\text{H}$  NMR (300 MHz,  $\text{DMSO-d}_6$ )

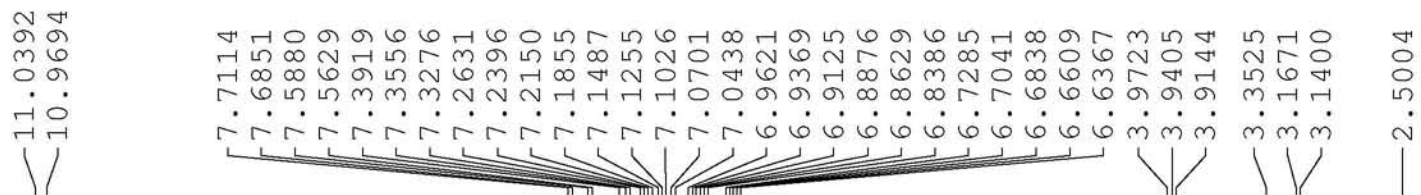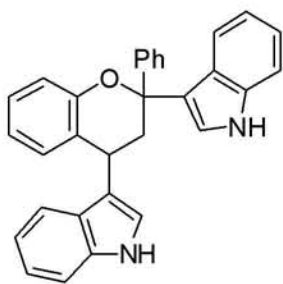

**(5ab)**

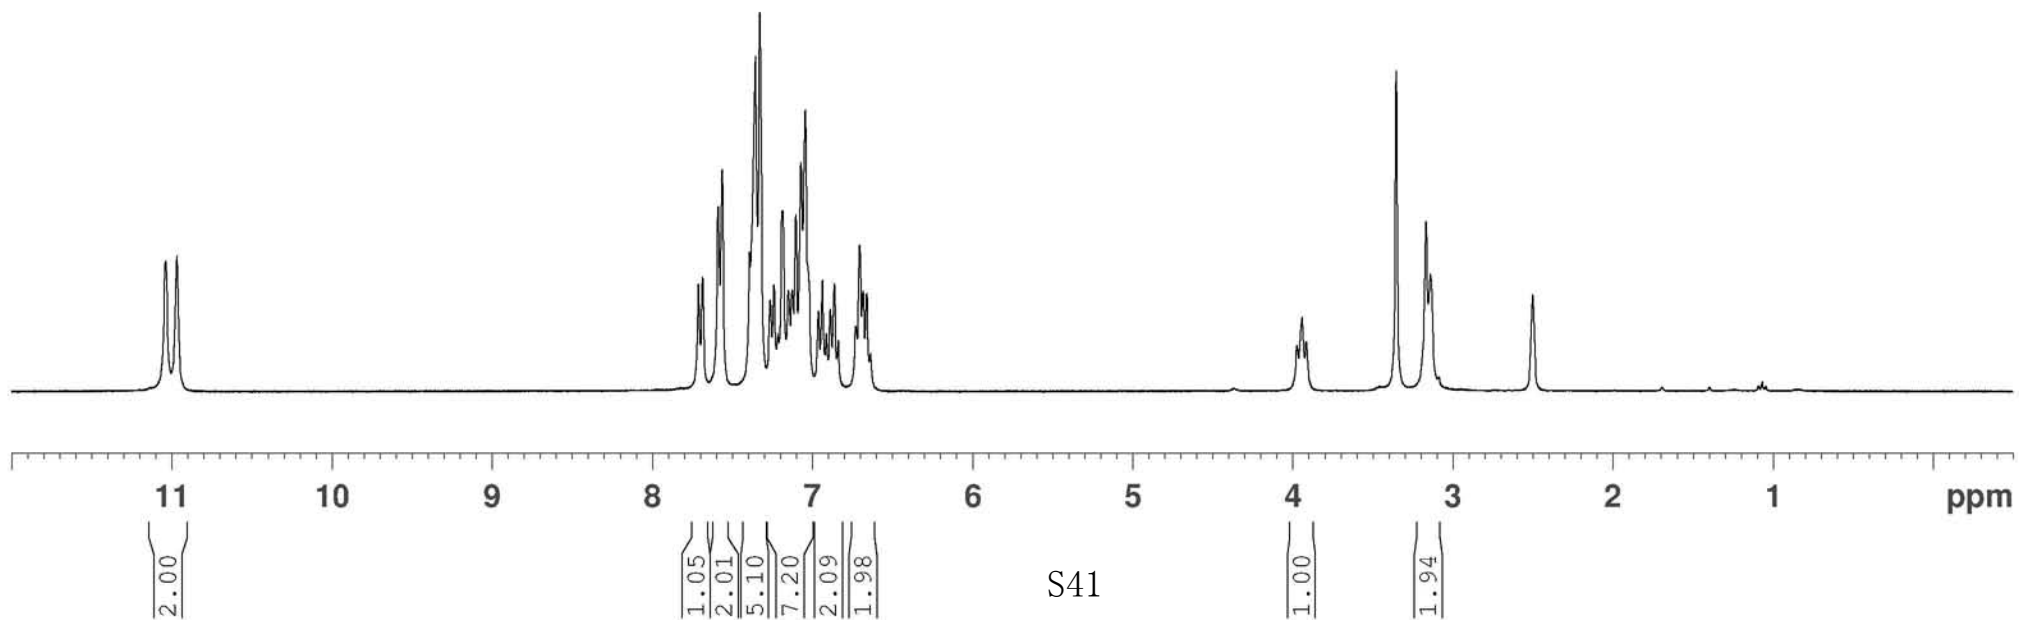

$^{13}\text{C}$  NMR (75 MHz, DMSO- $d_6$ )

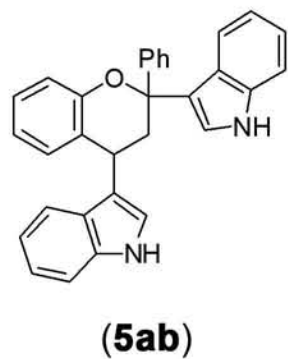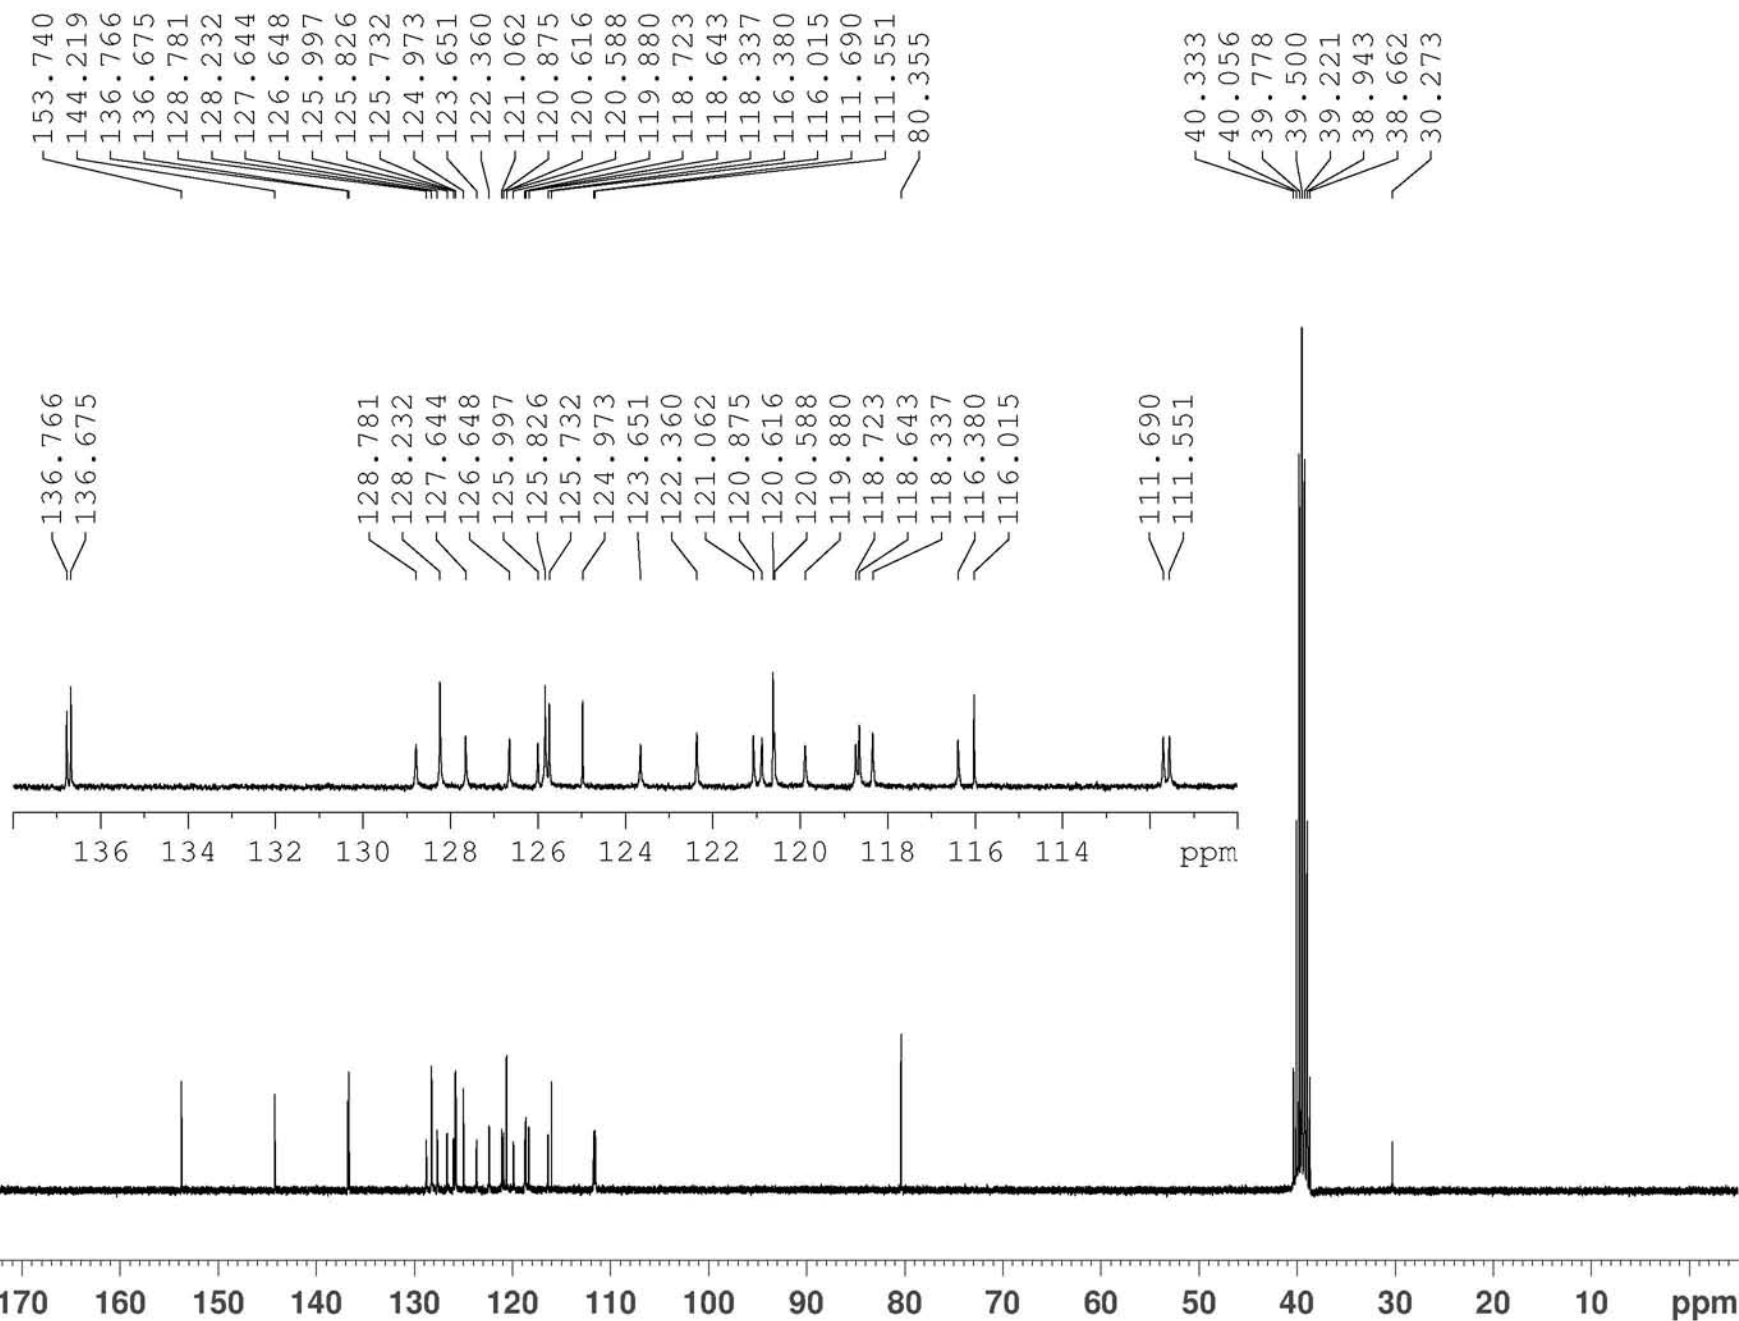

$^1\text{H}$  NMR (300MHz,  $\text{CDCl}_3$ )

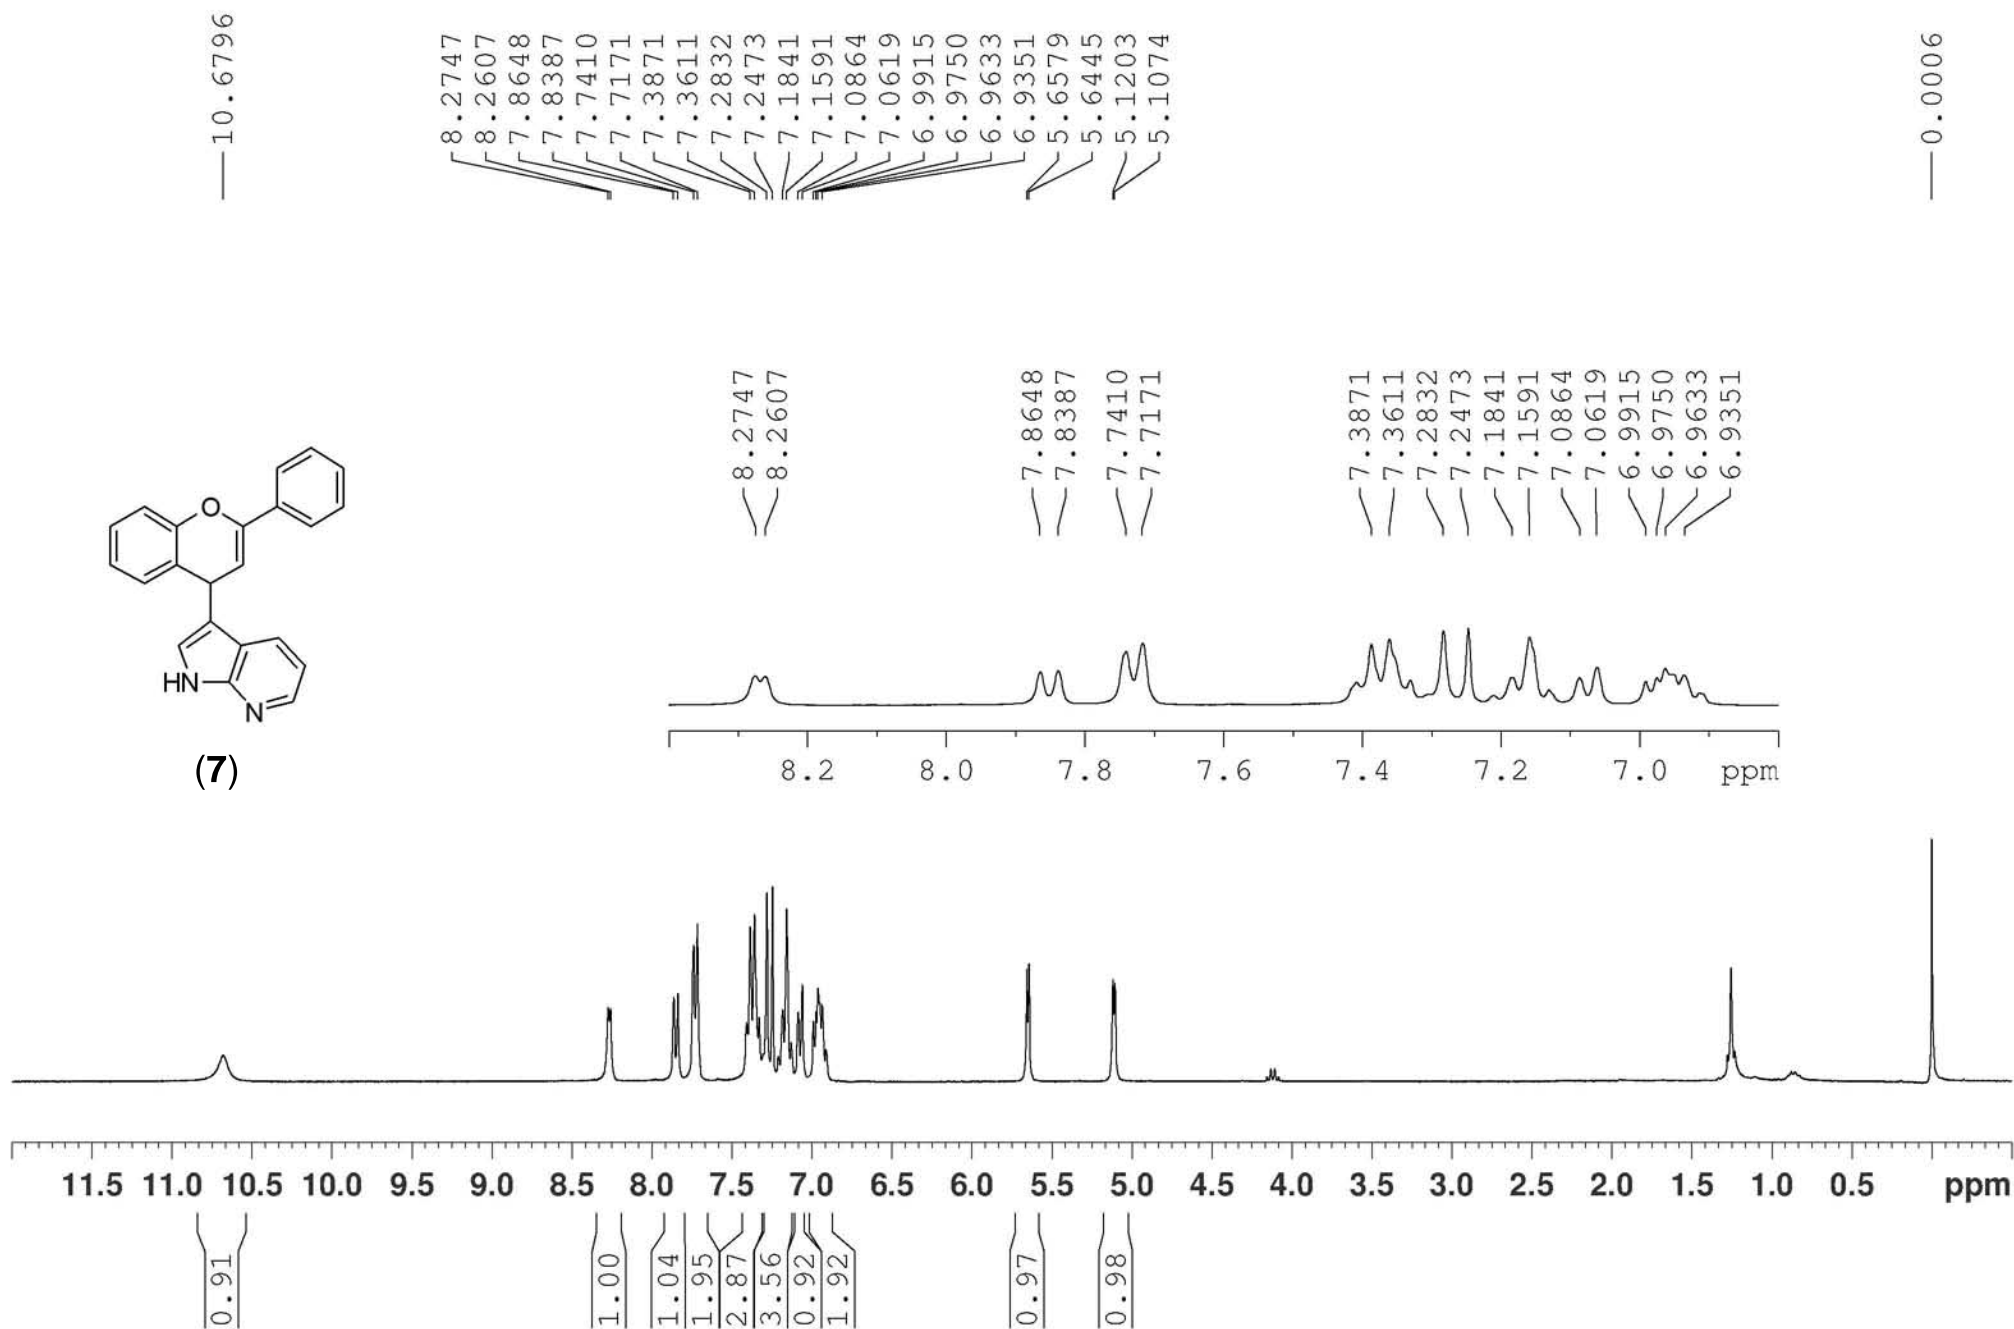

$^{13}\text{C}$  NMR (75MHz,  $\text{CDCl}_3$ )

151.0329  
149.1920  
147.9783  
142.5150  
134.1930  
129.4326  
128.4969  
128.3345  
128.1334  
127.7176  
124.7197  
123.4785  
122.8517  
122.2762  
119.6143  
119.1315  
116.5952  
115.6119  
100.5830  
  
77.4243  
77.0005  
76.5769  
  
32.5830

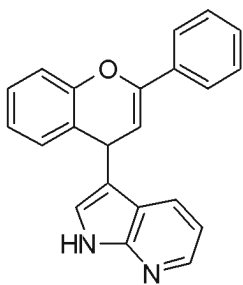

(7)

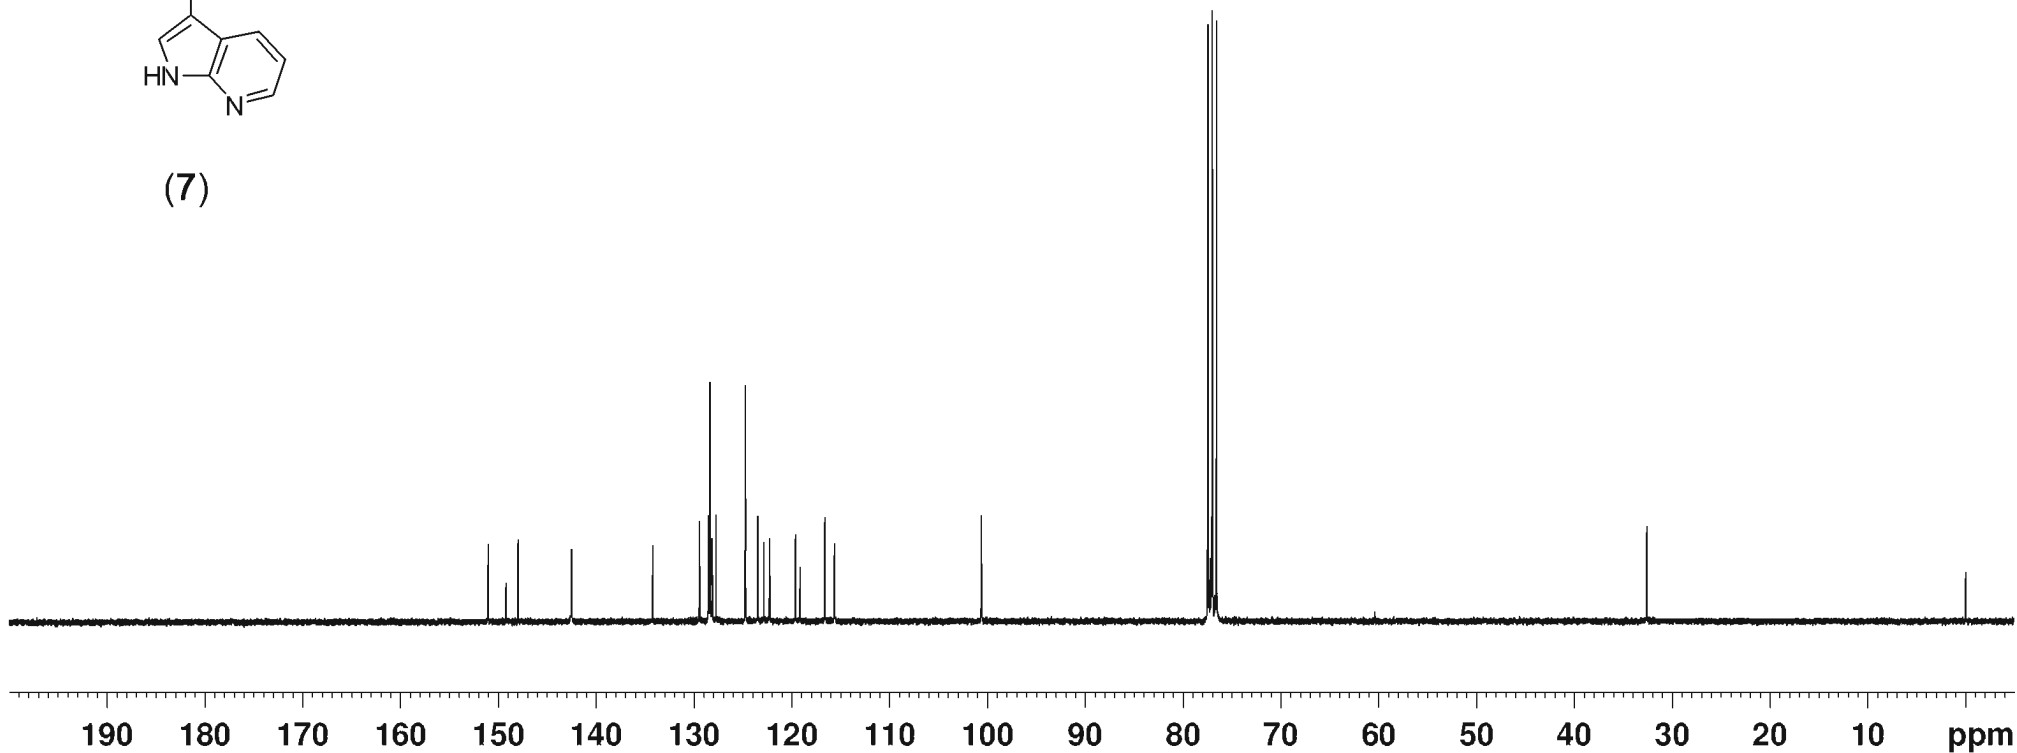

$^1\text{H}$  NMR (300MHz,  $\text{CDCl}_3$ )

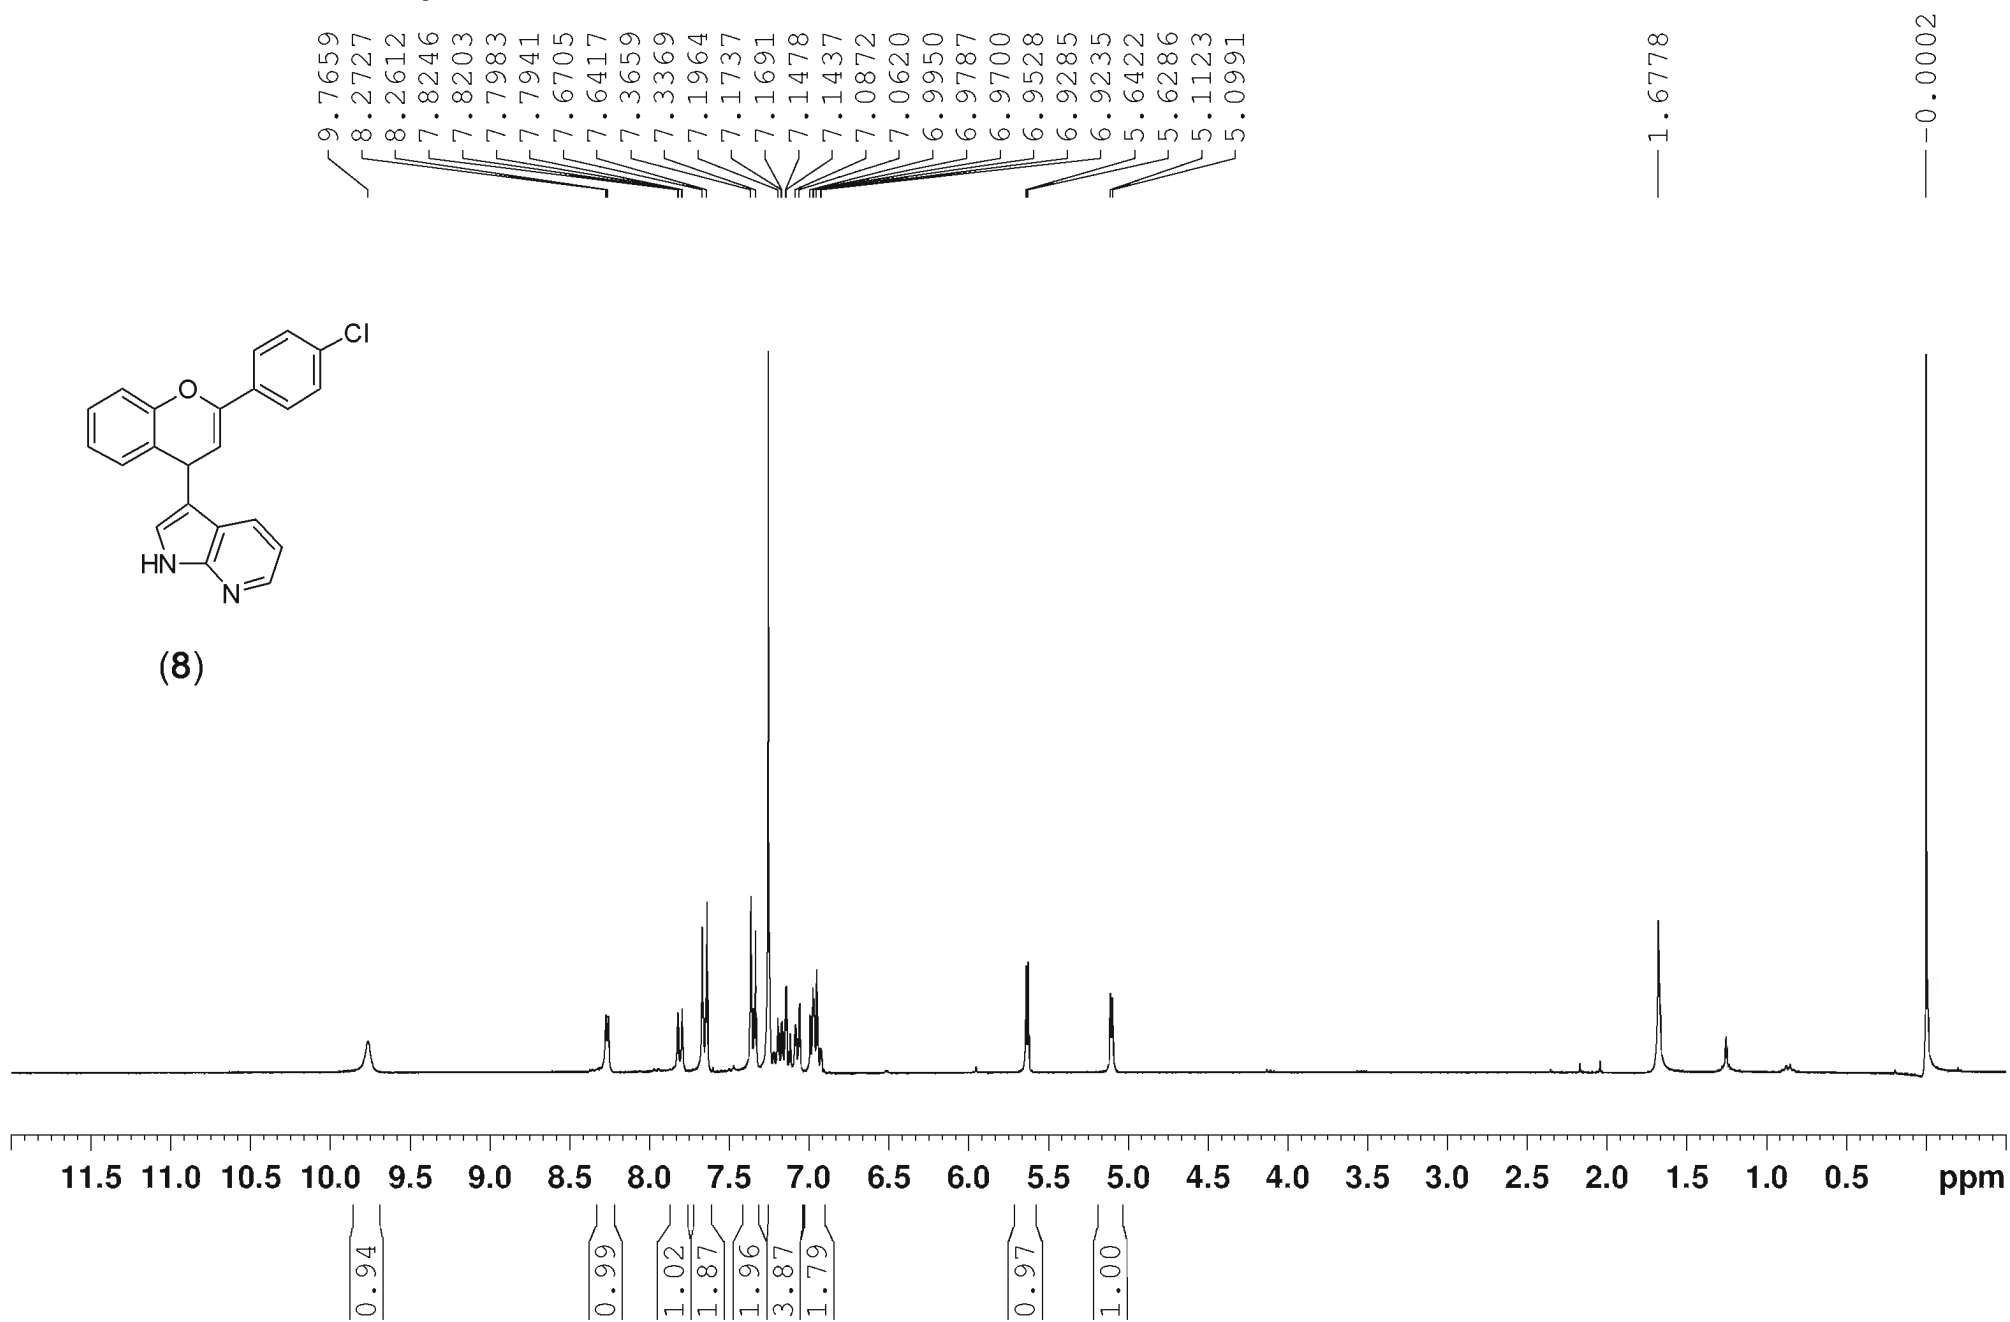

$^{13}\text{C}$  NMR (75MHz,  $\text{CDCl}_3$ )

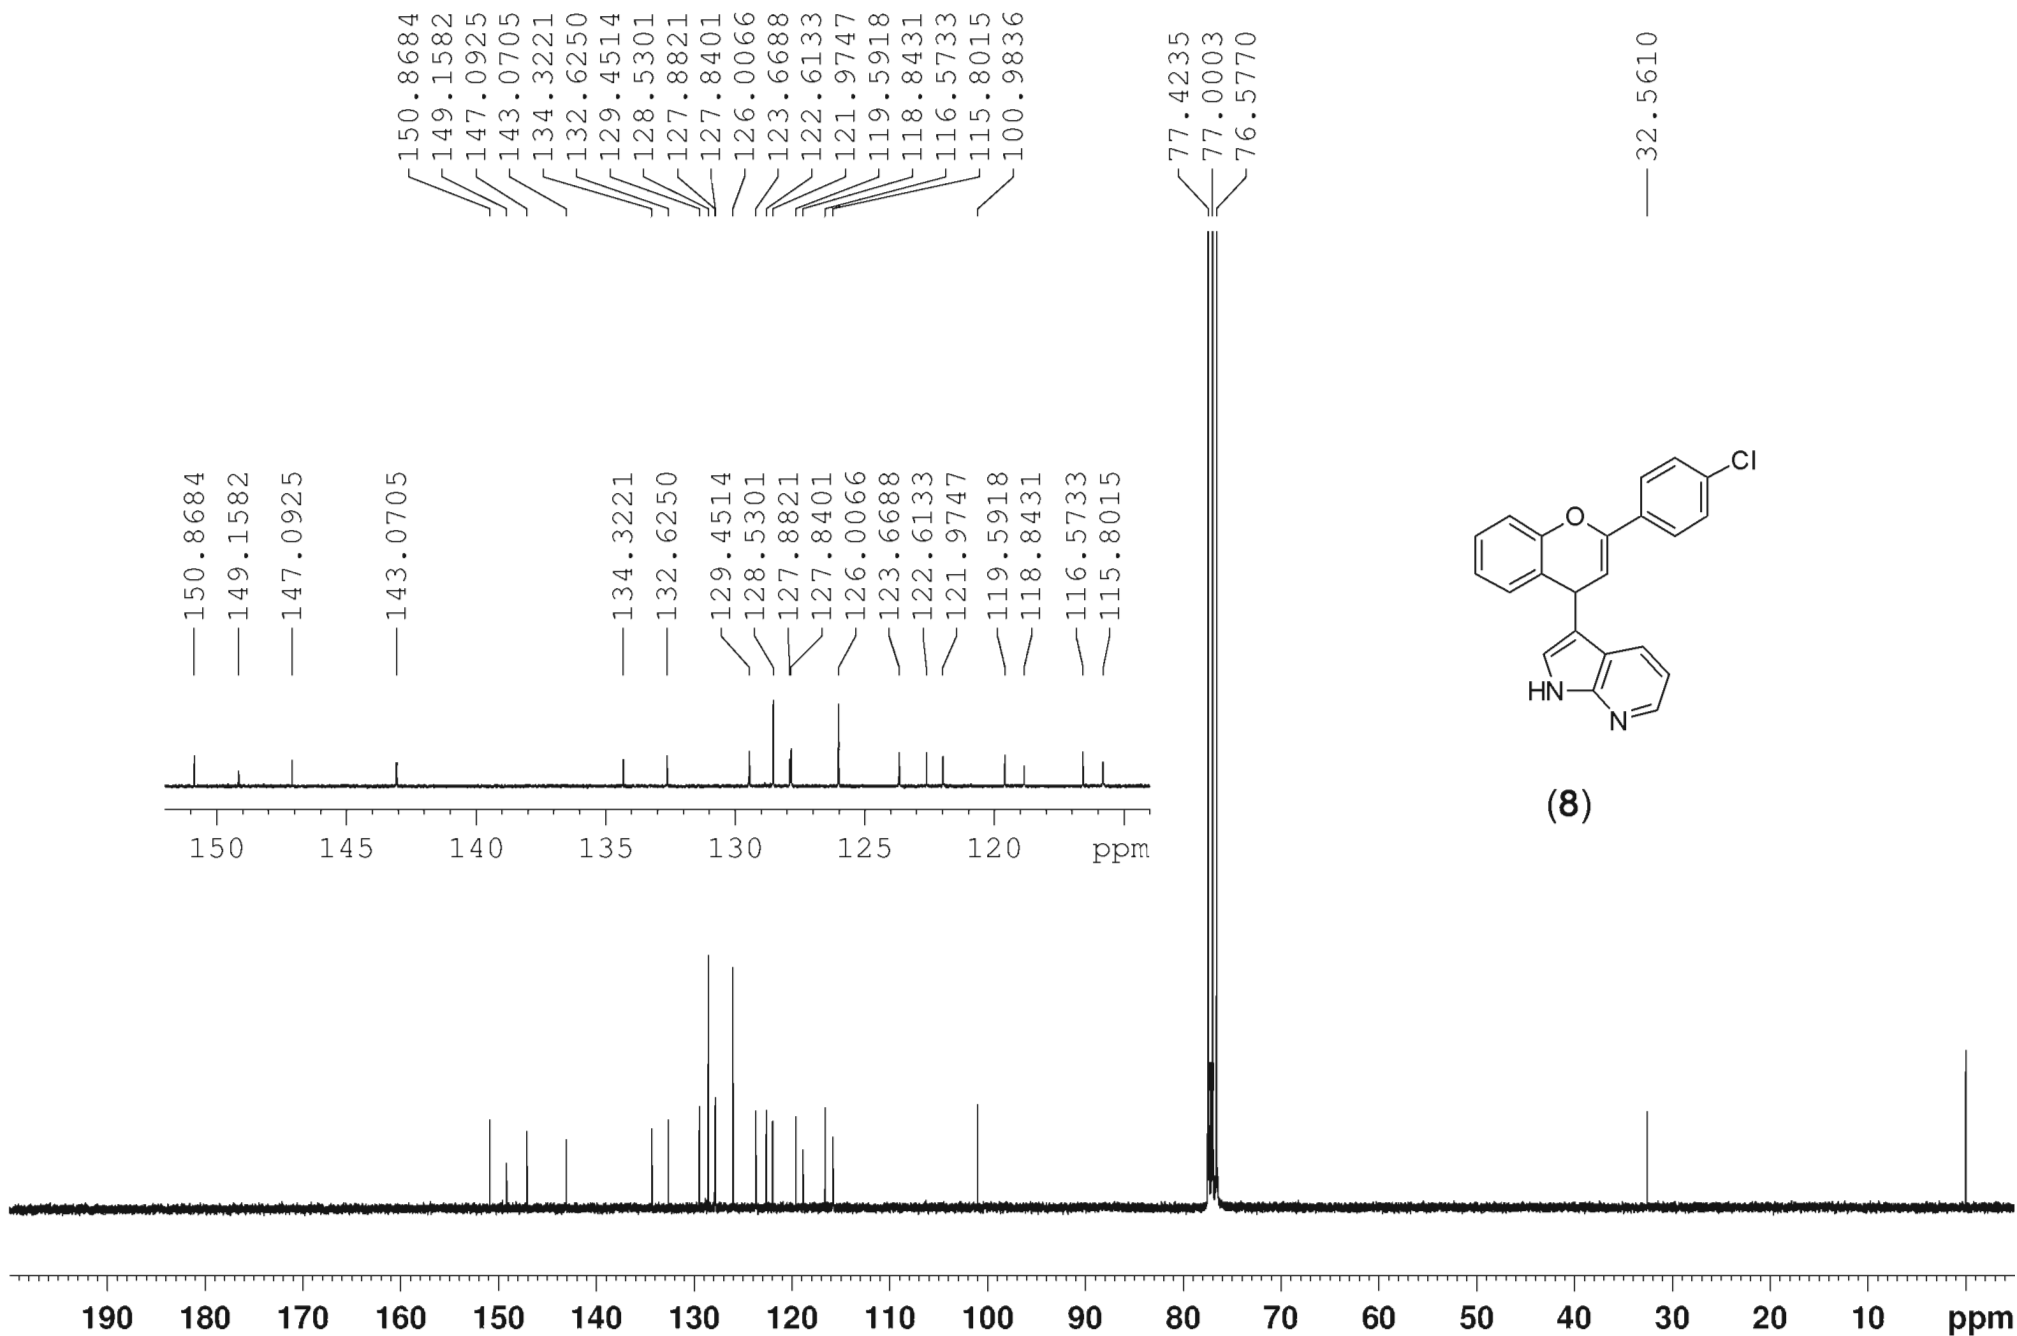

$^1\text{H}$  NMR (300MHz,  $\text{CDCl}_3$ )

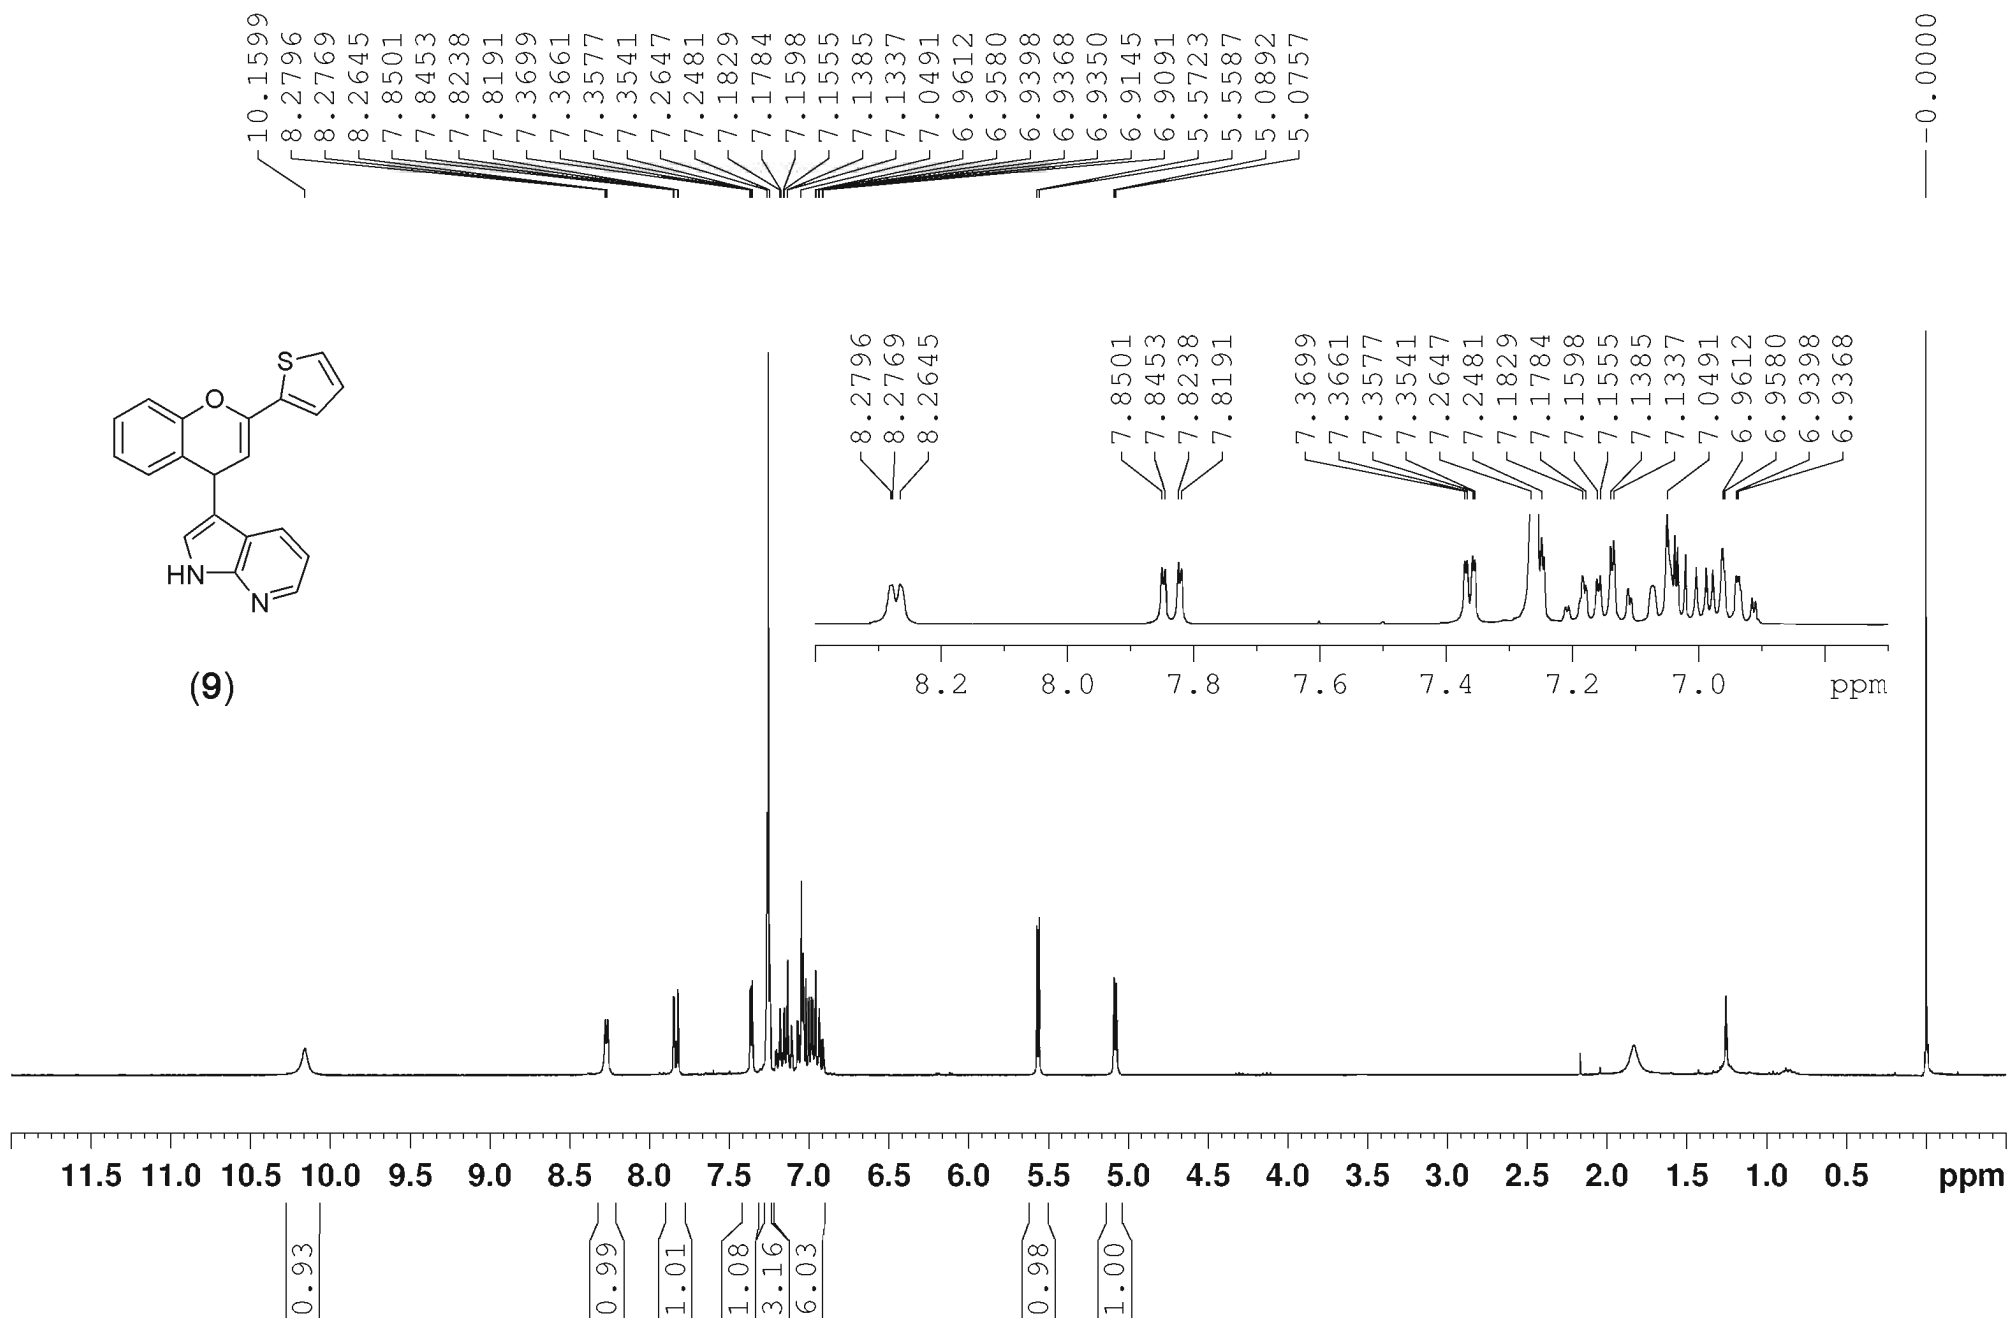

$^{13}\text{C}$  NMR (75MHz,  $\text{CDCl}_3$ )

150.7895  
149.1636  
144.1166  
142.8168  
137.9716  
129.4480  
128.0276  
127.7759  
127.3298  
124.9603  
123.6537  
123.6212  
122.7168  
122.1805  
119.4194  
118.9781  
116.5831  
115.7378  
99.9007

77.4230  
76.9998  
76.5765

32.4163

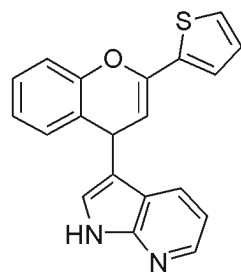

(9)

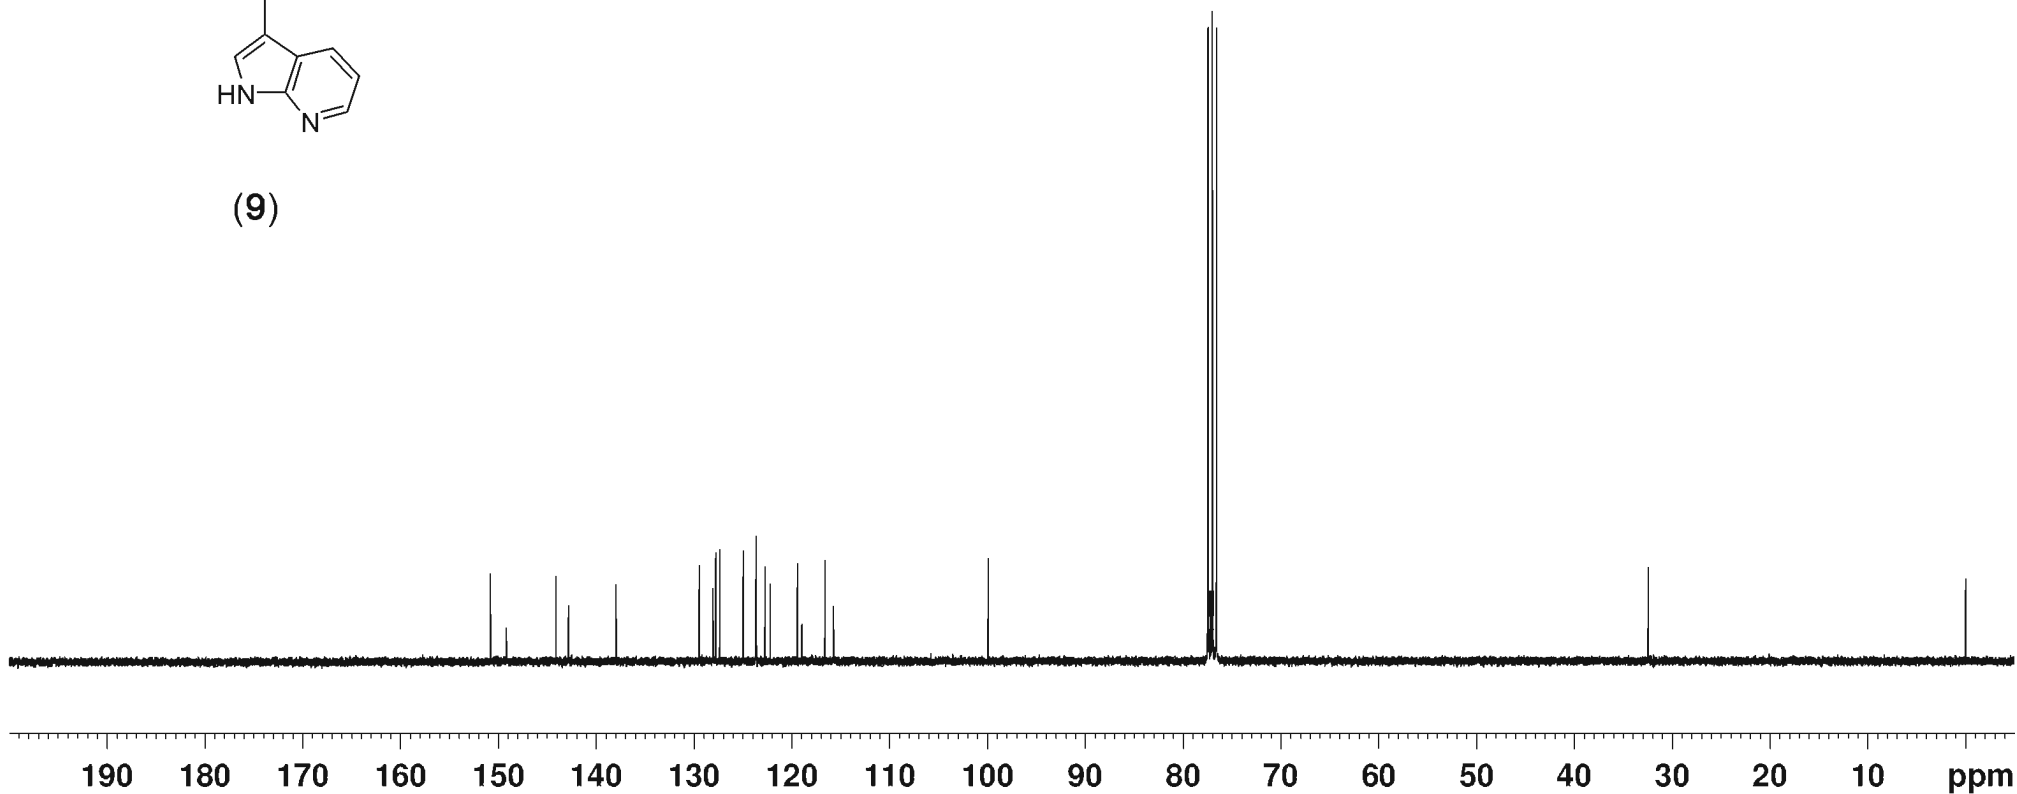



$^1\text{H}$  NMR (300MHz, DMSO- $d_6$ )

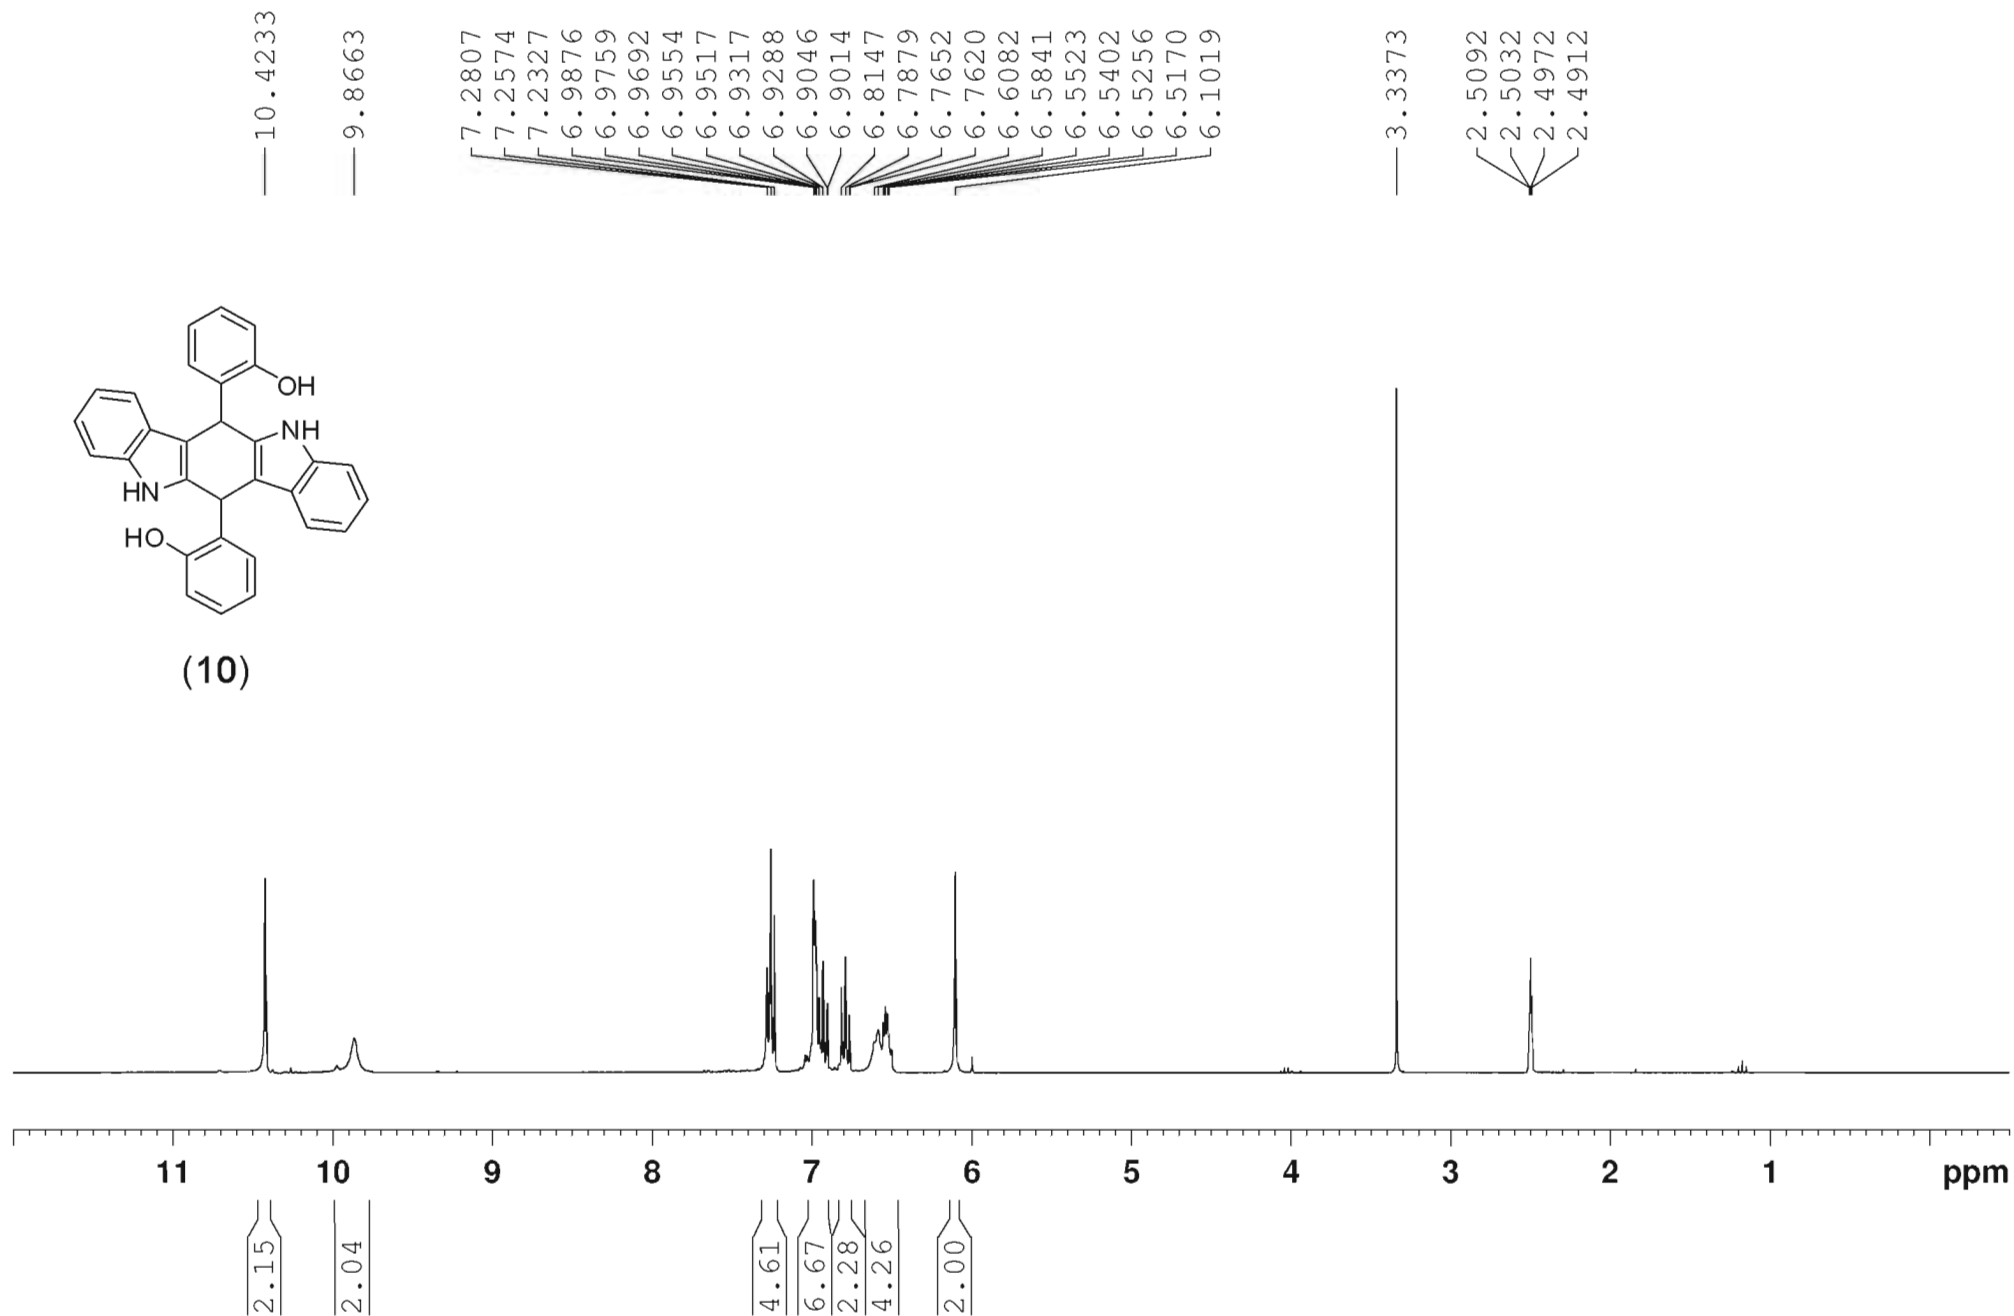

$^{13}\text{C}$  NMR (75MHz, DMSO- $d_6$ )

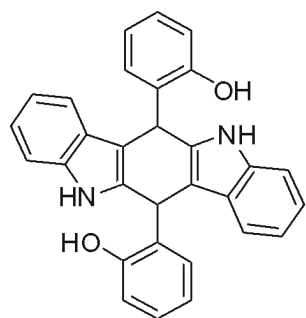

(10)

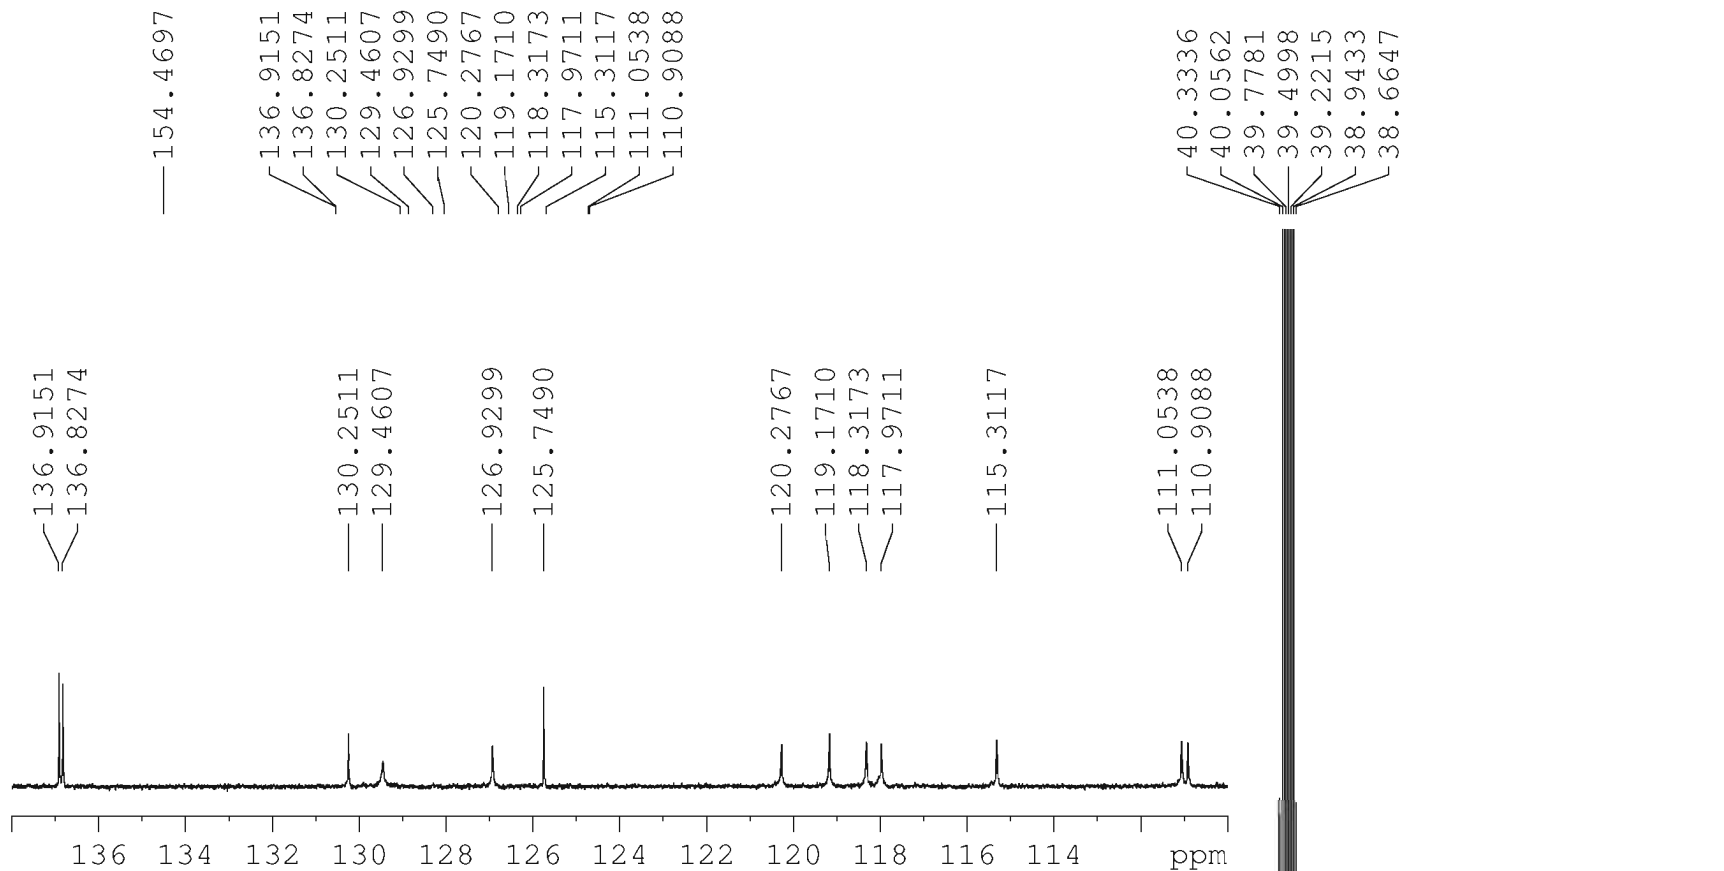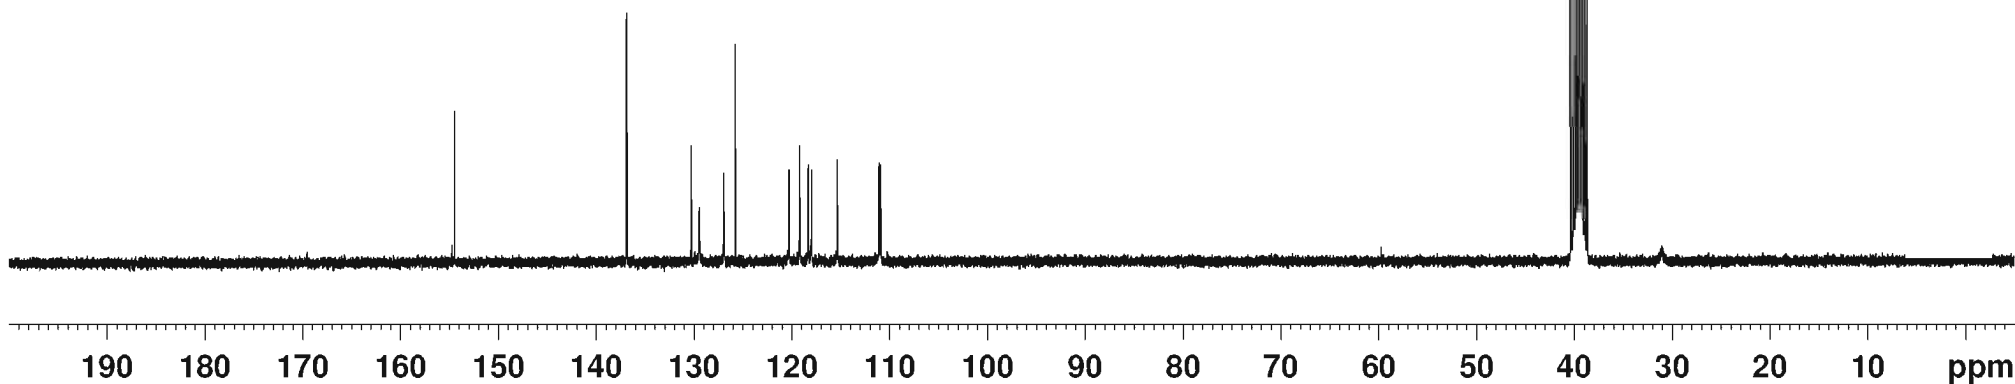

## Mass Spectrum SmartFormula Report

### Analysis Info

Analysis Name D:\20120619\YIN\_1\_APCI\_POS\_000002.d  
Method Metal\_Trypsin digestion  
Sample Name YIN\_1\_APCI\_POS  
Comment

Acquisition Date 2012-6-19 19:00:33

Operator  
Instrument apex-Ultra

### Acquisition Parameter

|                          |           |                         |           |                       |                          |
|--------------------------|-----------|-------------------------|-----------|-----------------------|--------------------------|
| Polarity                 | Positive  | Source                  | APCI      | No. of Laser Shots    | 20                       |
| Averaged Scans           | 2         | No. of Cell Fills       | 1         | Laser Power           | 51.0 %                   |
| Broadband Low Mass       | 100.3 m/z | End Plate               | 1500.0 V  | MALDI Plate           | 300.0 V                  |
| Broadband High Mass      | 600.0 m/z | Capillary Entrance      | 2000.0 V  | Imaging Spot Diameter | 2000.0 µm                |
| Acquisition Mode         | Single MS | Skimmer 1               | 20.0 V    |                       |                          |
| Pulse Program            | basic     | Drying Gas Temperature  | 180.0 °C  | Calibration Date      | Wed Jan 4 05:51:21 2012  |
| Source Accumulation      | 0.0 sec   | Drying Gas Flow Rate    | 4.0 L/min | Data Acquisition Size | 131072                   |
| Ion Accumulation Time    | 0.0 sec   | Nebulizer Gas Flow Rate | 1.0 L/min | Apodization           | Sine-Bell Multiplication |
| Flight Time to Acq. Cell | 0.0 sec   |                         |           |                       |                          |

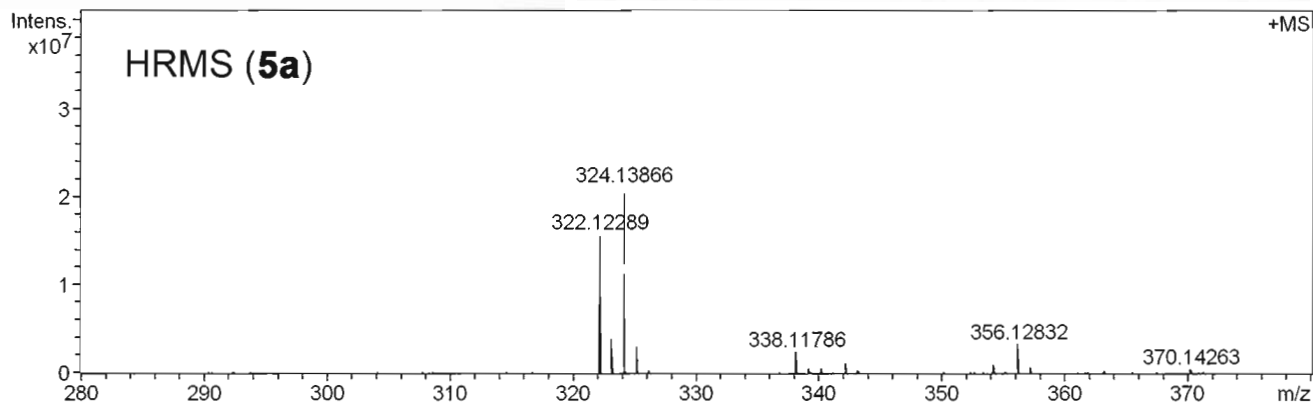

| Meas. m/z | # | Formula                                          | Score  | m/z       | err [mDa] | err [ppm] | mSigma | rdb  | e <sub>1</sub> | Conf | N-Rule |
|-----------|---|--------------------------------------------------|--------|-----------|-----------|-----------|--------|------|----------------|------|--------|
| 324.13866 | 1 | C <sub>23</sub> H <sub>18</sub> N <sub>2</sub> O | 100.00 | 324.13829 | -0.4      | -1.1      | 11.8   | 15.5 |                | even | ok     |

## Mass Spectrum SmartFormula Report

### Analysis Info

Analysis Name D:\20120619\YIN\_2\_APCI\_POS\_000002.d  
Method Metal\_Trypsin digestion  
Sample Name YIN\_2\_APCI\_POS  
Comment

Acquisition Date 2012-6-19 19:01:42

Operator  
Instrument apex-Ultra

### Acquisition Parameter

|                          |           |                         |           |                       |                          |
|--------------------------|-----------|-------------------------|-----------|-----------------------|--------------------------|
| Polarity                 | Positive  | Source                  | APCI      | No. of Laser Shots    | 20                       |
| Averaged Scans           | 2         | No. of Cell Fills       | 1         | Laser Power           | 51.0 %                   |
| Broadband Low Mass       | 100.3 m/z | End Plate               | 1500.0 V  | MALDI Plate           | 300.0 V                  |
| Broadband High Mass      | 600.0 m/z | Capillary Entrance      | 2000.0 V  | Imaging Spot Diameter | 2000.0 µm                |
| Acquisition Mode         | Single MS | Skimmer 1               | 20.0 V    |                       |                          |
| Pulse Program            | basic     | Drying Gas Temperature  | 180.0 °C  | Calibration Date      | Wed Jan 4 05:51:21 2012  |
| Source Accumulation      | 0.0 sec   | Drying Gas Flow Rate    | 4.0 L/min | Data Acquisition Size | 131072                   |
| Ion Accumulation Time    | 0.0 sec   | Nebulizer Gas Flow Rate | 1.0 L/min | Apodization           | Sine-Bell Multiplication |
| Flight Time to Acq. Cell | 0.0 sec   |                         |           |                       |                          |

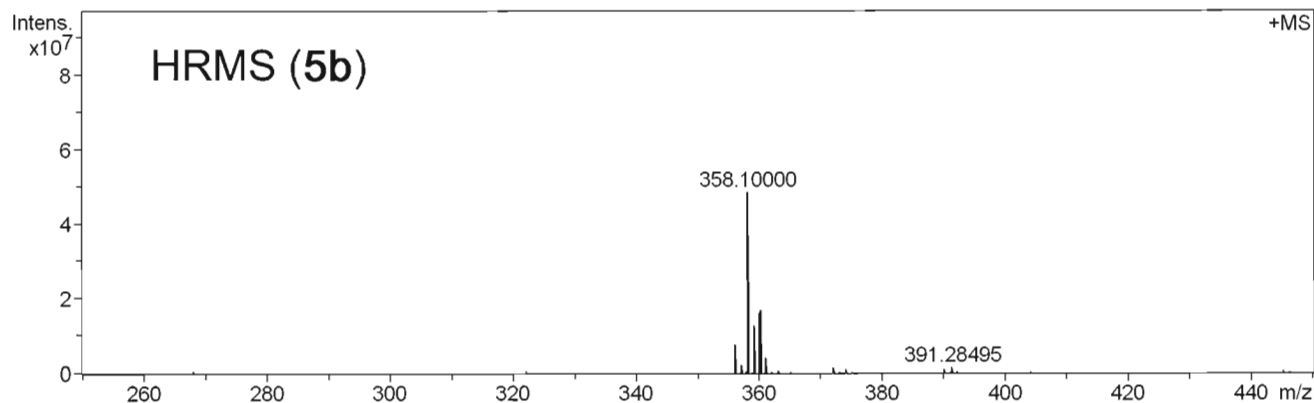

| Meas. m/z | # | Formula                                            | Score  | m/z       | err [mDa] | err [ppm] | mSigma | rdb  | ej | Conf | N-Rule |
|-----------|---|----------------------------------------------------|--------|-----------|-----------|-----------|--------|------|----|------|--------|
| 358.10000 | 1 | C <sub>23</sub> H <sub>17</sub> ClN <sub>2</sub> O | 100.00 | 358.09932 | -0.7      | -1.9      | 3.6    | 15.5 |    | even | ok     |

## Mass Spectrum SmartFormula Report

### Analysis Info

Analysis Name D:\20120619\YIN\_3\_APCI\_POS\_000002.d  
Method Metal\_Trypsin digestion  
Sample Name YIN\_3\_APCI\_POS  
Comment

Acquisition Date 2012-6-19 19:02:53

Operator  
Instrument apex-Ultra

### Acquisition Parameter

|                          |           |                         |           |                       |                          |
|--------------------------|-----------|-------------------------|-----------|-----------------------|--------------------------|
| Polarity                 | Positive  | Source                  | APCI      | No. of Laser Shots    | 20                       |
| Averaged Scans           | 2         | No. of Cell Fills       | 1         | Laser Power           | 51.0 %                   |
| Broadband Low Mass       | 100.3 m/z | End Plate               | 1500.0 V  | MALDI Plate           | 300.0 V                  |
| Broadband High Mass      | 600.0 m/z | Capillary Entrance      | 2000.0 V  | Imaging Spot Diameter | 2000.0 µm                |
| Acquisition Mode         | Single MS | Skimmer 1               | 20.0 V    |                       |                          |
| Pulse Program            | basic     | Drying Gas Temperature  | 180.0 °C  | Calibration Date      | Wed Jan 4 05:51:21 2012  |
| Source Accumulation      | 0.0 sec   | Drying Gas Flow Rate    | 4.0 L/min | Data Acquisition Size | 131072                   |
| Ion Accumulation Time    | 0.0 sec   | Nebulizer Gas Flow Rate | 1.0 L/min | Apodization           | Sine-Bell Multiplication |
| Flight Time to Acq. Cell | 0.0 sec   |                         |           |                       |                          |

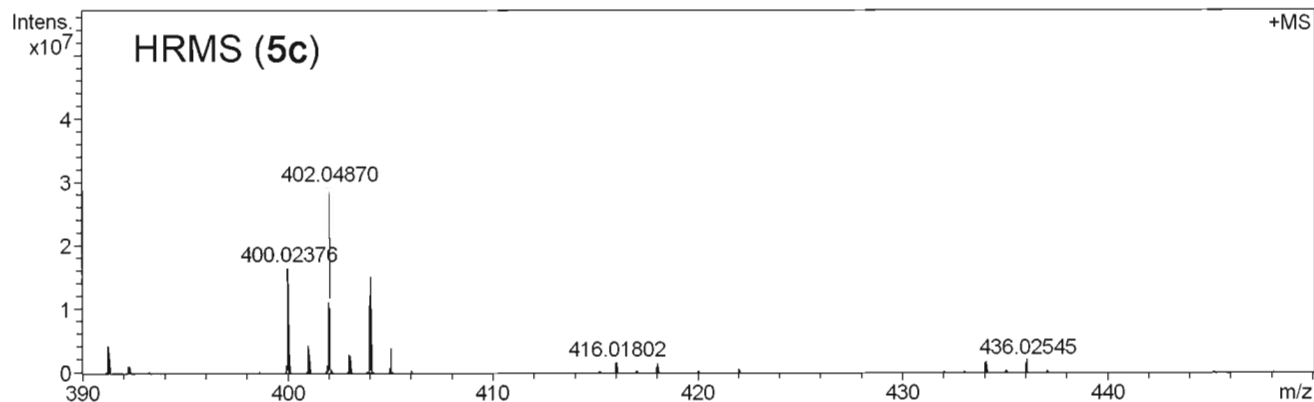

| Meas. m/z | # | Formula                                           | Score  | m/z       | err [mDa] | err [ppm] | mSigma | rdb  | e <sup>-</sup> Conf | N-Rule |
|-----------|---|---------------------------------------------------|--------|-----------|-----------|-----------|--------|------|---------------------|--------|
| 402.01318 | 1 | C <sub>22</sub> H <sub>13</sub> BrNO <sub>2</sub> | 100.00 | 402.01242 | -0.8      | -1.9      | 459.8  | 16.5 | even                | ok     |
| 402.04870 | 1 | C <sub>23</sub> H <sub>17</sub> BrNO              | 100.00 | 402.04880 | 0.1       | 0.3       | 148.3  | 15.5 | even                | ok     |

## Mass Spectrum SmartFormula Report

### Analysis Info

Analysis Name D:\20120619\YIN\_4\_APCI\_POS\_000002.d  
Method Metal\_Trypsin digestion  
Sample Name YIN\_4\_APCI\_POS  
Comment

Acquisition Date 2012-6-19 19:04:08

Operator  
Instrument apex-Ultra

### Acquisition Parameter

|                          |           |                         |           |                       |                          |
|--------------------------|-----------|-------------------------|-----------|-----------------------|--------------------------|
| Polarity                 | Positive  | Source                  | APCI      | No. of Laser Shots    | 20                       |
| Averaged Scans           | 2         | No. of Cell Fills       | 1         | Laser Power           | 51.0 %                   |
| Broadband Low Mass       | 100.3 m/z | End Plate               | 1500.0 V  | MALDI Plate           | 300.0 V                  |
| Broadband High Mass      | 600.0 m/z | Capillary Entrance      | 2000.0 V  | Imaging Spot Diameter | 2000.0 µm                |
| Acquisition Mode         | Single MS | Skimmer 1               | 20.0 V    |                       |                          |
| Pulse Program            | basic     | Drying Gas Temperature  | 180.0 °C  | Calibration Date      | Wed Jan 4 05:51:21 2012  |
| Source Accumulation      | 0.0 sec   | Drying Gas Flow Rate    | 4.0 L/min | Data Acquisition Size | 131072                   |
| Ion Accumulation Time    | 0.0 sec   | Nebulizer Gas Flow Rate | 1.0 L/min | Apodization           | Sine-Bell Multiplication |
| Flight Time to Acq. Cell | 0.0 sec   |                         |           |                       |                          |

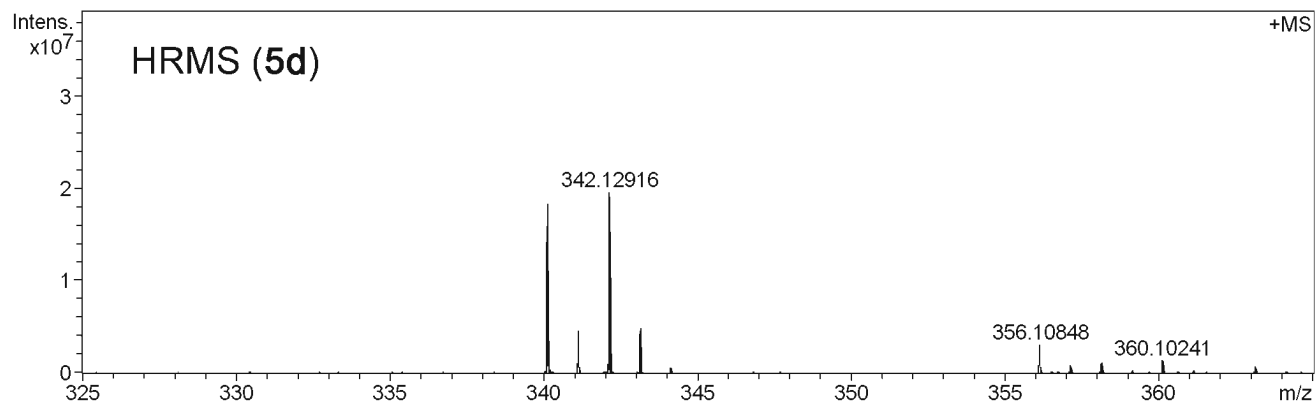

| Meas. m/z | # | Formula                             | Score  | m/z       | err [mDa] | err [ppm] | mSigma | rdb  | e <sup>-</sup> | Conf | N-Rule |
|-----------|---|-------------------------------------|--------|-----------|-----------|-----------|--------|------|----------------|------|--------|
| 342.12916 | 1 | C <sub>23</sub> H <sub>17</sub> FNO | 100.00 | 342.12887 | -0.3      | -0.9      | 0.8    | 15.5 | even           |      | ok     |

## Mass Spectrum SmartFormula Report

### Analysis Info

Analysis Name D:\20120619\YIN\_5\_APCI\_POS\_000002.d  
Method Metal\_Trypsin digestion  
Sample Name YIN\_5\_APCI\_POS  
Comment

Acquisition Date 2012-6-19 19:05:11

Operator  
Instrument apex-Ultra

### Acquisition Parameter

|                          |           |                         |           |                       |                          |
|--------------------------|-----------|-------------------------|-----------|-----------------------|--------------------------|
| Polarity                 | Positive  | Source                  | APCI      | No. of Laser Shots    | 20                       |
| Averaged Scans           | 4         | No. of Cell Fills       | 1         | Laser Power           | 51.0 %                   |
| Broadband Low Mass       | 100.3 m/z | End Plate               | 1500.0 V  | MALDI Plate           | 300.0 V                  |
| Broadband High Mass      | 600.0 m/z | Capillary Entrance      | 2000.0 V  | Imaging Spot Diameter | 2000.0 µm                |
| Acquisition Mode         | Single MS | Skimmer 1               | 20.0 V    |                       |                          |
| Pulse Program            | basic     | Drying Gas Temperature  | 180.0 °C  | Calibration Date      | Wed Jan 4 05:51:21 2012  |
| Source Accumulation      | 0.0 sec   | Drying Gas Flow Rate    | 4.0 L/min | Data Acquisition Size | 131072                   |
| Ion Accumulation Time    | 0.0 sec   | Nebulizer Gas Flow Rate | 1.0 L/min | Apodization           | Sine-Bell Multiplication |
| Flight Time to Acq. Cell | 0.0 sec   |                         |           |                       |                          |

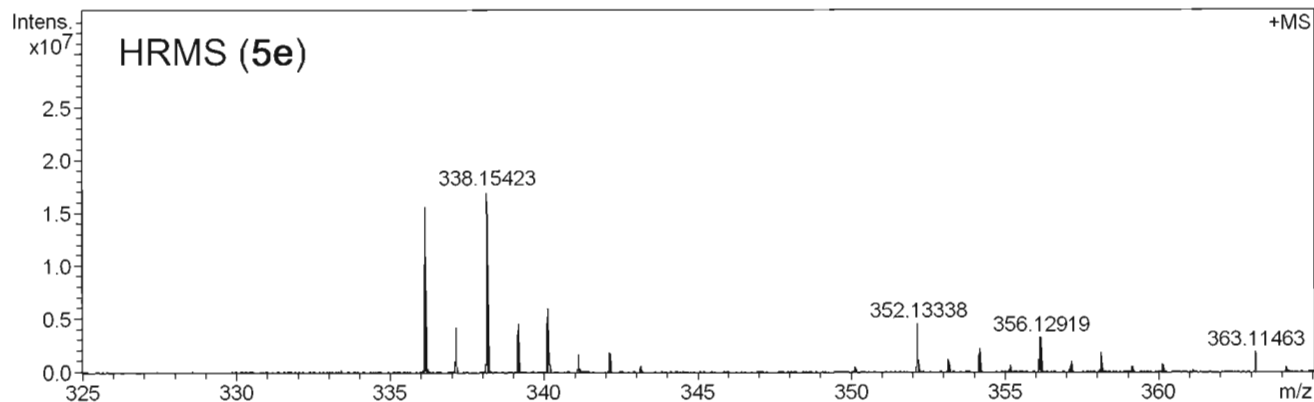

| Meas. m/z | # | Formula                                          | Score  | m/z       | err [mDa] | err [ppm] | mSigma | rdb  | e <sub>i</sub> | Conf | N-Rule |
|-----------|---|--------------------------------------------------|--------|-----------|-----------|-----------|--------|------|----------------|------|--------|
| 338.15423 | 1 | C <sub>24</sub> H <sub>20</sub> N <sub>2</sub> O | 100.00 | 338.15394 | -0.3      | -0.8      | 42.5   | 15.5 |                | even | ok     |

## Mass Spectrum SmartFormula Report

### Analysis Info

Analysis Name D:\20120619\YIN\_6\_APCI\_POS\_000002.d  
Method Metal\_Trypsin digestion  
Sample Name YIN\_6\_APCI\_POS  
Comment

Acquisition Date 2012-6-19 19:06:18

Operator  
Instrument apex-Ultra

### Acquisition Parameter

|                          |           |                         |           |                       |                          |
|--------------------------|-----------|-------------------------|-----------|-----------------------|--------------------------|
| Polarity                 | Positive  | Source                  | APCI      | No. of Laser Shots    | 20                       |
| Averaged Scans           | 2         | No. of Cell Fills       | 1         | Laser Power           | 51.0 %                   |
| Broadband Low Mass       | 100.3 m/z | End Plate               | 1500.0 V  | MALDI Plate           | 300.0 V                  |
| Broadband High Mass      | 600.0 m/z | Capillary Entrance      | 2000.0 V  | Imaging Spot Diameter | 2000.0 µm                |
| Acquisition Mode         | Single MS | Skimmer 1               | 20.0 V    |                       |                          |
| Pulse Program            | basic     | Drying Gas Temperature  | 180.0 °C  | Calibration Date      | Wed Jan 4 05:51:21 2012  |
| Source Accumulation      | 0.0 sec   | Drying Gas Flow Rate    | 4.0 L/min | Data Acquisition Size | 131072                   |
| Ion Accumulation Time    | 0.0 sec   | Nebulizer Gas Flow Rate | 1.0 L/min | Apodization           | Sine-Bell Multiplication |
| Flight Time to Acq. Cell | 0.0 sec   |                         |           |                       |                          |

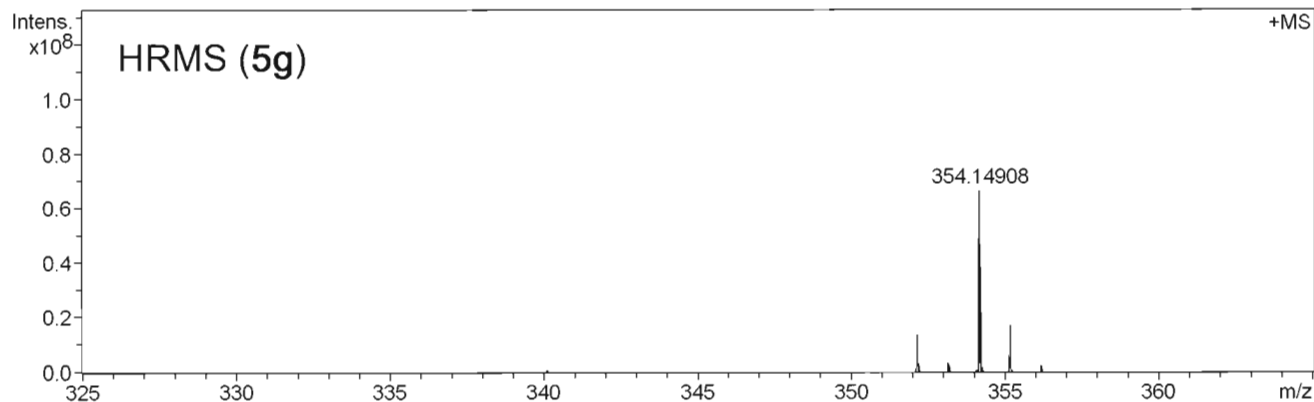

| Meas. m/z | # | Formula                                                       | Score  | m/z       | err [mDa] | err [ppm] | mSigma | rdb  | ej | Conf | N-Rule |
|-----------|---|---------------------------------------------------------------|--------|-----------|-----------|-----------|--------|------|----|------|--------|
| 354.14908 | 1 | C <sub>24</sub> H <sub>20</sub> N <sub>2</sub> O <sub>2</sub> | 100.00 | 354.14886 | -0.2      | -0.6      | 5.7    | 15.5 |    | even | ok     |



## Mass Spectrum SmartFormula Report

### Analysis Info

Analysis Name D:\20120619\YIN\_7\_APCI\_POS\_000002.d  
Method Metal\_Trypsin digestion  
Sample Name YIN\_7\_APCI\_POS  
Comment

Acquisition Date 2012-6-19 19:07:22

Operator  
Instrument apex-Ultra

### Acquisition Parameter

|                          |           |                         |           |                       |                          |
|--------------------------|-----------|-------------------------|-----------|-----------------------|--------------------------|
| Polarity                 | Positive  | Source                  | APCI      | No. of Laser Shots    | 20                       |
| Averaged Scans           | 2         | No. of Cell Fills       | 1         | Laser Power           | 51.0 %                   |
| Broadband Low Mass       | 100.3 m/z | End Plate               | 1500.0 V  | MALDI Plate           | 300.0 V                  |
| Broadband High Mass      | 600.0 m/z | Capillary Entrance      | 2000.0 V  | Imaging Spot Diameter | 2000.0 µm                |
| Acquisition Mode         | Single MS | Skimmer 1               | 20.0 V    |                       |                          |
| Pulse Program            | basic     | Drying Gas Temperature  | 180.0 °C  | Calibration Date      | Wed Jan 4 05:51:21 2012  |
| Source Accumulation      | 0.0 sec   | Drying Gas Flow Rate    | 4.0 L/min | Data Acquisition Size | 131072                   |
| Ion Accumulation Time    | 0.0 sec   | Nebulizer Gas Flow Rate | 1.0 L/min | Apodization           | Sine-Bell Multiplication |
| Flight Time to Acq. Cell | 0.0 sec   |                         |           |                       |                          |

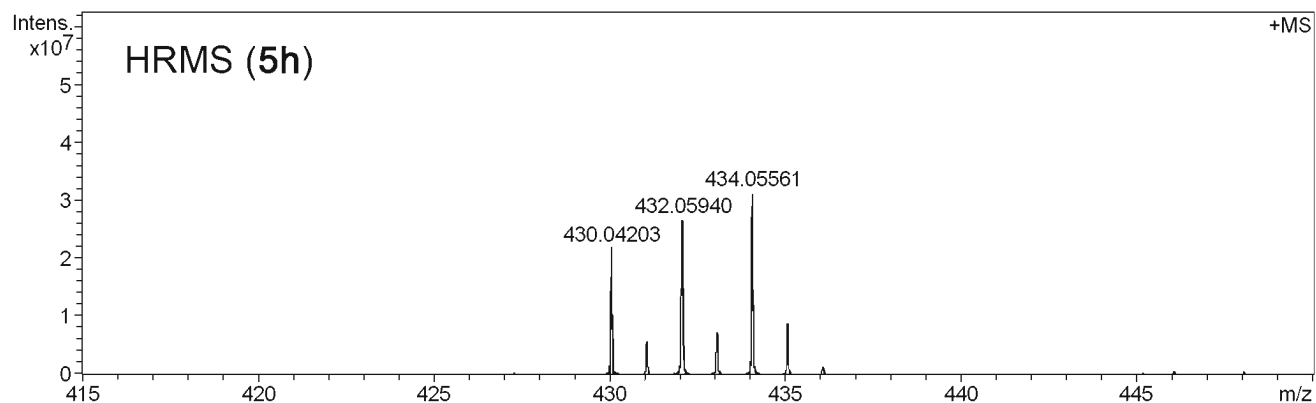

| Meas. m/z | # | Formula                                           | Score  | m/z       | err [mDa] | err [ppm] | mSigma | rdb  | e <sub>4</sub> Conf | N-Rule |
|-----------|---|---------------------------------------------------|--------|-----------|-----------|-----------|--------|------|---------------------|--------|
| 432.05940 | 1 | C <sub>24</sub> H <sub>19</sub> BrNO <sub>2</sub> | 100.00 | 432.05937 | -0.0      | -0.1      | 64.0   | 15.5 | even                | ok     |

## Mass Spectrum SmartFormula Report

### Analysis Info

Analysis Name D:\20120619\YIN\_8\_APCI\_POS\_000002.d  
Method Metal\_Trypsin digestion  
Sample Name YIN\_8\_APCI\_POS  
Comment

Acquisition Date 2012-6-19 19:08:26

Operator  
Instrument apex-Ultra

### Acquisition Parameter

|                          |           |                         |           |                       |                          |
|--------------------------|-----------|-------------------------|-----------|-----------------------|--------------------------|
| Polarity                 | Positive  | Source                  | APCI      | No. of Laser Shots    | 20                       |
| Averaged Scans           | 2         | No. of Cell Fills       | 1         | Laser Power           | 51.0 %                   |
| Broadband Low Mass       | 100.3 m/z | End Plate               | 1500.0 V  | MALDI Plate           | 300.0 V                  |
| Broadband High Mass      | 600.0 m/z | Capillary Entrance      | 2000.0 V  | Imaging Spot Diameter | 2000.0 µm                |
| Acquisition Mode         | Single MS | Skimmer 1               | 20.0 V    |                       |                          |
| Pulse Program            | basic     | Drying Gas Temperature  | 180.0 °C  | Calibration Date      | Wed Jan 4 05:51:21 2012  |
| Source Accumulation      | 0.0 sec   | Drying Gas Flow Rate    | 4.0 L/min | Data Acquisition Size | 131072                   |
| Ion Accumulation Time    | 0.0 sec   | Nebulizer Gas Flow Rate | 1.0 L/min | Apodization           | Sine-Bell Multiplication |
| Flight Time to Acq. Cell | 0.0 sec   |                         |           |                       |                          |

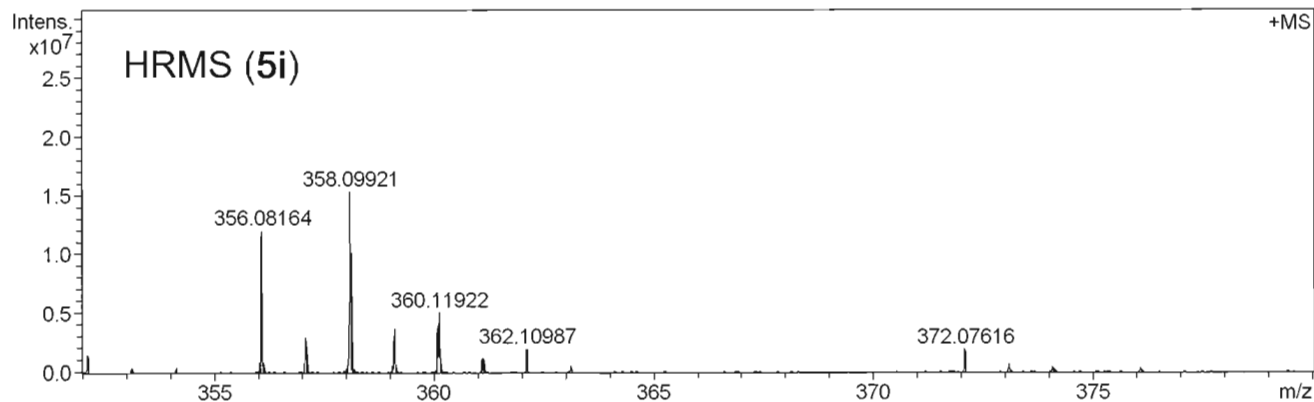

| Meas. m/z | # | Formula                              | Score  | m/z       | err [mDa] | err [ppm] | mSigma | rdb  | e <sub>j</sub> | Conf | N-Rule |
|-----------|---|--------------------------------------|--------|-----------|-----------|-----------|--------|------|----------------|------|--------|
| 358.09921 | 1 | C <sub>23</sub> H <sub>17</sub> ClNO | 100.00 | 358.09932 | 0.1       | 0.3       | 67.1   | 15.5 |                | even | ok     |

## Mass Spectrum SmartFormula Report

### Analysis Info

Analysis Name D:\20120619\YIN\_9\_APCI\_POS\_000002.d  
Method Metal\_Trypsin digestion  
Sample Name YIN\_9\_APCI\_POS  
Comment

Acquisition Date 2012-6-19 19:09:23

Operator  
Instrument apex-Ultra

### Acquisition Parameter

|                          |           |                         |           |                       |                          |
|--------------------------|-----------|-------------------------|-----------|-----------------------|--------------------------|
| Polarity                 | Positive  | Source                  | APCI      | No. of Laser Shots    | 20                       |
| Averaged Scans           | 2         | No. of Cell Fills       | 1         | Laser Power           | 51.0 %                   |
| Broadband Low Mass       | 100.3 m/z | End Plate               | 1500.0 V  | MALDI Plate           | 300.0 V                  |
| Broadband High Mass      | 600.0 m/z | Capillary Entrance      | 2000.0 V  | Imaging Spot Diameter | 2000.0 µm                |
| Acquisition Mode         | Single MS | Skimmer 1               | 20.0 V    |                       |                          |
| Pulse Program            | basic     | Drying Gas Temperature  | 180.0 °C  | Calibration Date      | Wed Jan 4 05:51:21 2012  |
| Source Accumulation      | 0.0 sec   | Drying Gas Flow Rate    | 4.0 L/min | Data Acquisition Size | 131072                   |
| Ion Accumulation Time    | 0.0 sec   | Nebulizer Gas Flow Rate | 1.0 L/min | Apodization           | Sine-Bell Multiplication |
| Flight Time to Acq. Cell | 0.0 sec   |                         |           |                       |                          |

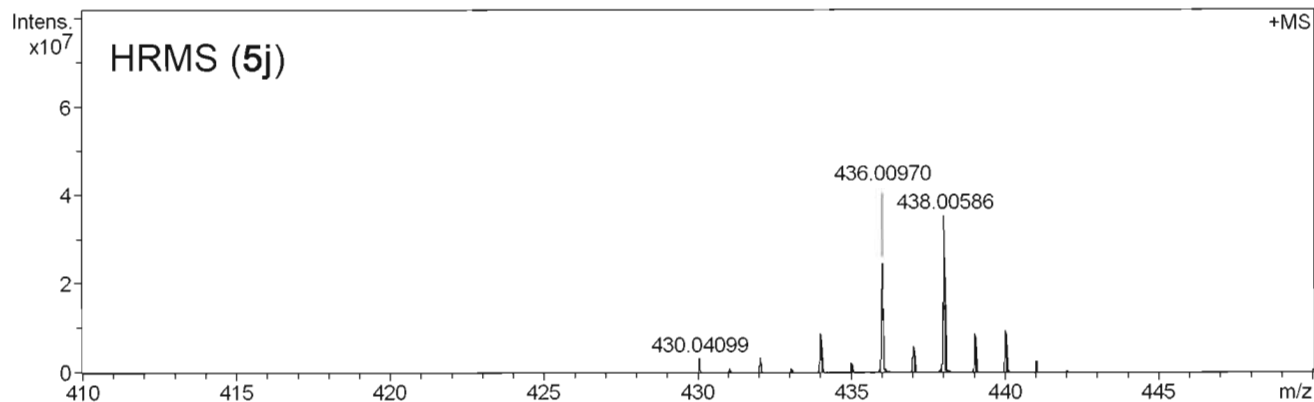

| Meas. m/z | # | Formula                                | Score  | m/z       | err [mDa] | err [ppm] | mSigma | rdb  | e <sub>j</sub> | Conf | N-Rule |
|-----------|---|----------------------------------------|--------|-----------|-----------|-----------|--------|------|----------------|------|--------|
| 436.00970 | 1 | C <sub>23</sub> H <sub>16</sub> BrClNO | 100.00 | 436.00983 | 0.1       | 0.3       | 27.6   | 15.5 | even           |      | ok     |

## Mass Spectrum SmartFormula Report

### Analysis Info

Analysis Name D:\20120619\YIN\_10\_APCI\_POS\_000002.d  
Method Metal\_Trypsin digestion  
Sample Name YIN\_10\_APCI\_POS  
Comment

Acquisition Date 2012-6-19 19:10:20

Operator  
Instrument apex-Ultra

### Acquisition Parameter

|                          |           |                         |           |                       |                          |
|--------------------------|-----------|-------------------------|-----------|-----------------------|--------------------------|
| Polarity                 | Positive  | Source                  | APCI      | No. of Laser Shots    | 20                       |
| Averaged Scans           | 2         | No. of Cell Fills       | 1         | Laser Power           | 51.0 %                   |
| Broadband Low Mass       | 100.3 m/z | End Plate               | 1500.0 V  | MALDI Plate           | 300.0 V                  |
| Broadband High Mass      | 600.0 m/z | Capillary Entrance      | 2000.0 V  | Imaging Spot Diameter | 2000.0 µm                |
| Acquisition Mode         | Single MS | Skimmer 1               | 20.0 V    |                       |                          |
| Pulse Program            | basic     | Drying Gas Temperature  | 180.0 °C  | Calibration Date      | Wed Jan 4 05:51:21 2012  |
| Source Accumulation      | 0.0 sec   | Drying Gas Flow Rate    | 4.0 L/min | Data Acquisition Size | 131072                   |
| Ion Accumulation Time    | 0.0 sec   | Nebulizer Gas Flow Rate | 1.0 L/min | Apodization           | Sine-Bell Multiplication |
| Flight Time to Acq. Cell | 0.0 sec   |                         |           |                       |                          |

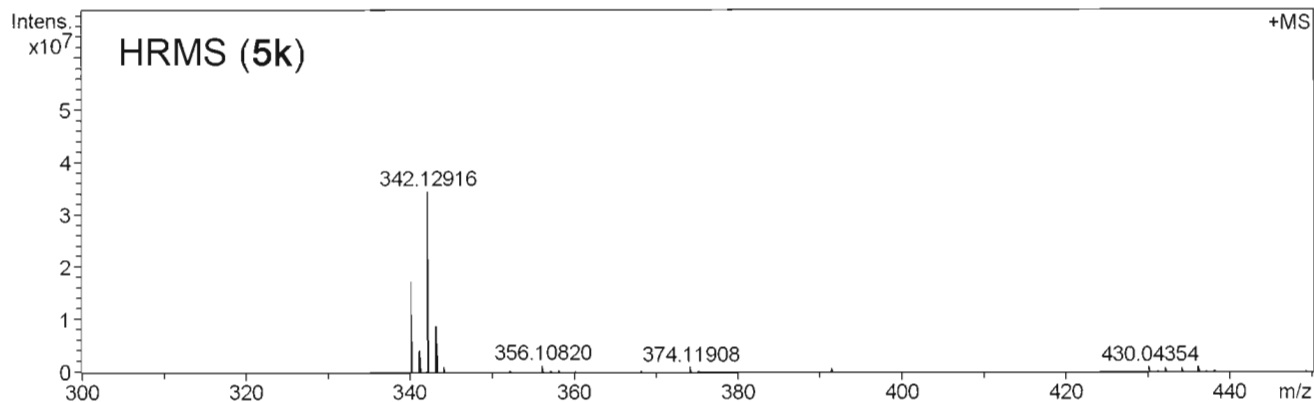

| Meas. m/z | # | Formula                                                         | Score  | m/z       | err [mDa] | err [ppm] | mSigma | rdb  | ej   | Conf | N-Rule |
|-----------|---|-----------------------------------------------------------------|--------|-----------|-----------|-----------|--------|------|------|------|--------|
| 342.12916 | 1 | C <sub>23</sub> H <sub>17</sub> F <sub>2</sub> N <sub>2</sub> O | 100.00 | 342.12887 | -0.3      | -0.9      | 3.8    | 15.5 | even |      | ok     |

## Mass Spectrum SmartFormula Report

### Analysis Info

Analysis Name D:\20120619\YIN\_16\_APCI\_POS\_000002.d  
Method Metal\_Trypsin digestion  
Sample Name YIN\_16\_APCI\_POS  
Comment

Acquisition Date 2012-6-19 19:17:11

Operator  
Instrument apex-Ultra

### Acquisition Parameter

|                          |           |                         |           |                       |                          |
|--------------------------|-----------|-------------------------|-----------|-----------------------|--------------------------|
| Polarity                 | Positive  | Source                  | APCI      | No. of Laser Shots    | 20                       |
| Averaged Scans           | 2         | No. of Cell Fills       | 1         | Laser Power           | 51.0 %                   |
| Broadband Low Mass       | 100.3 m/z | End Plate               | 1500.0 V  | MALDI Plate           | 300.0 V                  |
| Broadband High Mass      | 600.0 m/z | Capillary Entrance      | 2000.0 V  | Imaging Spot Diameter | 2000.0 µm                |
| Acquisition Mode         | Single MS | Skimmer 1               | 20.0 V    |                       |                          |
| Pulse Program            | basic     | Drying Gas Temperature  | 180.0 °C  | Calibration Date      | Wed Jan 4 05:51:21 2012  |
| Source Accumulation      | 0.0 sec   | Drying Gas Flow Rate    | 4.0 L/min | Data Acquisition Size | 131072                   |
| Ion Accumulation Time    | 0.0 sec   | Nebulizer Gas Flow Rate | 1.0 L/min | Apodization           | Sine-Bell Multiplication |
| Flight Time to Acq. Cell | 0.0 sec   |                         |           |                       |                          |

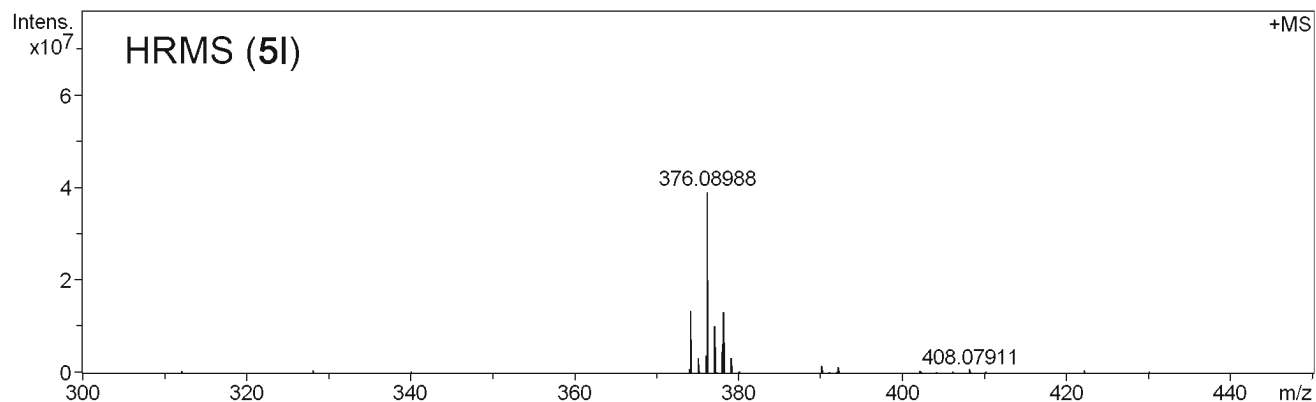

| Meas. m/z | # | Formula                | Score  | m/z       | err [mDa] | err [ppm] | mSig ma | rdb  | e;¥ Conf | N-R ule |
|-----------|---|------------------------|--------|-----------|-----------|-----------|---------|------|----------|---------|
| 376.08988 | 1 | C 23 H 16 Cl F N O     | 100.00 | 376.08990 | 0.0       | 0.0       | 7.0     | 15.5 | even     | ok      |
|           | 2 | C 20 H 17 Cl F 2 N O 2 | 43.28  | 376.09104 | 1.2       | 3.1       | 20.7    | 11.5 | even     | ok      |
|           | 3 | C 18 H 16 Cl F 5 N     | 31.79  | 376.08859 | -1.3      | -3.4      | 30.8    | 8.5  | even     | ok      |

## Mass Spectrum SmartFormula Report

### Analysis Info

Analysis Name D:\20120619\YIN\_15\_APCI\_POS\_000002.d  
Method Metal\_Trypsin digestion  
Sample Name YIN\_15\_APCI\_POS  
Comment

Acquisition Date 2012-6-19 19:15:22

Operator  
Instrument apex-Ultra

### Acquisition Parameter

|                          |           |                         |           |                       |                          |
|--------------------------|-----------|-------------------------|-----------|-----------------------|--------------------------|
| Polarity                 | Positive  | Source                  | APCI      | No. of Laser Shots    | 20                       |
| Averaged Scans           | 2         | No. of Cell Fills       | 1         | Laser Power           | 51.0 %                   |
| Broadband Low Mass       | 100.3 m/z | End Plate               | 1500.0 V  | MALDI Plate           | 300.0 V                  |
| Broadband High Mass      | 600.0 m/z | Capillary Entrance      | 2000.0 V  | Imaging Spot Diameter | 2000.0 µm                |
| Acquisition Mode         | Single MS | Skimmer 1               | 20.0 V    |                       |                          |
| Pulse Program            | basic     | Drying Gas Temperature  | 180.0 °C  | Calibration Date      | Wed Jan 4 05:51:21 2012  |
| Source Accumulation      | 0.0 sec   | Drying Gas Flow Rate    | 4.0 L/min | Data Acquisition Size | 131072                   |
| Ion Accumulation Time    | 0.0 sec   | Nebulizer Gas Flow Rate | 1.0 L/min | Apodization           | Sine-Bell Multiplication |
| Flight Time to Acq. Cell | 0.0 sec   |                         |           |                       |                          |

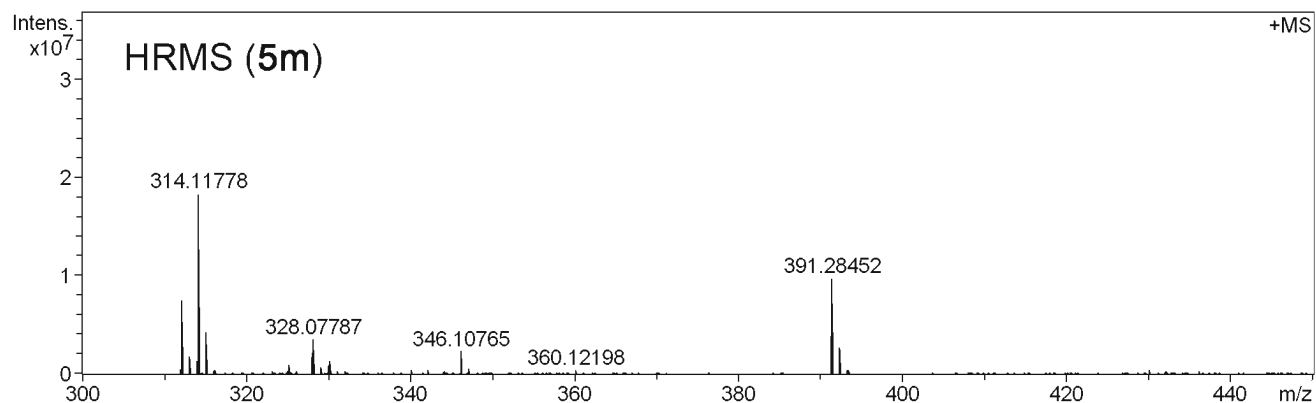

| Meas. m/z | # | Formula                                                       | Score  | m/z       | err [mDa] | err [ppm] | mSigma | rdb  | e <sub>1</sub> | Conf | N-Rule |
|-----------|---|---------------------------------------------------------------|--------|-----------|-----------|-----------|--------|------|----------------|------|--------|
| 314.11778 | 1 | C <sub>21</sub> H <sub>16</sub> N <sub>2</sub> O <sub>2</sub> | 100.00 | 314.11756 | -0.2      | -0.7      | 3.2    | 14.5 | even           |      | ok     |

## Mass Spectrum SmartFormula Report

### Analysis Info

Analysis Name D:\20120619\YIN\_14\_APCI\_POS\_000002.d  
Method Metal\_Trypsin digestion  
Sample Name YIN\_14\_APCI\_POS  
Comment

Acquisition Date 2012-6-19 19:14:18

Operator  
Instrument apex-Ultra

### Acquisition Parameter

|                          |           |                         |           |                       |                          |
|--------------------------|-----------|-------------------------|-----------|-----------------------|--------------------------|
| Polarity                 | Positive  | Source                  | APCI      | No. of Laser Shots    | 20                       |
| Averaged Scans           | 2         | No. of Cell Fills       | 1         | Laser Power           | 51.0 %                   |
| Broadband Low Mass       | 100.3 m/z | End Plate               | 1500.0 V  | MALDI Plate           | 300.0 V                  |
| Broadband High Mass      | 600.0 m/z | Capillary Entrance      | 2000.0 V  | Imaging Spot Diameter | 2000.0 µm                |
| Acquisition Mode         | Single MS | Skimmer 1               | 20.0 V    |                       |                          |
| Pulse Program            | basic     | Drying Gas Temperature  | 180.0 °C  | Calibration Date      | Wed Jan 4 05:51:21 2012  |
| Source Accumulation      | 0.0 sec   | Drying Gas Flow Rate    | 4.0 L/min | Data Acquisition Size | 131072                   |
| Ion Accumulation Time    | 0.0 sec   | Nebulizer Gas Flow Rate | 1.0 L/min | Apodization           | Sine-Bell Multiplication |
| Flight Time to Acq. Cell | 0.0 sec   |                         |           |                       |                          |

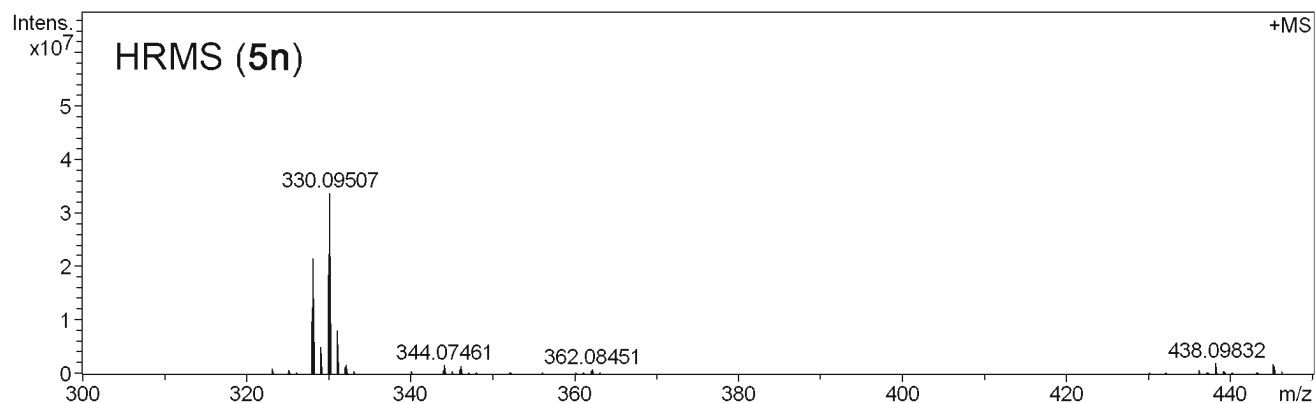

| Meas. m/z | # | Formula                                                       | Score  | m/z       | err [mDa] | err [ppm] | mSigma | rdb  | e <sub>j</sub> | Conf | N-Rule |
|-----------|---|---------------------------------------------------------------|--------|-----------|-----------|-----------|--------|------|----------------|------|--------|
| 330.09507 | 1 | C <sub>21</sub> H <sub>16</sub> N <sub>1</sub> O <sub>5</sub> | 100.00 | 330.09471 | -0.4      | -1.1      | 19.2   | 14.5 |                | even | ok     |

## Mass Spectrum SmartFormula Report

### Analysis Info

Analysis Name D:\20120619\YIN\_13\_APCI\_POS\_000002.d  
Method Metal\_Trypsin digestion  
Sample Name YIN\_13\_APCI\_POS  
Comment

Acquisition Date 2012-6-19 19:13:22

Operator  
Instrument apex-Ultra

### Acquisition Parameter

|                          |           |                         |           |                       |                          |
|--------------------------|-----------|-------------------------|-----------|-----------------------|--------------------------|
| Polarity                 | Positive  | Source                  | APCI      | No. of Laser Shots    | 20                       |
| Averaged Scans           | 2         | No. of Cell Fills       | 1         | Laser Power           | 51.0 %                   |
| Broadband Low Mass       | 100.3 m/z | End Plate               | 1500.0 V  | MALDI Plate           | 300.0 V                  |
| Broadband High Mass      | 600.0 m/z | Capillary Entrance      | 2000.0 V  | Imaging Spot Diameter | 2000.0 µm                |
| Acquisition Mode         | Single MS | Skimmer 1               | 20.0 V    |                       |                          |
| Pulse Program            | basic     | Drying Gas Temperature  | 180.0 °C  | Calibration Date      | Wed Jan 4 05:51:21 2012  |
| Source Accumulation      | 0.0 sec   | Drying Gas Flow Rate    | 4.0 L/min | Data Acquisition Size | 131072                   |
| Ion Accumulation Time    | 0.0 sec   | Nebulizer Gas Flow Rate | 1.0 L/min | Apodization           | Sine-Bell Multiplication |
| Flight Time to Acq. Cell | 0.0 sec   |                         |           |                       |                          |

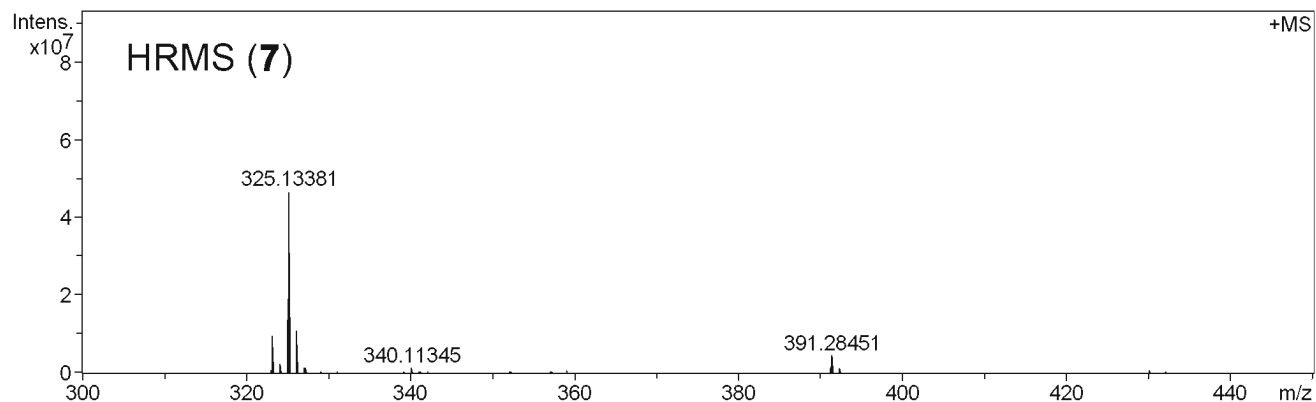

| Meas. m/z | # | Formula                                          | Score  | m/z       | err [mDa] | err [ppm] | mSigma | rdb  | e <sub>i</sub> | Conf | N-Rule |
|-----------|---|--------------------------------------------------|--------|-----------|-----------|-----------|--------|------|----------------|------|--------|
| 325.13381 | 1 | C <sub>22</sub> H <sub>17</sub> N <sub>2</sub> O | 100.00 | 325.13354 | -0.3      | -0.8      | 5.0    | 15.5 |                | even | ok     |



## Mass Spectrum SmartFormula Report

### Analysis Info

Analysis Name D:\20120619\YIN\_12\_APCI\_POS\_000002.d  
Method Metal\_Trypsin digestion  
Sample Name YIN\_12\_APCI\_POS  
Comment

Acquisition Date 2012-6-19 19:12:27

Operator  
Instrument apex-Ultra

### Acquisition Parameter

|                          |           |                         |           |                       |                          |
|--------------------------|-----------|-------------------------|-----------|-----------------------|--------------------------|
| Polarity                 | Positive  | Source                  | APCI      | No. of Laser Shots    | 20                       |
| Averaged Scans           | 2         | No. of Cell Fills       | 1         | Laser Power           | 51.0 %                   |
| Broadband Low Mass       | 100.3 m/z | End Plate               | 1500.0 V  | MALDI Plate           | 300.0 V                  |
| Broadband High Mass      | 600.0 m/z | Capillary Entrance      | 2000.0 V  | Imaging Spot Diameter | 2000.0 µm                |
| Acquisition Mode         | Single MS | Skimmer 1               | 20.0 V    |                       |                          |
| Pulse Program            | basic     | Drying Gas Temperature  | 180.0 °C  | Calibration Date      | Wed Jan 4 05:51:21 2012  |
| Source Accumulation      | 0.0 sec   | Drying Gas Flow Rate    | 4.0 L/min | Data Acquisition Size | 131072                   |
| Ion Accumulation Time    | 0.0 sec   | Nebulizer Gas Flow Rate | 1.0 L/min | Apodization           | Sine-Bell Multiplication |
| Flight Time to Acq. Cell | 0.0 sec   |                         |           |                       |                          |

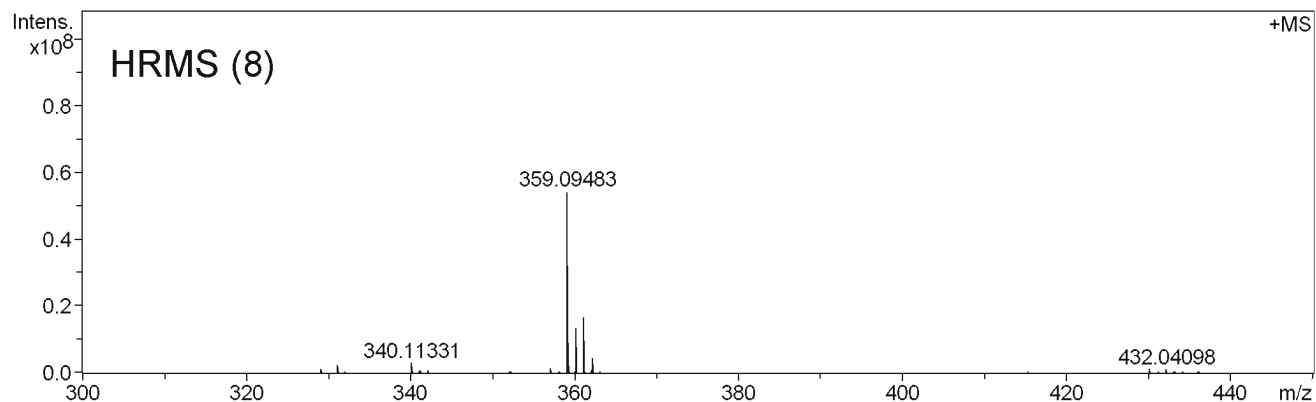

| Meas. m/z | # | Formula                                            | Score  | m/z       | err [mDa] | err [ppm] | mSigma | rdb  | e <sub>1</sub> | Conf | N-Rule |
|-----------|---|----------------------------------------------------|--------|-----------|-----------|-----------|--------|------|----------------|------|--------|
| 359.09483 | 1 | C <sub>22</sub> H <sub>16</sub> ClN <sub>2</sub> O | 100.00 | 359.09457 | -0.3      | -0.7      | 15.5   | 15.5 | even           |      | ok     |

## Mass Spectrum SmartFormula Report

### Analysis Info

Analysis Name D:\20120619\YIN\_11\_APCI\_POS\_000002.d  
Method Metal\_Trypsin digestion  
Sample Name YIN\_11\_APCI\_POS  
Comment

Acquisition Date 2012-6-19 19:11:31

Operator  
Instrument apex-Ultra

### Acquisition Parameter

|                          |           |                         |           |                       |                          |
|--------------------------|-----------|-------------------------|-----------|-----------------------|--------------------------|
| Polarity                 | Positive  | Source                  | APCI      | No. of Laser Shots    | 20                       |
| Averaged Scans           | 2         | No. of Cell Fills       | 1         | Laser Power           | 51.0 %                   |
| Broadband Low Mass       | 100.3 m/z | End Plate               | 1500.0 V  | MALDI Plate           | 300.0 V                  |
| Broadband High Mass      | 600.0 m/z | Capillary Entrance      | 2000.0 V  | Imaging Spot Diameter | 2000.0 µm                |
| Acquisition Mode         | Single MS | Skimmer 1               | 20.0 V    |                       |                          |
| Pulse Program            | basic     | Drying Gas Temperature  | 180.0 °C  | Calibration Date      | Wed Jan 4 05:51:21 2012  |
| Source Accumulation      | 0.0 sec   | Drying Gas Flow Rate    | 4.0 L/min | Data Acquisition Size | 131072                   |
| Ion Accumulation Time    | 0.0 sec   | Nebulizer Gas Flow Rate | 1.0 L/min | Apodization           | Sine-Bell Multiplication |
| Flight Time to Acq. Cell | 0.0 sec   |                         |           |                       |                          |

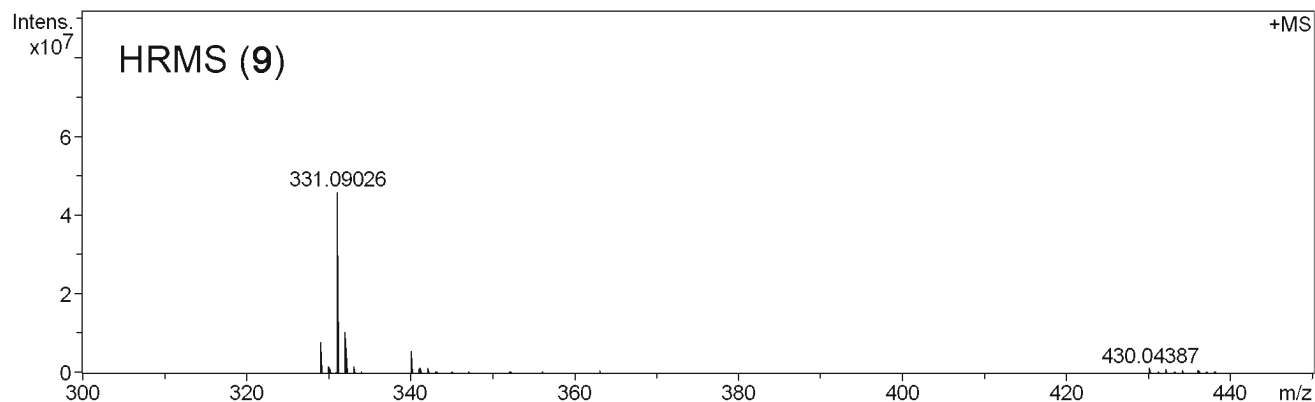

| Meas. m/z | # | Formula                                                       | Score  | m/z       | err [mDa] | err [ppm] | mSigma | rdb  | e <sub>j</sub> Conf | N-Rule |
|-----------|---|---------------------------------------------------------------|--------|-----------|-----------|-----------|--------|------|---------------------|--------|
| 331.09026 | 1 | C <sub>20</sub> H <sub>15</sub> N <sub>2</sub> O <sub>5</sub> | 100.00 | 331.08996 | -0.3      | -0.9      | 17.3   | 14.5 | even                | ok     |

# HSQC spectrum of compound 7 (600MHz, CDCl<sub>3</sub>)

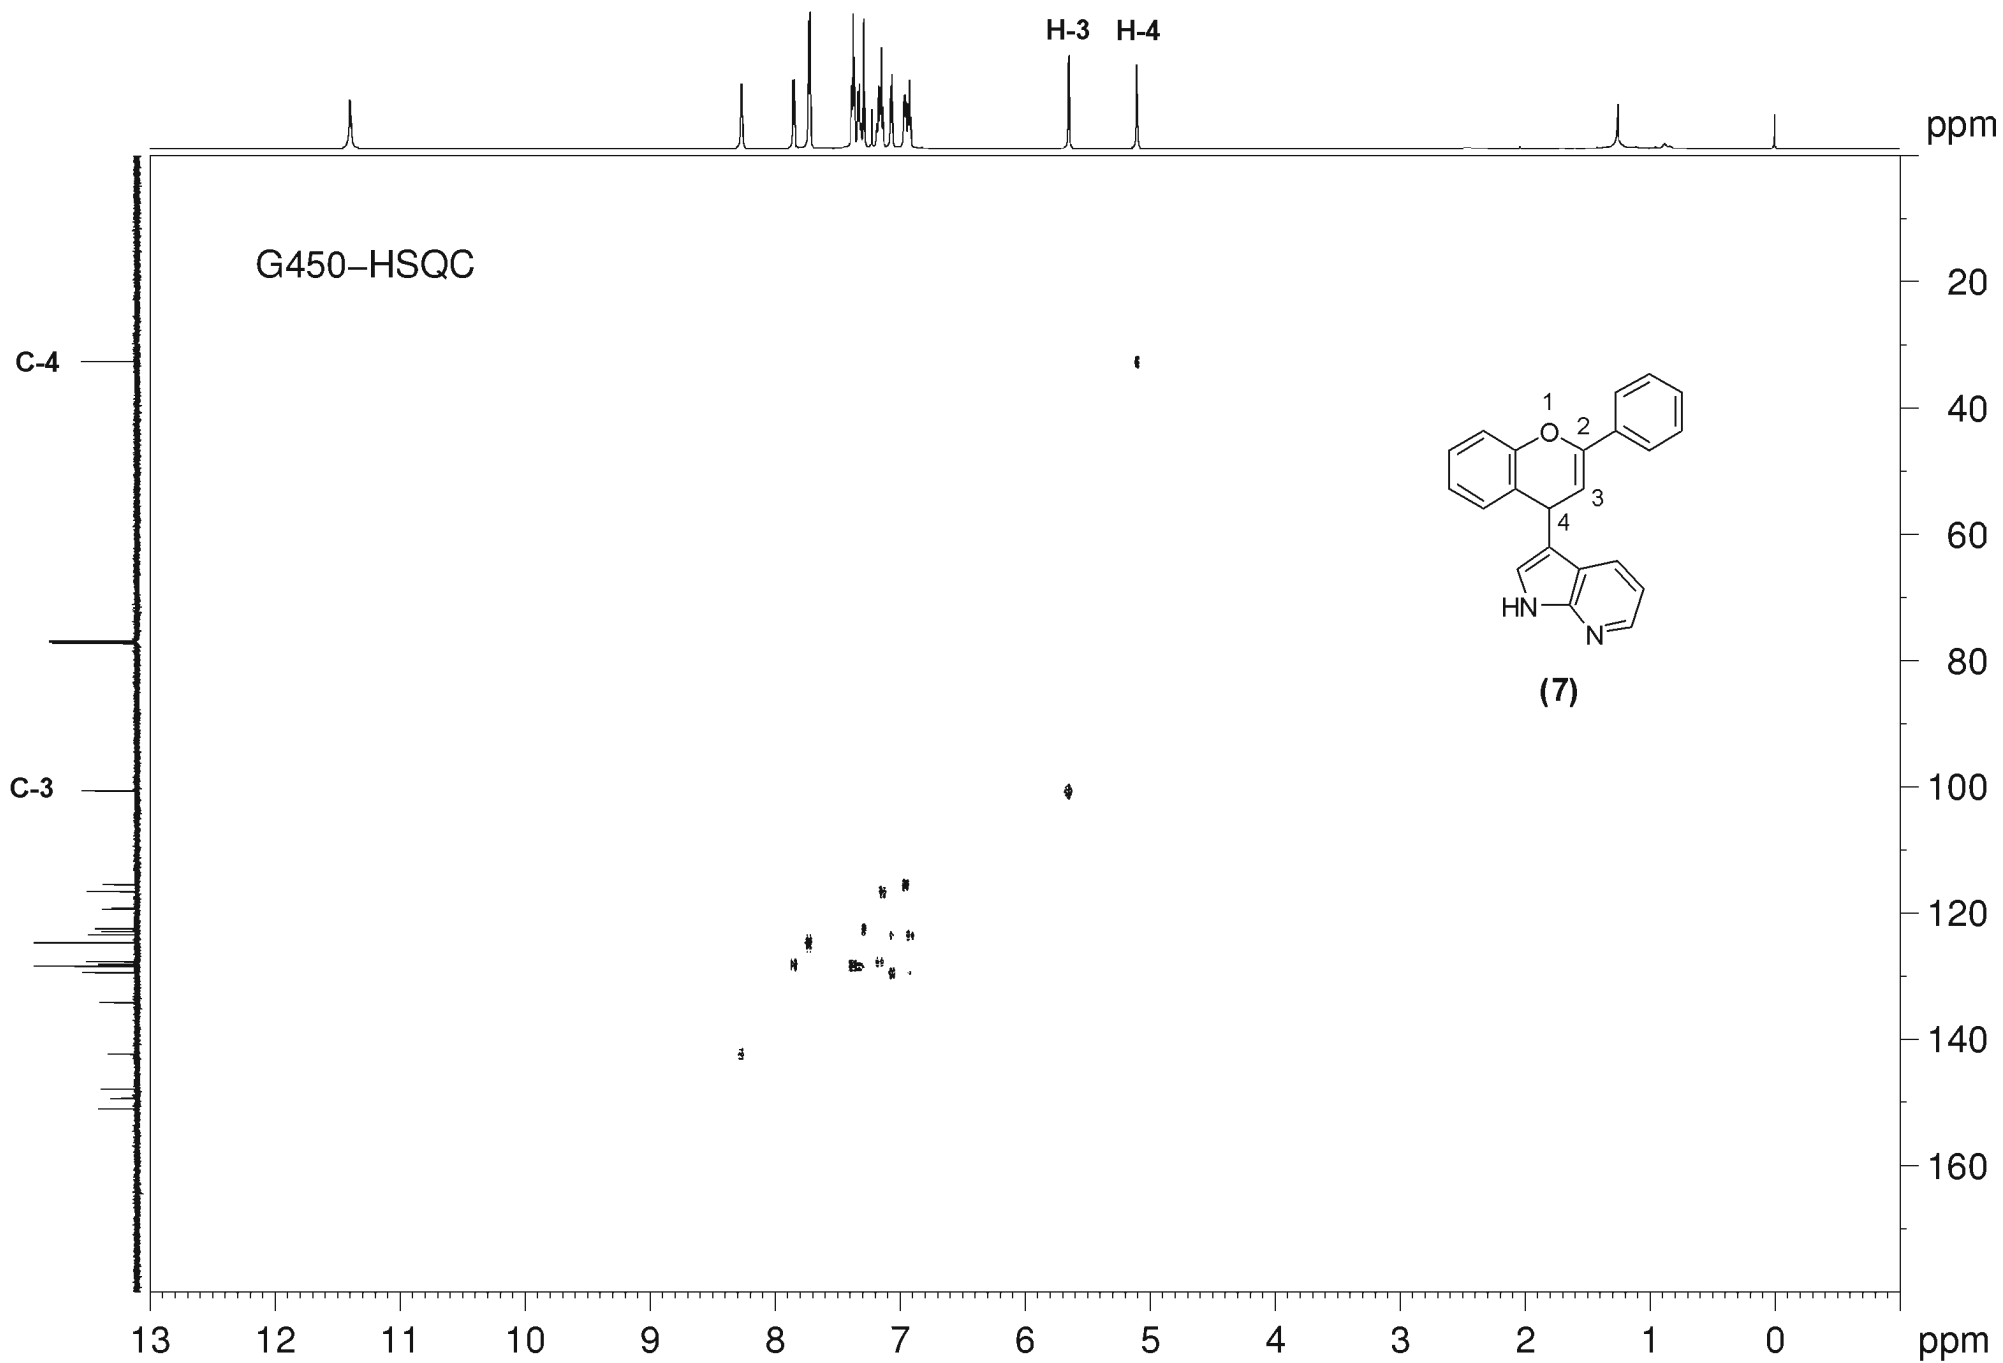

Supplement: c2ob26642c.pdf [file c2ob26642c.pdf]
